# Supplementary material
Source: publisher site journal article supplement (https://www.dovepress.com/article/255269)

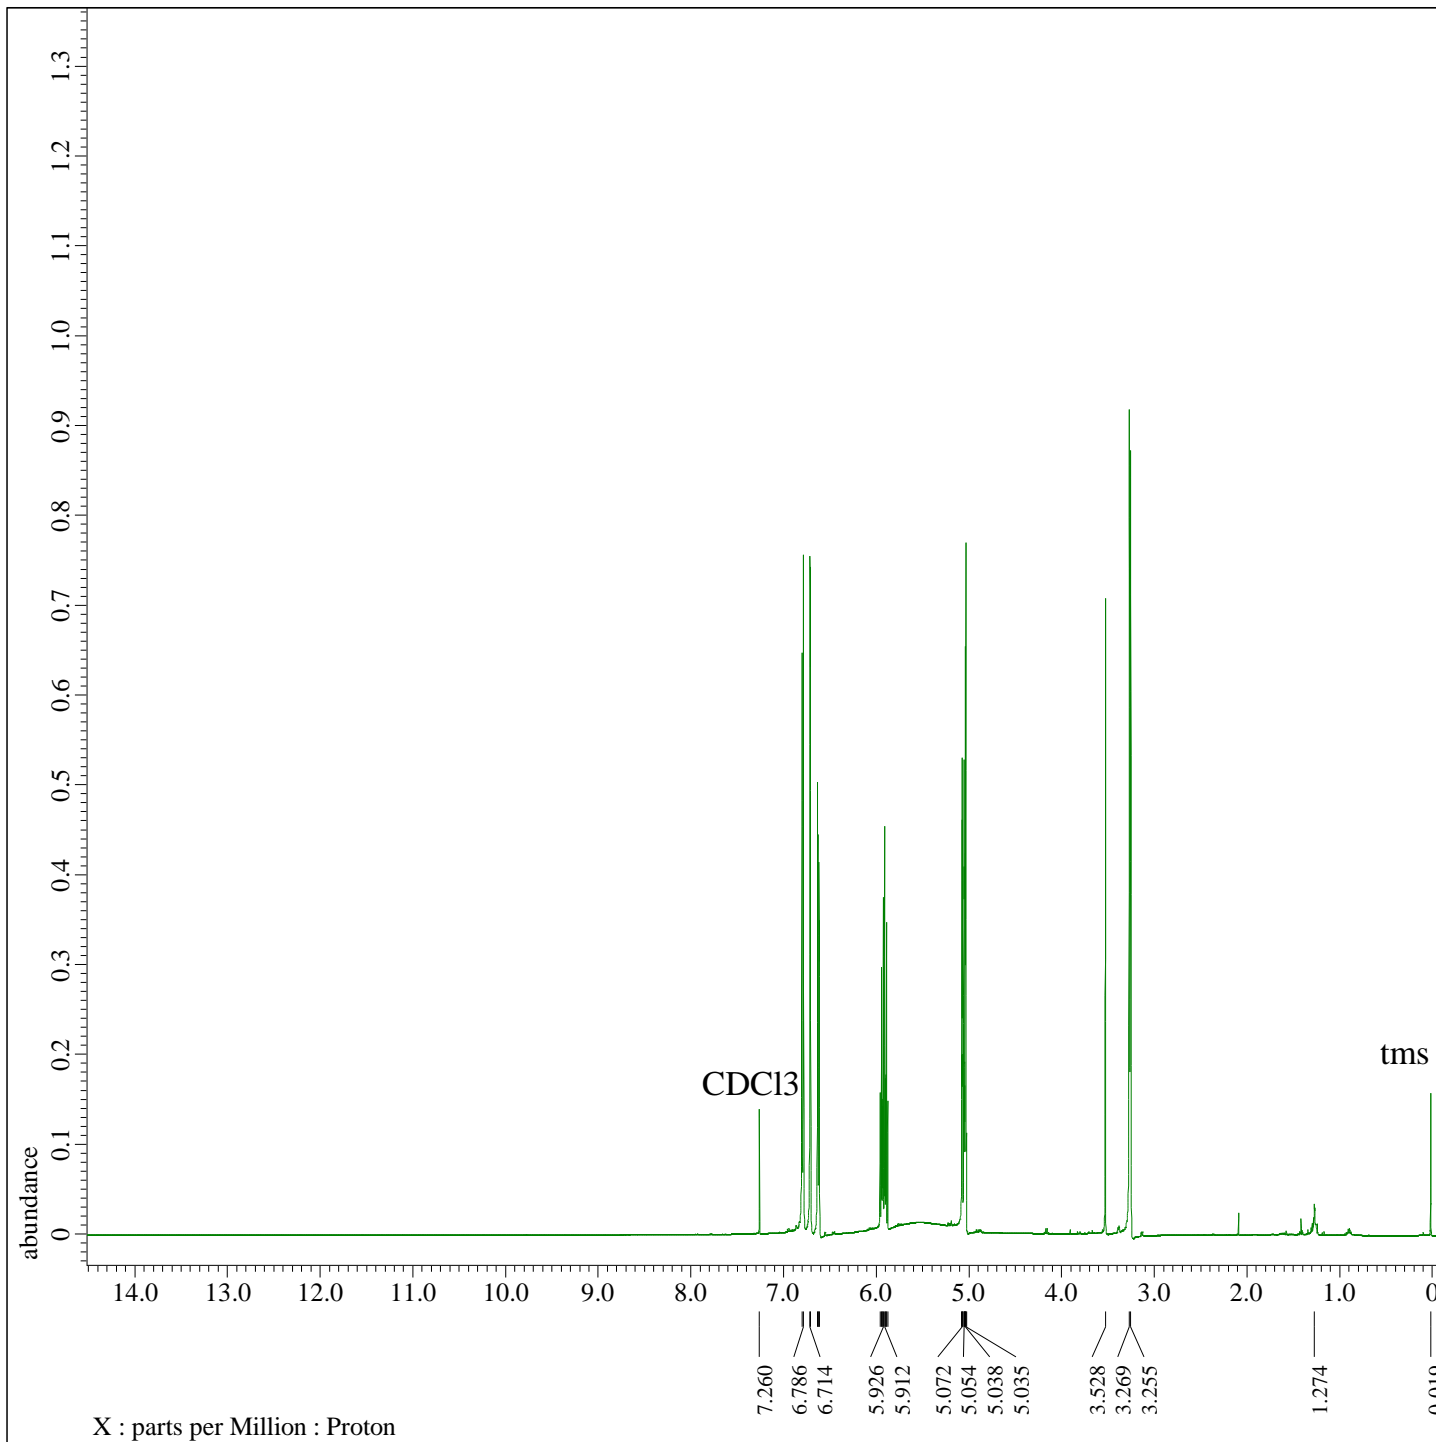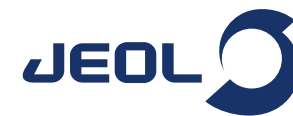

---- PROCESSING PARAMETERS ----  
sexf( 0.2[Hz], 0.0[s] )  
trapezoid( 0[%], 0[%], 80[%], 100[%] )  
zerofill( 1 )  
fft( 1, TRUE, TRUE )  
machinephase  
ppm

Filename = Geo-Proton-1-2.jdf  
Author = delta  
Experiment = proton.jxp  
Sample\_Id = Geo  
Solvent = CHLOROFORM-D  
Actual\_Start\_Time = 5-AUG-2019 10:07:3  
Revision\_Time = 21-AUG-2019 04:41:4

Comment = single\_pulse  
Data\_Format = 1D COMPLEX  
Dim\_Size = 13107  
X\_Domain = Proton  
Dim\_Title = Proton  
Dim\_Units = [ppm]  
Dimensions = X  
Spectrometer = JNM-ECZ500R/S1

Field\_Strength = 11.7473579[T] (500[  
X\_Acq\_Duration = 1.74587904[s]  
X\_Domain = Proton  
X\_Freq = 500.15991521[MHz]  
X\_Offset = 7.0[ppm]  
X\_Points = 16384  
X\_Prescans = 1  
X\_Resolution = 0.57277737[Hz]  
X\_Sweep = 9.38438438[kHz]  
X\_Sweep\_Clipped = 7.50750751[kHz]  
Irr\_Domain = Proton  
Irr\_Freq = 500.15991521[MHz]  
Irr\_Offset = 5.0[ppm]  
Tri\_Domain = Proton  
Tri\_Freq = 500.15991521[MHz]  
Tri\_Offset = 5.0[ppm]  
Blanking = 2[us]  
Clipped = FALSE  
Scans = 40  
Total\_Scans = 40

Relaxation\_Delay = 5[s]  
Recvr\_Gain = 36  
Temp\_Get = 19.6[dC]  
X\_90\_Width = 8[us]  
X\_Acq\_Time = 1.74587904[s]  
X\_Angle = 45[deg]  
X\_Atn = 8.9[dB]  
X\_Pulse = 4[us]  
Irr\_Mode = Off  
Tri\_Mode = Off  
Dante\_Loop = 500

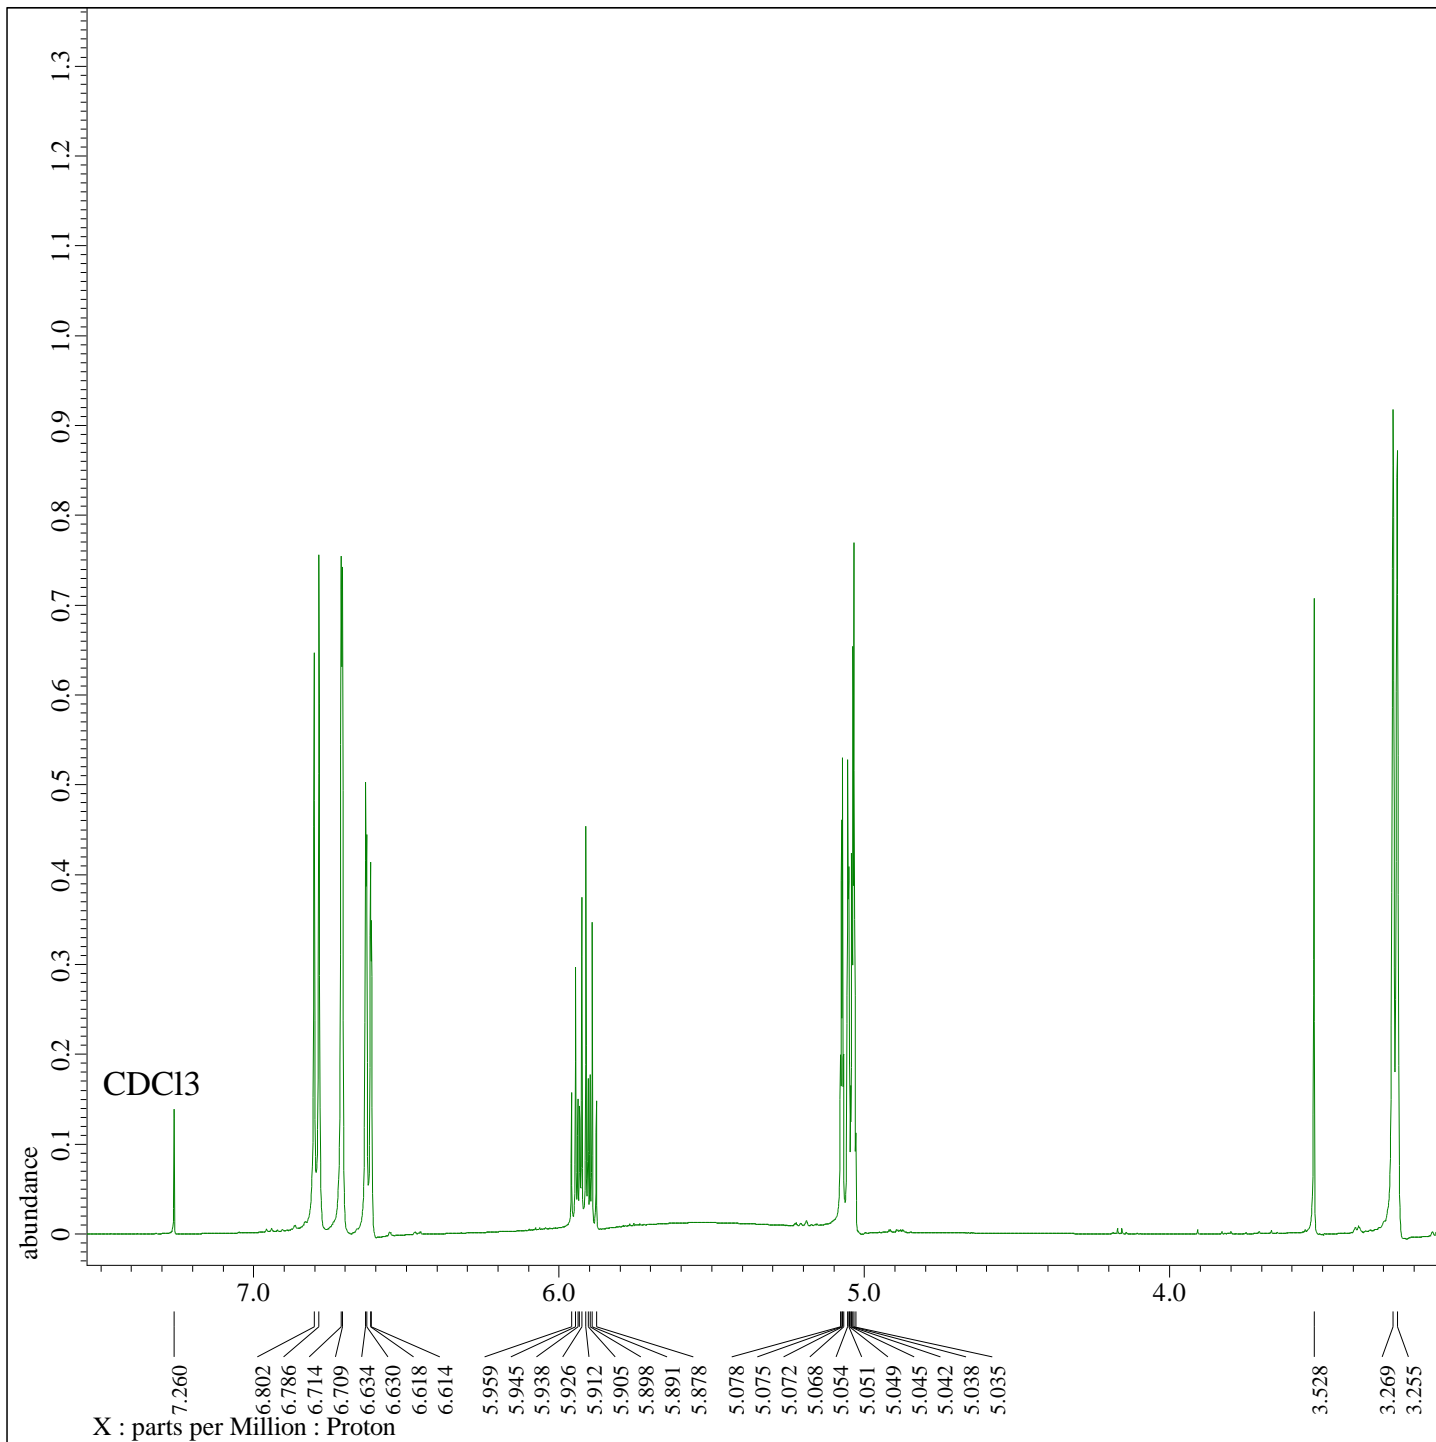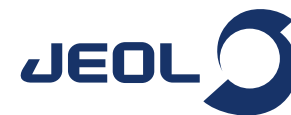

---- PROCESSING PARAMETERS ----  
sexp( 0.2[Hz], 0.0[s] )  
trapezoid( 0[%], 0[%], 80[%], 100[%] )  
zerofill( 1 )  
fft( 1, TRUE, TRUE )  
machinephase  
ppm

Filename = Geo-Proton-1-2.jdf  
Author = delta  
Experiment = proton.jxp  
Sample\_Id = Geo  
Solvent = CHLOROFORM-D  
Actual\_Start\_Time = 5-AUG-2019 10:07:3  
Revision\_Time = 21-AUG-2019 04:41:4

Comment = single\_pulse  
Data\_Format = 1D COMPLEX  
Dim\_Size = 13107  
X\_Domain = Proton  
Dim\_Title = Proton  
Dim\_Units = [ppm]  
Dimensions = X  
Spectrometer = JNM-ECZ500R/S1

Field\_Strength = 11.7473579[T] (500[  
X\_Acq\_Duration = 1.74587904[s]  
X\_Domain = Proton  
X\_Freq = 500.15991521[MHz]  
X\_Offset = 7.0[ppm]  
X\_Points = 16384  
X\_Prescans = 1  
X\_Resolution = 0.57277737[Hz]  
X\_Sweep = 9.38438438[kHz]  
X\_Sweep\_Clipped = 7.50750751[kHz]  
Irr\_Domain = Proton  
Irr\_Freq = 500.15991521[MHz]  
Irr\_Offset = 5.0[ppm]  
Tri\_Domain = Proton  
Tri\_Freq = 500.15991521[MHz]  
Tri\_Offset = 5.0[ppm]  
Blanking = 2[us]  
Clipped = FALSE  
Scans = 40  
Total\_Scans = 40

Relaxation\_Delay = 5[s]  
Recvr\_Gain = 36  
Temp\_Get = 19.6[dC]  
X\_90\_Width = 8[us]  
X\_Acq\_Time = 1.74587904[s]  
X\_Angle = 45[deg]  
X\_Atn = 8.9[dB]  
X\_Pulse = 4[us]  
Irr\_Mode = Off  
Tri\_Mode = Off  
Dante\_Loop = 500

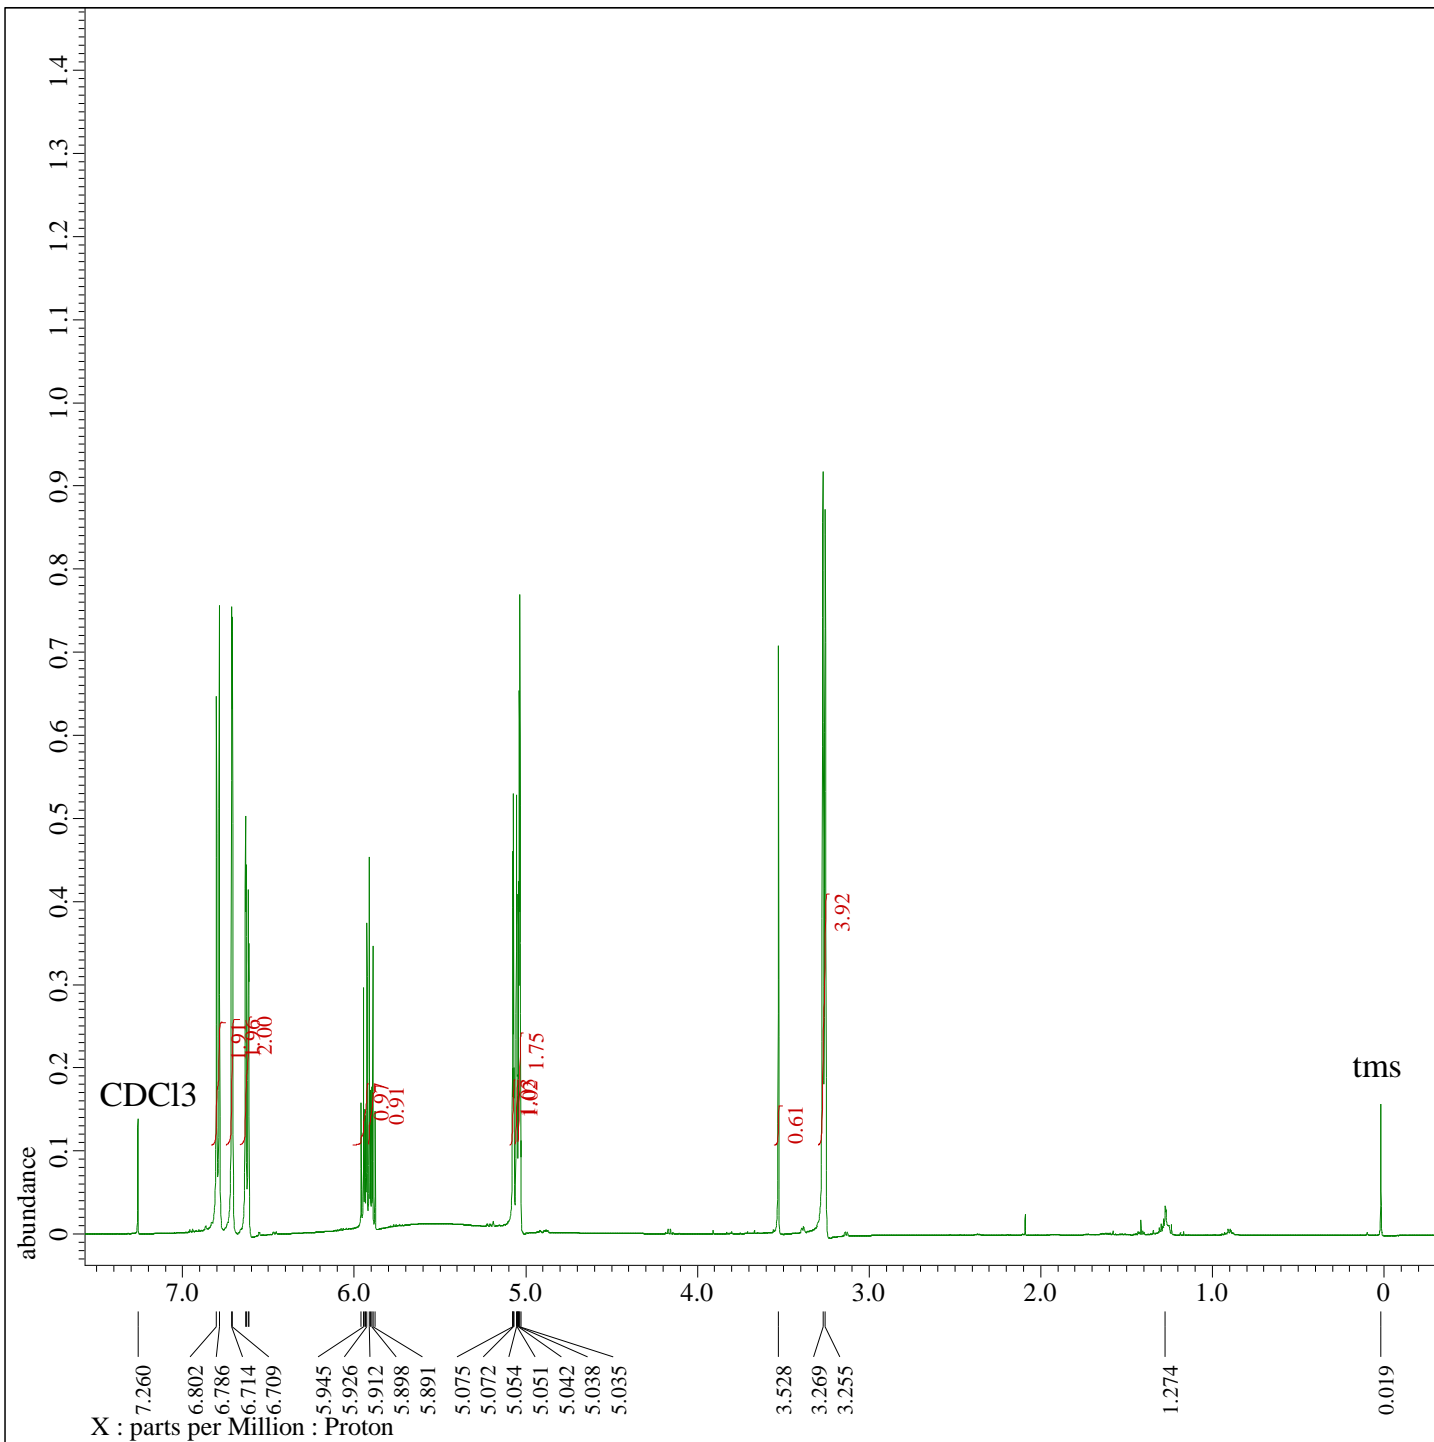

---- PROCESSING PARAMETERS ----  
sexp( 0.2[Hz], 0.0[s] )  
trapezoid( 0[%], 0[%], 80[%], 100[%] )  
zerofill( 1 )  
fft( 1, TRUE, TRUE )  
machinephase  
ppm

Filename = Geo-Proton-1-2.jdf  
Author = delta  
Experiment = proton.jxp  
Sample\_Id = Geo  
Solvent = CHLOROFORM-D  
Actual\_Start\_Time = 5-AUG-2019 10:07:3  
Revision\_Time = 21-AUG-2019 04:46:2

Comment = single\_pulse  
Data\_Format = 1D COMPLEX  
Dim\_Size = 13107  
X\_Domain = Proton  
Dim\_Title = Proton  
Dim\_Units = [ppm]  
Dimensions = X  
Spectrometer = JNM-ECZ500R/S1

Field\_Strength = 11.7473579[T] (500[  
X\_Acq\_Duration = 1.74587904[s]  
X\_Domain = Proton  
X\_Freq = 500.15991521[MHz]  
X\_Offset = 7.0[ppm]  
X\_Points = 16384  
X\_Prescans = 1  
X\_Resolution = 0.57277737[Hz]  
X\_Sweep = 9.38438438[kHz]  
X\_Sweep\_Clipped = 7.50750751[kHz]  
Irr\_Domain = Proton  
Irr\_Freq = 500.15991521[MHz]  
Irr\_Offset = 5.0[ppm]  
Tri\_Domain = Proton  
Tri\_Freq = 500.15991521[MHz]  
Tri\_Offset = 5.0[ppm]  
Blanking = 2[us]  
Clipped = FALSE  
Scans = 40  
Total\_Scans = 40

Relaxation\_Delay = 5[s]  
Recvr\_Gain = 36  
Temp\_Get = 19.6[dC]  
X\_90\_Width = 8[us]  
X\_Acq\_Time = 1.74587904[s]  
X\_Angle = 45[deg]  
X\_Atn = 8.9[dB]  
X\_Pulse = 4[us]  
Irr\_Mode = Off  
Tri\_Mode = Off  
Dante\_Loop = 500

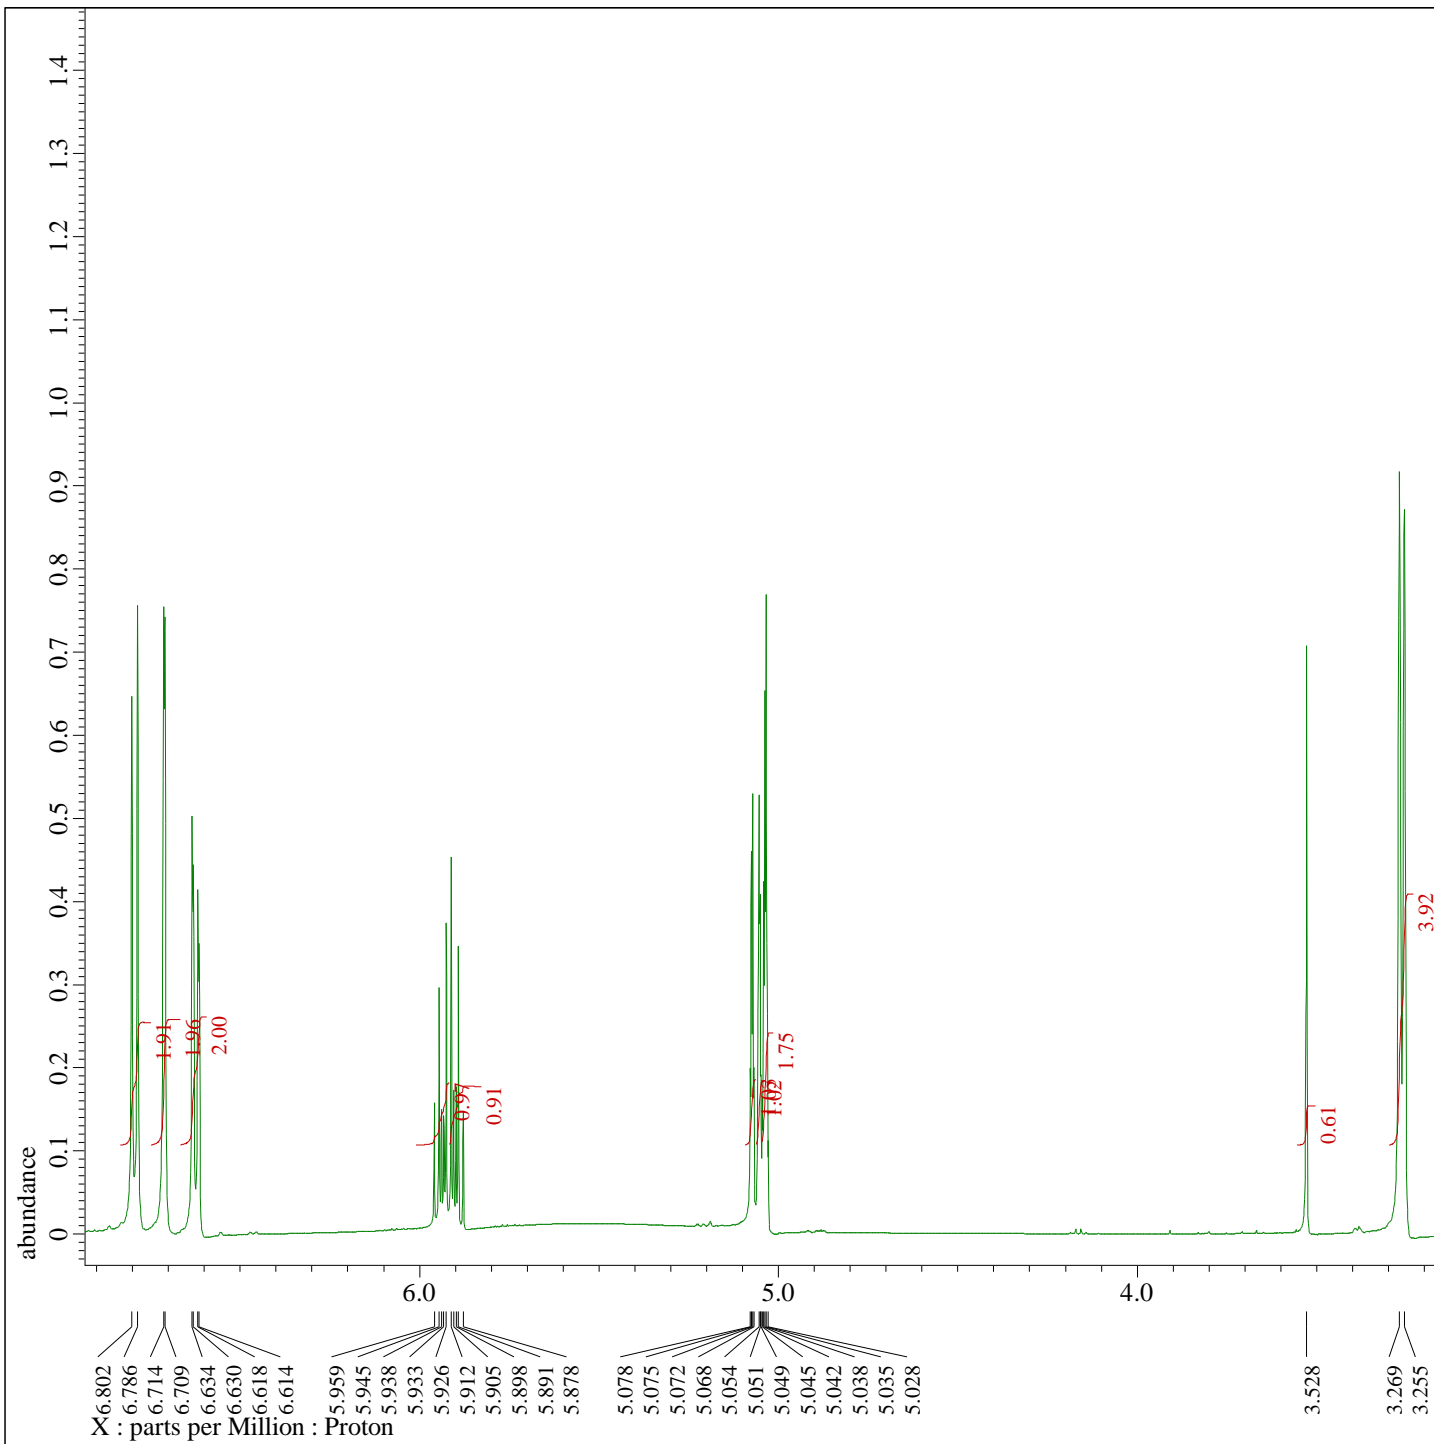

---- PROCESSING PARAMETERS ----  
sexp( 0.2[Hz], 0.0[s] )  
trapezoid( 0[%], 0[%], 80[%], 100[%] )  
zerofill( 1 )  
fft( 1, TRUE, TRUE )  
machinephase  
ppm

Filename = Geo-Proton-1-2.jdf  
Author = delta  
Experiment = proton.jxp  
Sample\_Id = Geo  
Solvent = CHLOROFORM-D  
Actual\_Start\_Time = 5-AUG-2019 10:07:3  
Revision\_Time = 21-AUG-2019 04:46:2

Comment = single\_pulse  
Data\_Format = 1D COMPLEX  
Dim\_Size = 13107  
X\_Domain = Proton  
Dim\_Title = Proton  
Dim\_Units = [ppm]  
Dimensions = X  
Spectrometer = JNM-ECZ500R/S1

Field\_Strength = 11.7473579[T] (500[  
X\_Acq\_Duration = 1.74587904[s]  
X\_Domain = Proton  
X\_Freq = 500.15991521[MHz]  
X\_Offset = 7.0[ppm]  
X\_Points = 16384  
X\_Prescans = 1  
X\_Resolution = 0.57277737[Hz]  
X\_Sweep = 9.38438438[kHz]  
X\_Sweep\_Clipped = 7.50750751[kHz]  
Irr\_Domain = Proton  
Irr\_Freq = 500.15991521[MHz]  
Irr\_Offset = 5.0[ppm]  
Tri\_Domain = Proton  
Tri\_Freq = 500.15991521[MHz]  
Tri\_Offset = 5.0[ppm]  
Blanking = 2[us]  
Clipped = FALSE  
Scans = 40  
Total\_Scans = 40

Relaxation\_Delay = 5[s]  
Recvr\_Gain = 36  
Temp\_Get = 19.6[dC]  
X\_90\_Width = 8[us]  
X\_Acq\_Time = 1.74587904[s]  
X\_Angle = 45[deg]  
X\_Atn = 8.9[dB]  
X\_Pulse = 4[us]  
Irr\_Mode = Off  
Tri\_Mode = Off  
Dante\_Loop = 500

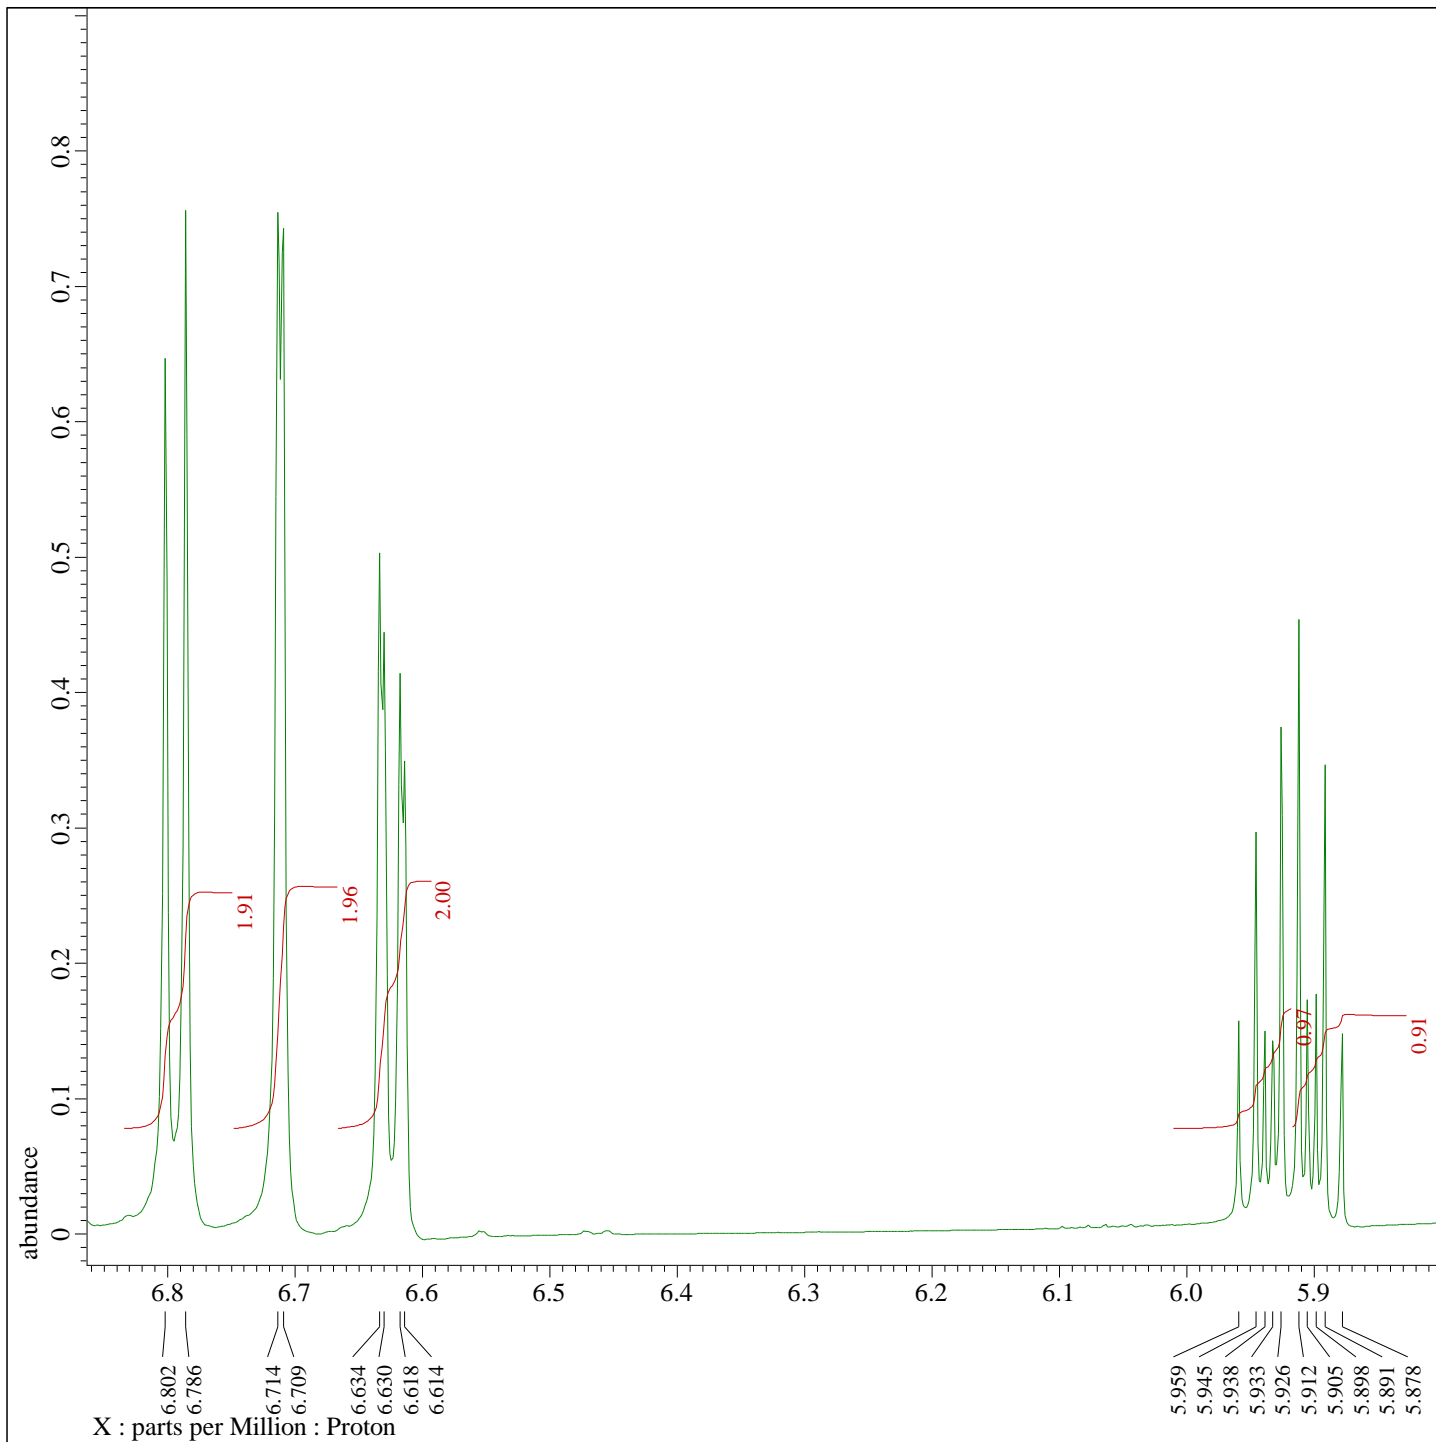

---- PROCESSING PARAMETERS ----  
sexp( 0.2[Hz], 0.0[s] )  
trapezoid( 0[%], 0[%], 80[%], 100[%] )  
zerofill( 1 )  
fft( 1, TRUE, TRUE )  
machinephase  
ppm

Filename = Geo-Proton-1-2.jdf  
Author = delta  
Experiment = proton.jxp  
Sample\_Id = Geo  
Solvent = CHLOROFORM-D  
Actual\_Start\_Time = 5-AUG-2019 10:07:3  
Revision\_Time = 21-AUG-2019 04:46:2

Comment = single\_pulse  
Data\_Format = 1D COMPLEX  
Dim\_Size = 13107  
X\_Domain = Proton  
Dim\_Title = Proton  
Dim\_Units = [ppm]  
Dimensions = X  
Spectrometer = JNM-ECZ500R/S1

Field\_Strength = 11.7473579[T] (500[  
X\_Acq\_Duration = 1.74587904[s]  
X\_Domain = Proton  
X\_Freq = 500.15991521[MHz]  
X\_Offset = 7.0[ppm]  
X\_Points = 16384  
X\_Prescans = 1  
X\_Resolution = 0.57277737[Hz]  
X\_Sweep = 9.38438438[kHz]  
X\_Sweep\_Clipped = 7.50750751[kHz]  
Irr\_Domain = Proton  
Irr\_Freq = 500.15991521[MHz]  
Irr\_Offset = 5.0[ppm]  
Tri\_Domain = Proton  
Tri\_Freq = 500.15991521[MHz]  
Tri\_Offset = 5.0[ppm]  
Blanking = 2[us]  
Clipped = FALSE  
Scans = 40  
Total\_Scans = 40

Relaxation\_Delay = 5[s]  
Recvr\_Gain = 36  
Temp\_Get = 19.6[dC]  
X\_90\_Width = 8[us]  
X\_Acq\_Time = 1.74587904[s]  
X\_Angle = 45[deg]  
X\_Atn = 8.9[dB]  
X\_Pulse = 4[us]  
Irr\_Mode = Off  
Tri\_Mode = Off  
Dante\_Loop = 500

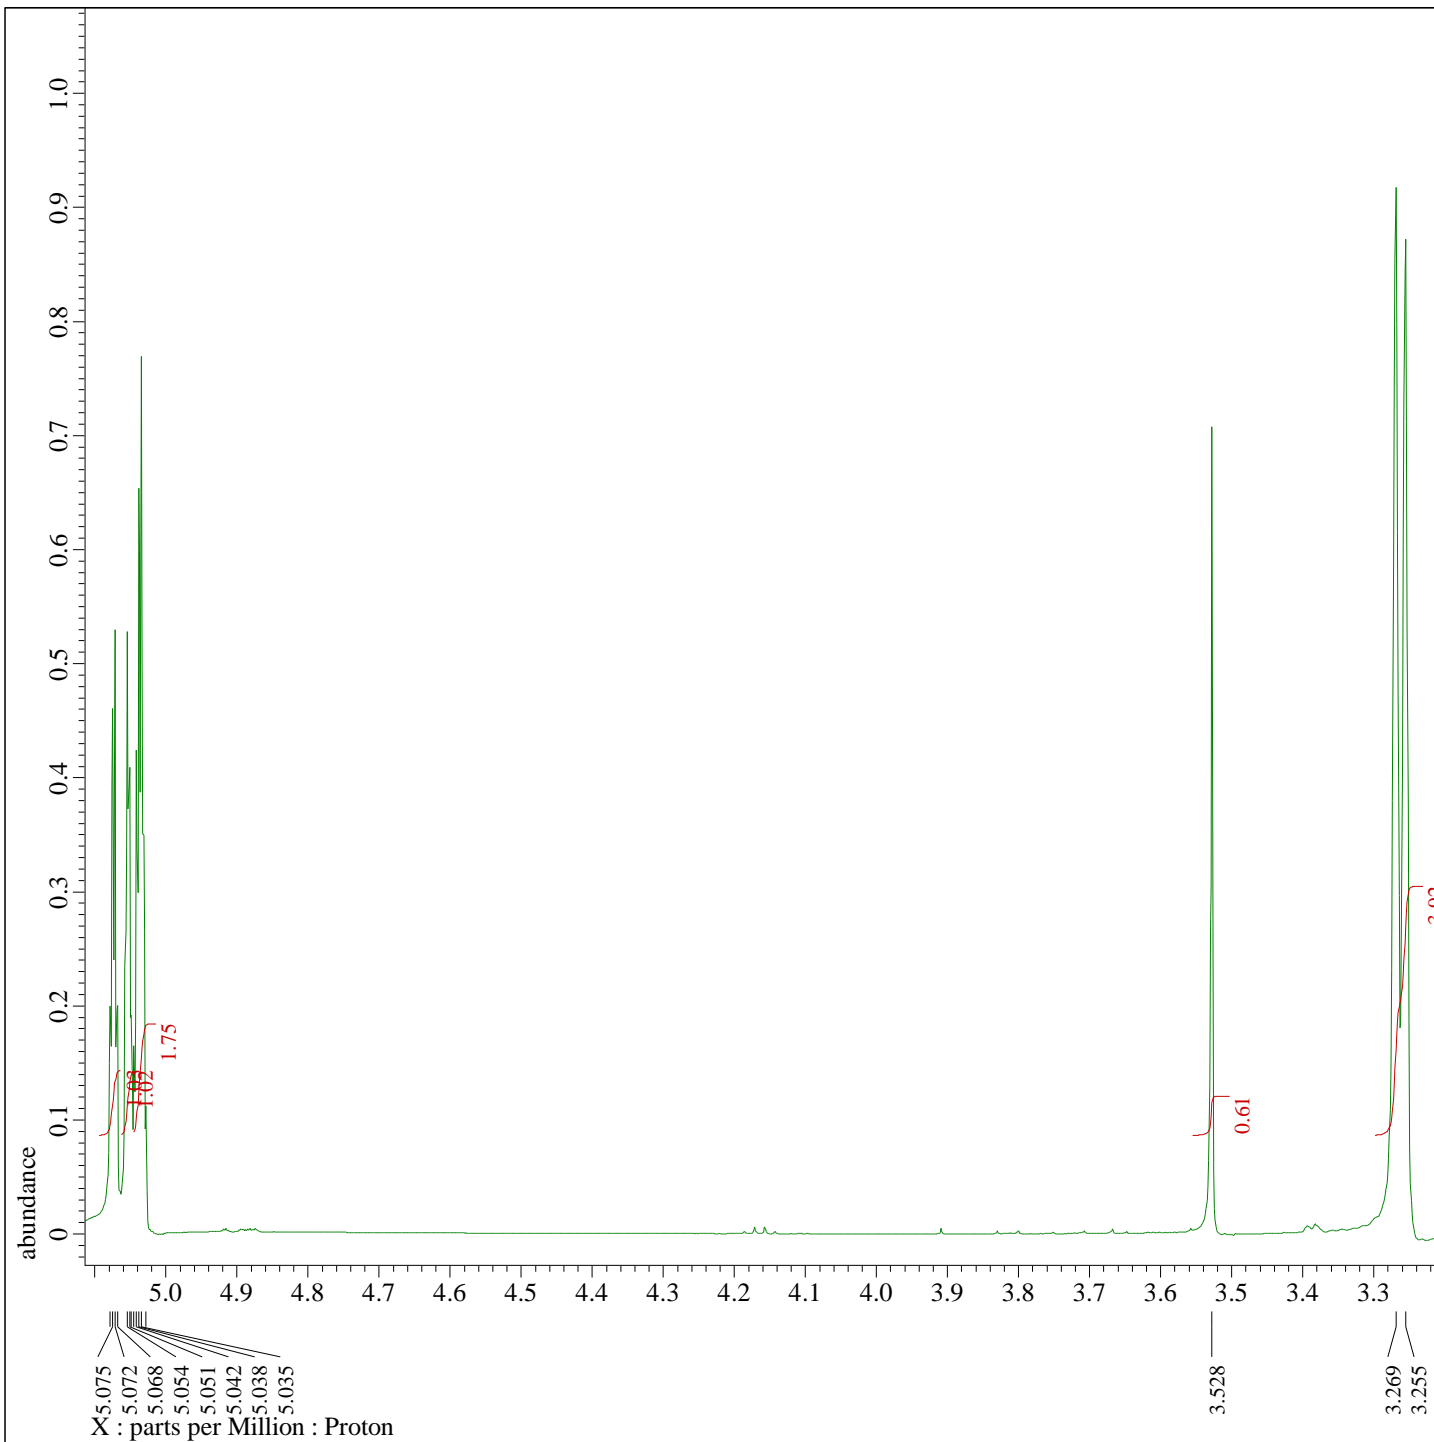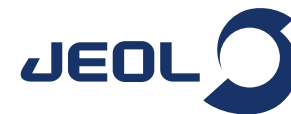

---- PROCESSING PARAMETERS ----  
sexf( 0.2[Hz], 0.0[s] )  
trapezoid( 0[%], 0[%], 80[%], 100[%] )  
zerofill( 1 )  
fft( 1, TRUE, TRUE )  
machinephase  
ppm

Filename = Geo-Proton-1-2.jdf  
Author = delta  
Experiment = proton.jxp  
Sample\_Id = Geo  
Solvent = CHLOROFORM-D  
Actual\_Start\_Time = 5-AUG-2019 10:07:3  
Revision\_Time = 21-AUG-2019 04:46:2

Comment = single\_pulse  
Data\_Format = 1D COMPLEX  
Dim\_Size = 13107  
X\_Domain = Proton  
Dim\_Title = Proton  
Dim\_Units = [ppm]  
Dimensions = X  
Spectrometer = JNM-ECZ500R/S1

Field\_Strength = 11.7473579[T] (500[  
X\_Acq\_Duration = 1.74587904[s]  
X\_Domain = Proton  
X\_Freq = 500.15991521[MHz]  
X\_Offset = 7.0[ppm]  
X\_Points = 16384  
X\_Prescans = 1  
X\_Resolution = 0.57277737[Hz]  
X\_Sweep = 9.38438438[kHz]  
X\_Sweep\_Clipped = 7.50750751[kHz]  
Irr\_Domain = Proton  
Irr\_Freq = 500.15991521[MHz]  
Irr\_Offset = 5.0[ppm]  
Tri\_Domain = Proton  
Tri\_Freq = 500.15991521[MHz]  
Tri\_Offset = 5.0[ppm]  
Blanking = 2[us]  
Clipped = FALSE  
Scans = 40  
Total\_Scans = 40

Relaxation\_Delay = 5[s]  
Recvr\_Gain = 36  
Temp\_Get = 19.6[dC]  
X\_90\_Width = 8[us]  
X\_Acq\_Time = 1.74587904[s]  
X\_Angle = 45[deg]  
X\_Atn = 8.9[dB]  
X\_Pulse = 4[us]  
Irr\_Mode = Off  
Tri\_Mode = Off  
Dante\_Loop = 500

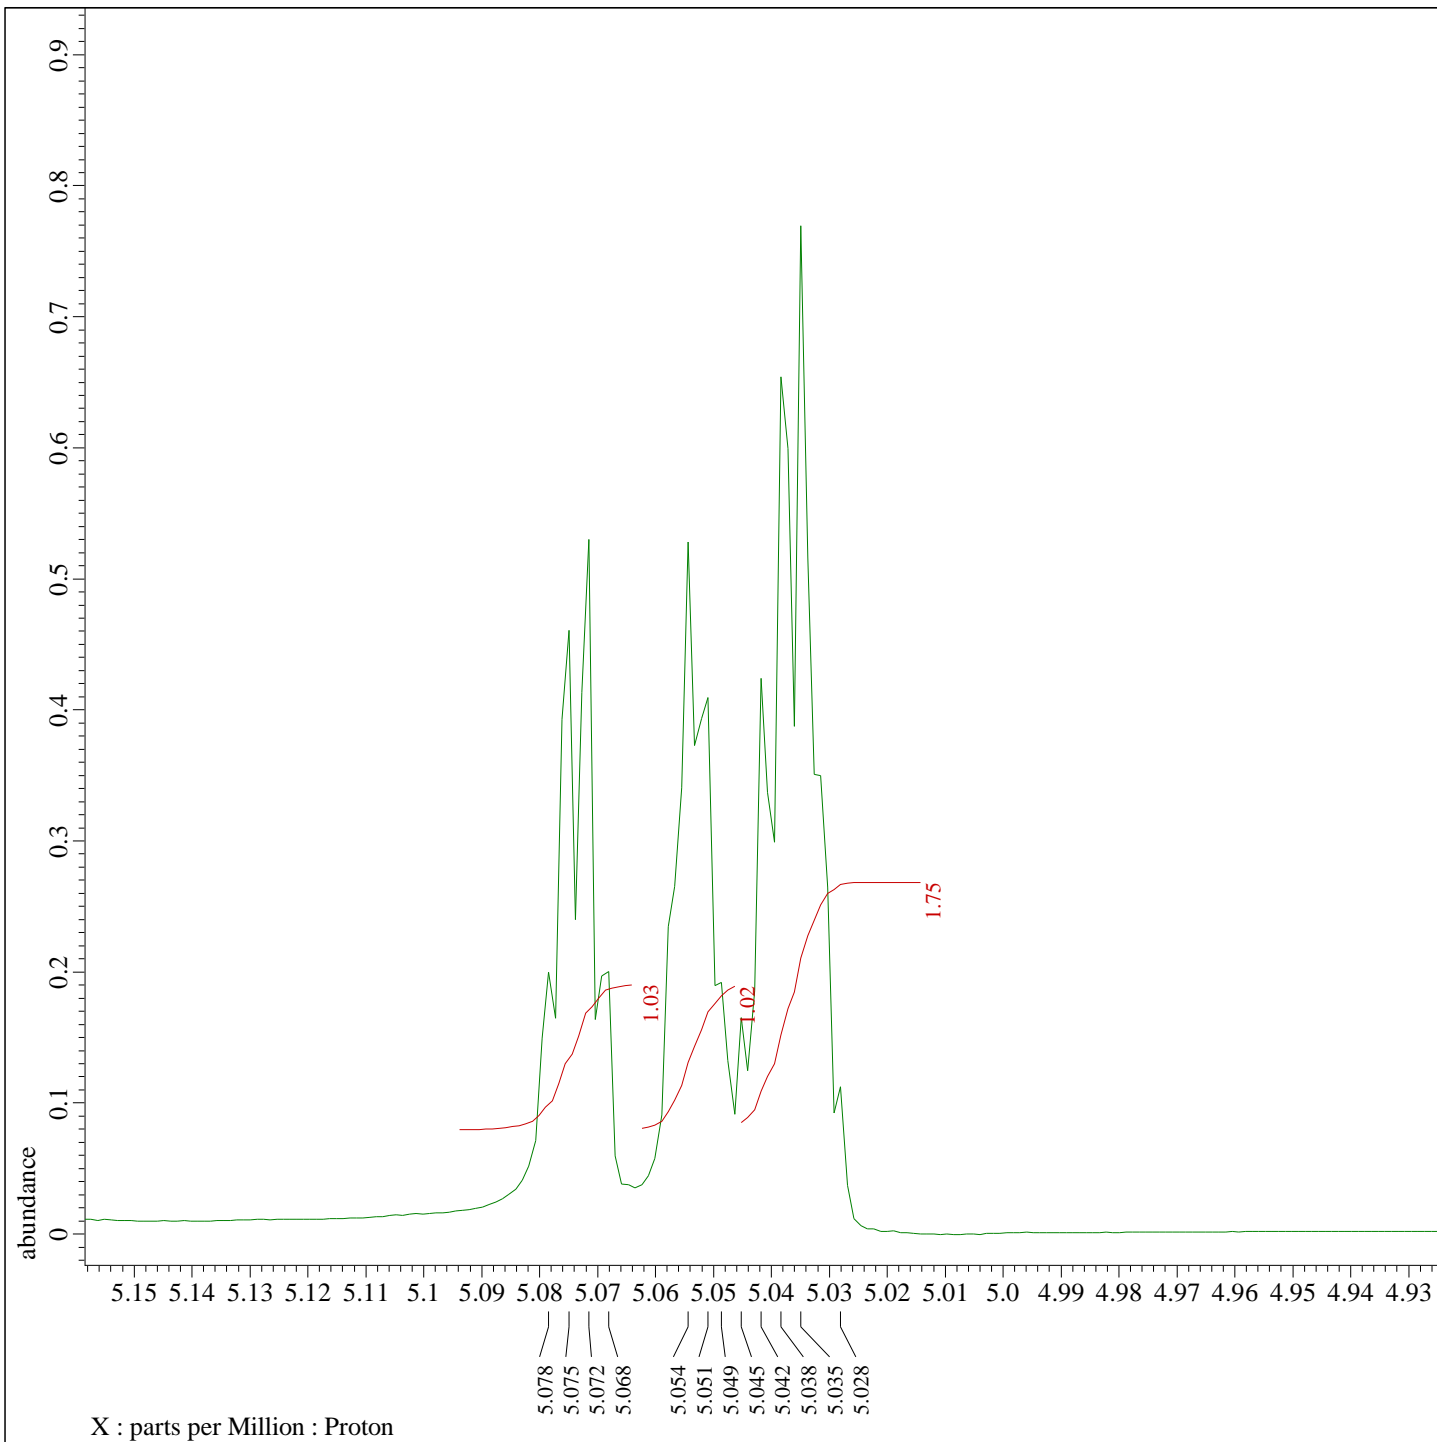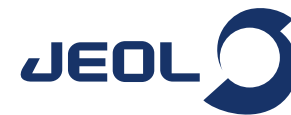

---- PROCESSING PARAMETERS ----  
sexp( 0.2[Hz], 0.0[s] )  
trapezoid( 0[%], 0[%], 80[%], 100[%] )  
zerofill( 1 )  
fft( 1, TRUE, TRUE )  
machinephase  
ppm

Filename = Geo-Proton-1-2.jdf  
Author = delta  
Experiment = proton.jxp  
Sample\_Id = Geo  
Solvent = CHLOROFORM-D  
Actual\_Start\_Time = 5-AUG-2019 10:07:3  
Revision\_Time = 21-AUG-2019 04:46:2

Comment = single\_pulse  
Data\_Format = 1D COMPLEX  
Dim\_Size = 13107  
X\_Domain = Proton  
Dim\_Title = Proton  
Dim\_Units = [ppm]  
Dimensions = X  
Spectrometer = JNM-ECZ500R/S1

Field\_Strength = 11.7473579[T] (500[  
X\_Acq\_Duration = 1.74587904[s]  
X\_Domain = Proton  
X\_Freq = 500.15991521[MHz]  
X\_Offset = 7.0[ppm]  
X\_Points = 16384  
X\_Prescans = 1  
X\_Resolution = 0.57277737[Hz]  
X\_Sweep = 9.38438438[kHz]  
X\_Sweep\_Clipped = 7.50750751[kHz]  
Irr\_Domain = Proton  
Irr\_Freq = 500.15991521[MHz]  
Irr\_Offset = 5.0[ppm]  
Tri\_Domain = Proton  
Tri\_Freq = 500.15991521[MHz]  
Tri\_Offset = 5.0[ppm]  
Blanking = 2[us]  
Clipped = FALSE  
Scans = 40  
Total\_Scans = 40

Relaxation\_Delay = 5[s]  
Recvr\_Gain = 36  
Temp\_Get = 19.6[dC]  
X\_90\_Width = 8[us]  
X\_Acq\_Time = 1.74587904[s]  
X\_Angle = 45[deg]  
X\_Atn = 8.9[dB]  
X\_Pulse = 4[us]  
Irr\_Mode = Off  
Tri\_Mode = Off  
Dante\_Loop = 500

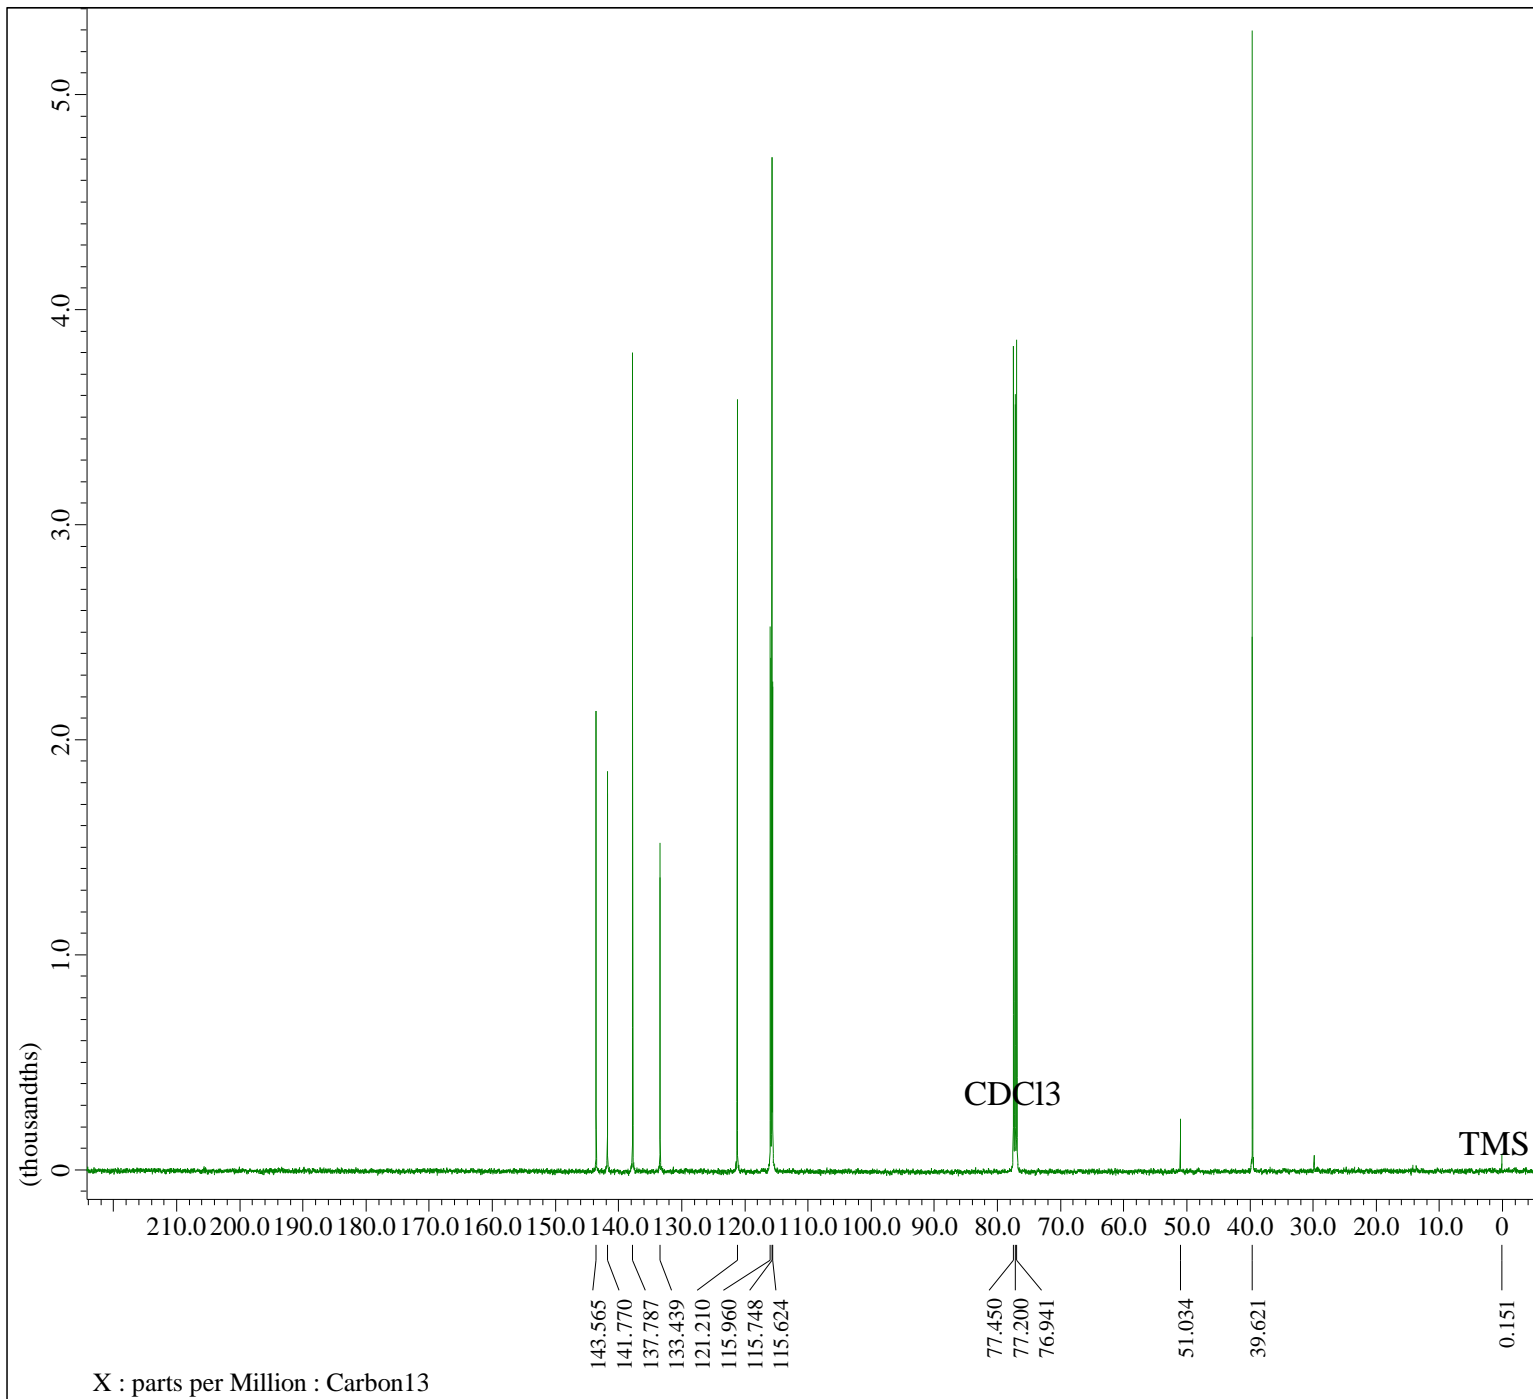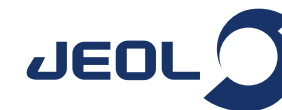

---- PROCESSING PARAMETERS ----  
sexp( 2.0[Hz], 0.0[s] )  
trapezoid( 0[%], 0[%], 80[%], 100[%] )  
zerofill( 1 )  
fft( 1, TRUE, TRUE )  
machinephase  
ppm

Derived from: GEO\_Carbon-1-1.jdf

Filename = GEO\_Carbon-1-2.jdf  
Author = delta  
Experiment = carbon.jxp  
Sample\_Id = GEO  
Solvent = CHLOROFORM-D  
Actual\_Start\_Time = 6-AUG-2019 08:58:  
Revision\_Time = 6-AUG-2019 13:33:

Comment = single pulse decou  
Data\_Format = 1D COMPLEX  
Dim\_Size = 26214  
X\_Domain = Carbon13  
Dim\_Title = Carbon13  
Dim\_Units = [ppm]  
Dimensions = X  
Spectrometer = JNM-ECZ500R/S1

Field\_Strength = 11.7473579[T] (500  
X\_Acq\_Duration = 0.82837504[s]  
X\_Domain = Carbon13  
X\_Freq = 125.76529768[MHz]  
X\_Offset = 100[ppm]  
X\_Points = 32768  
X\_Prescans = 4  
X\_Resolution = 1.20718268[Hz]  
X\_Sweep = 39.55696203[kHz]  
X\_Sweep\_Clipped = 31.64556962[kHz]  
Irr\_Domain = Proton  
Irr\_Freq = 500.15991521[MHz]  
Irr\_Offset = 5.0[ppm]  
Blanking = 2[us]  
Clipped = FALSE  
Scans = 2037  
Total\_Scans = 2037

Relaxation\_Delay = 2[s]  
Recvr\_Gain = 36  
Temp\_Get = 19.2[dC]  
X\_90\_Width = 11.3[us]  
X\_Acq\_Time = 0.82837504[s]  
X\_Angle = 30[deg]  
X\_Atn = 11[dB]  
X\_Pulse = 3.76666667[us]  
Irr\_Atn\_Dec = 30.11[dB]  
Irr\_Atn\_Dec\_Calc = 30.11[dB]  
Irr\_Atn\_Dec\_Default\_Calc = 30.11[dB]  
Irr\_Atn\_No = 30.11[dB]  
Irr\_Dec\_Bandwidth\_Hz = 5.97826087[kHz]



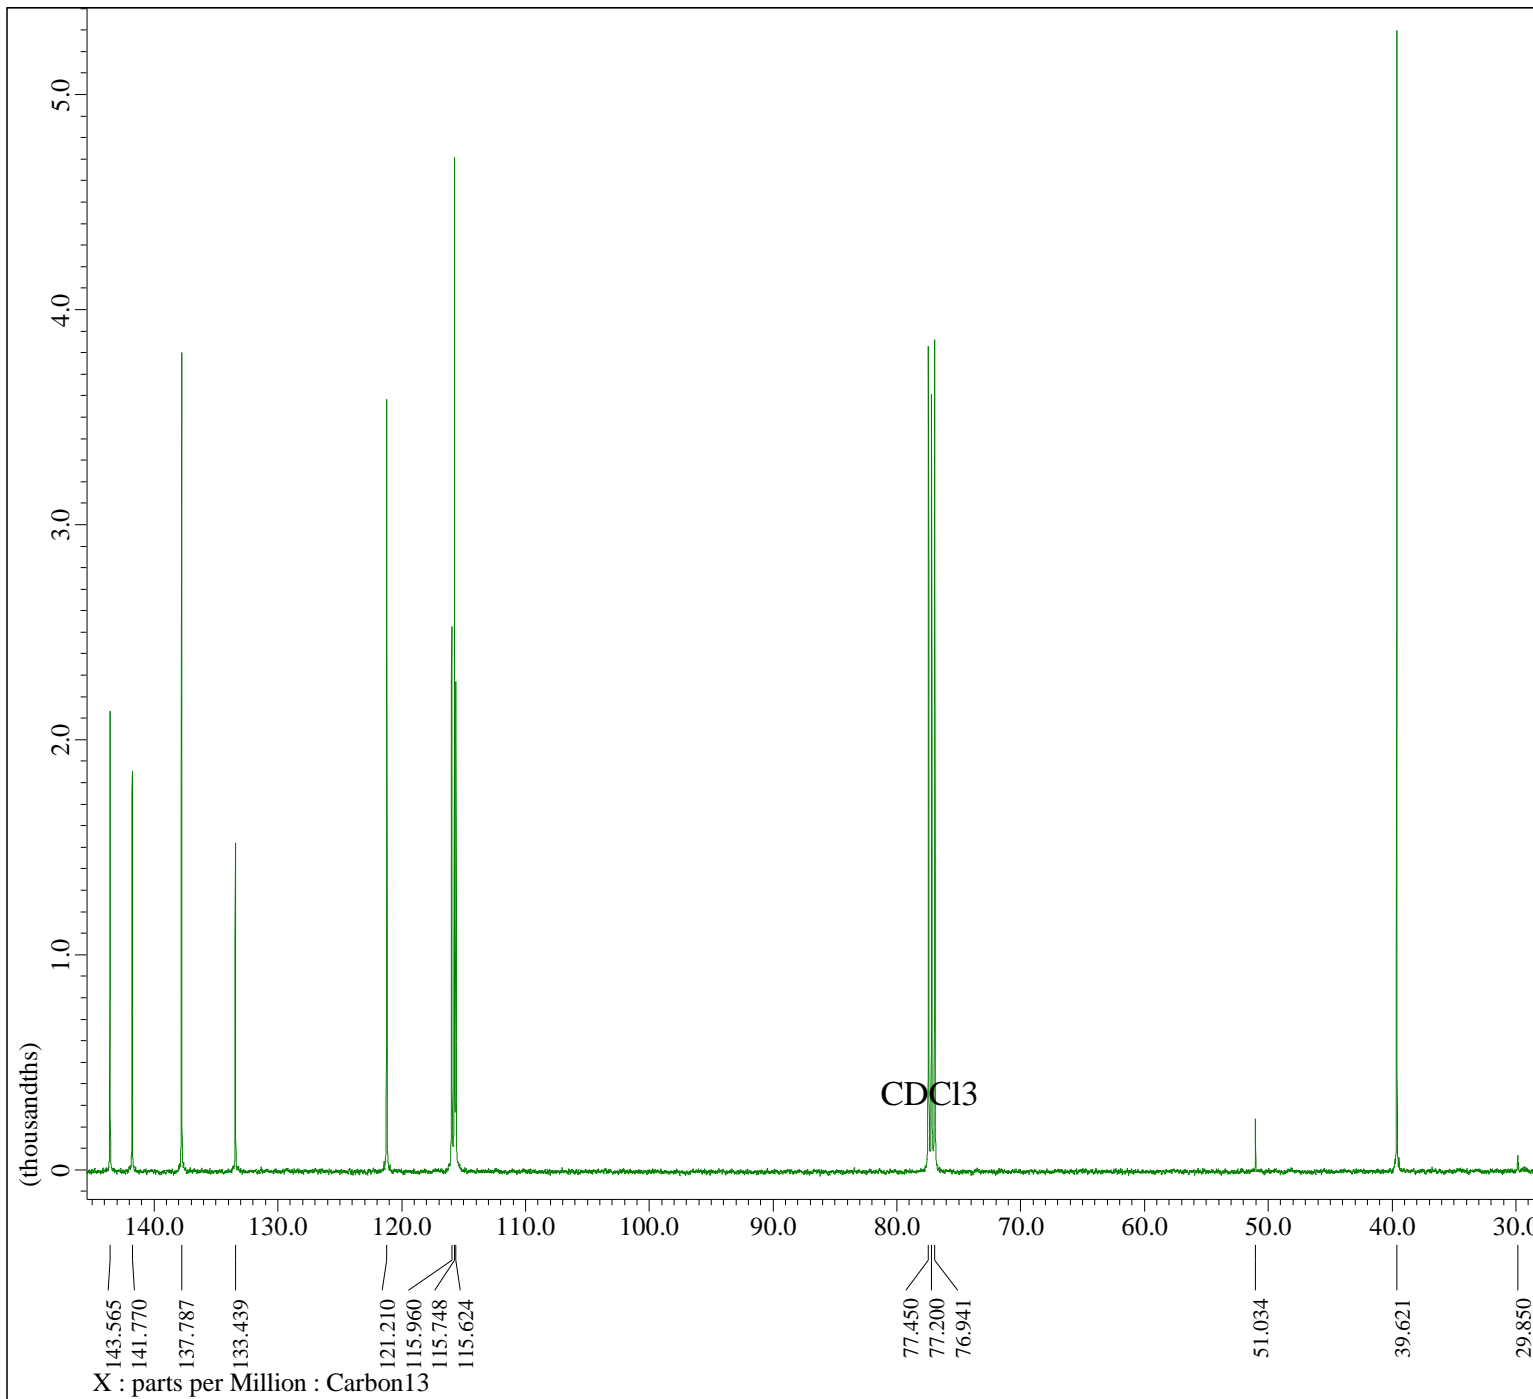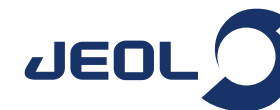

---- PROCESSING PARAMETERS ----  
sexp( 2.0[Hz], 0.0[s] )  
trapezoid( 0[%], 0[%], 80[%], 100[%] )  
zerofill( 1 )  
fft( 1, TRUE, TRUE )  
machinephase  
ppm

Derived from: GEO\_Carbon-1-1.jdf

Filename = GEO\_Carbon-1-2.jdf  
Author = delta  
Experiment = carbon.jxp  
Sample\_Id = GEO  
Solvent = CHLOROFORM-D  
Actual\_Start\_Time = 6-AUG-2019 08:58:  
Revision\_Time = 6-AUG-2019 13:34:

Comment = single pulse decou  
Data\_Format = 1D COMPLEX  
Dim\_Size = 26214  
X\_Domain = Carbon13  
Dim\_Title = Carbon13  
Dim\_Units = [ppm]  
Dimensions = X  
Spectrometer = JNM-ECZ500R/S1

Field\_Strength = 11.7473579[T] (500  
X\_Acq\_Duration = 0.82837504[s]  
X\_Domain = Carbon13  
X\_Freq = 125.76529768[MHz]  
X\_Offset = 100[ppm]  
X\_Points = 32768  
X\_Prescans = 4  
X\_Resolution = 1.20718268[Hz]  
X\_Sweep = 39.55696203[kHz]  
X\_Sweep\_Clipped = 31.64556962[kHz]  
Irr\_Domain = Proton  
Irr\_Freq = 500.15991521[MHz]  
Irr\_Offset = 5.0[ppm]  
Blanking = 2[us]  
Clipped = FALSE  
Scans = 2037  
Total\_Scans = 2037

Relaxation\_Delay = 2[s]  
Recvr\_Gain = 36  
Temp\_Get = 19.2[dC]  
X\_90\_Width = 11.3[us]  
X\_Acq\_Time = 0.82837504[s]  
X\_Angle = 30[deg]  
X\_Atn = 11[dB]  
X\_Pulse = 3.76666667[us]  
Irr\_Atn\_Dec = 30.11[dB]  
Irr\_Atn\_Dec\_Calc = 30.11[dB]  
Irr\_Atn\_Dec\_Default\_Calc = 30.11[dB]  
Irr\_Atn\_No = 30.11[dB]  
Irr\_Dec\_Bandwidth\_Hz = 5.97826087[kHz]

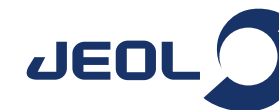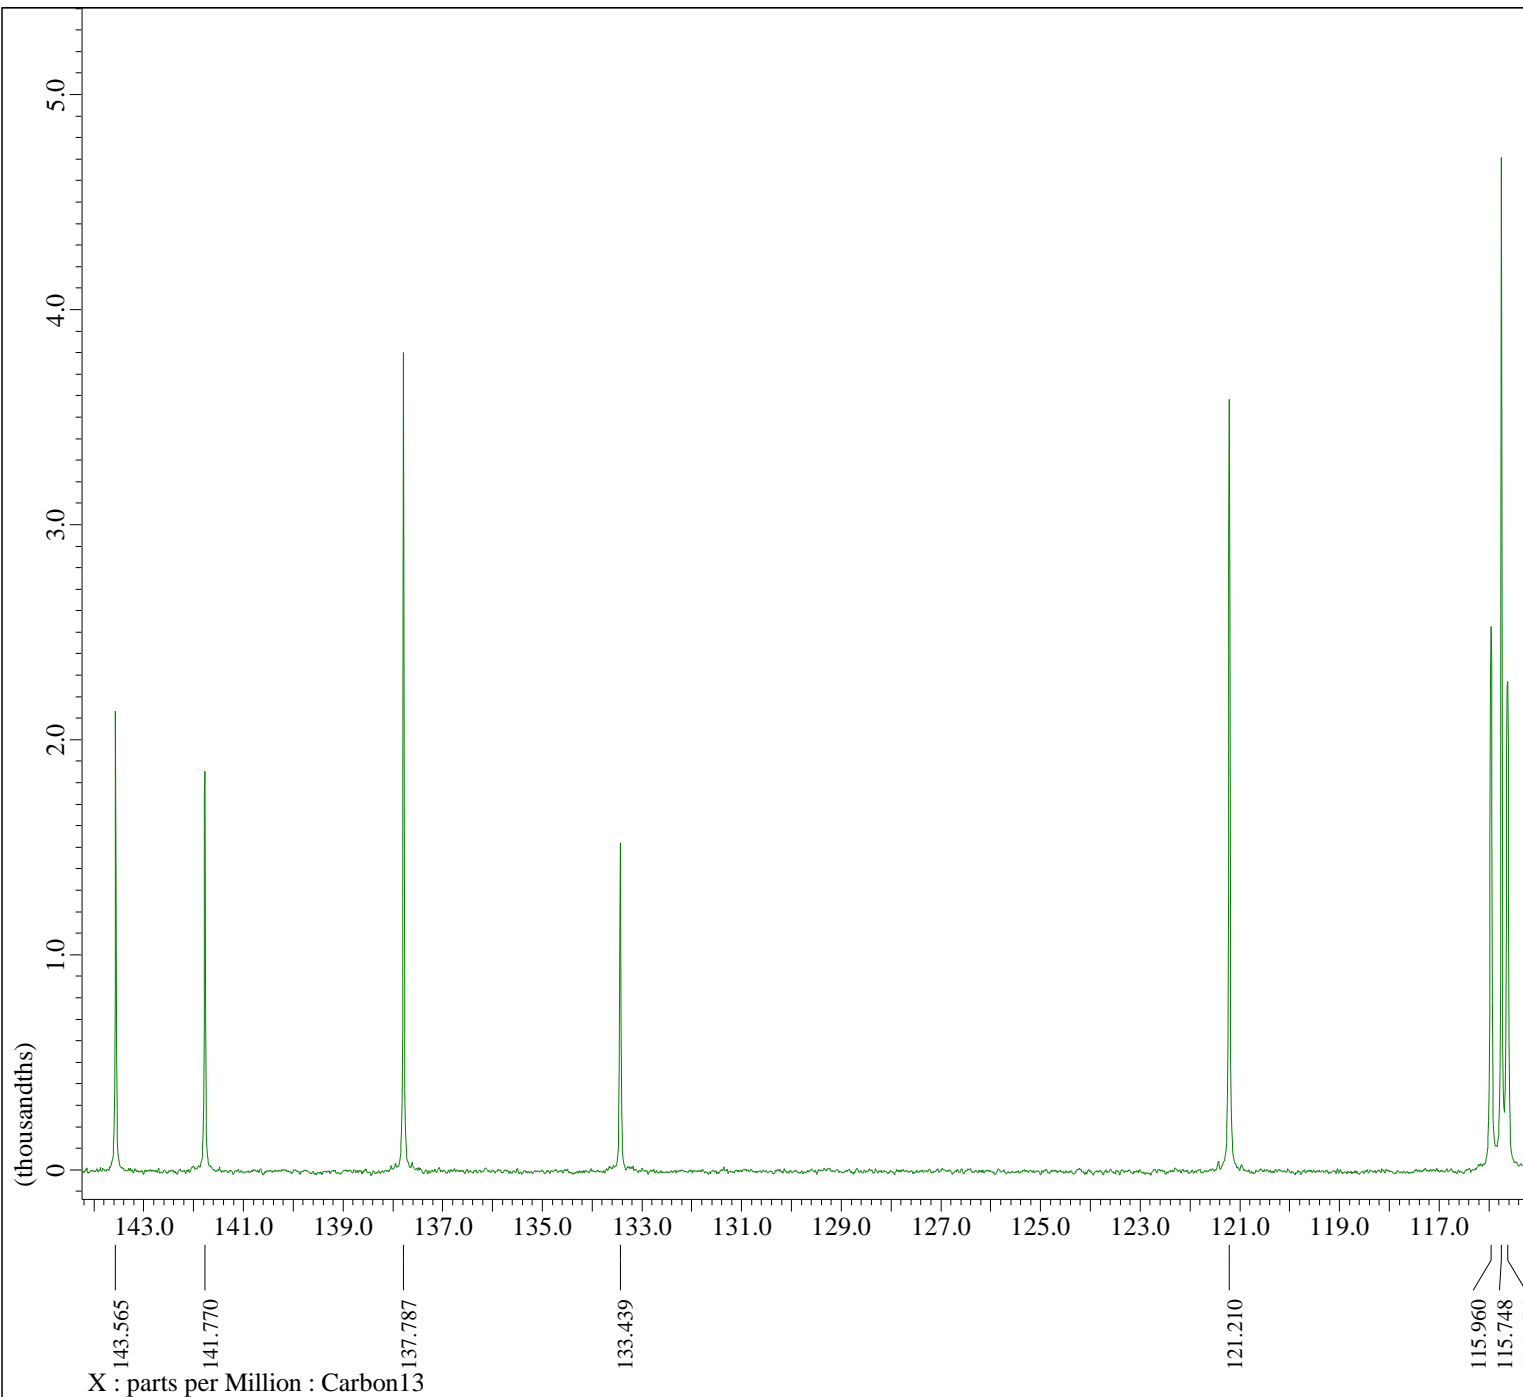

----- PROCESSING PARAMETERS -----  
sexp( 2.0[Hz], 0.0[s] )  
trapezoid( 0[%], 0[%], 80[%], 100[%] )  
zerofill( 1 )  
fft( 1, TRUE, TRUE )  
machinephase  
ppm

Derived from: GEO\_Carbon-1-1.jdf

Filename = GEO\_Carbon-1-2.jdf  
Author = delta  
Experiment = carbon.jxp  
Sample\_Id = GEO  
Solvent = CHLOROFORM-D  
Actual\_Start\_Time = 6-AUG-2019 08:58:  
Revision\_Time = 6-AUG-2019 13:34:

Comment = single pulse decou  
Data\_Format = 1D COMPLEX  
Dim\_Size = 26214  
X\_Domain = Carbon13  
Dim\_Title = Carbon13  
Dim\_Units = [ppm]  
Dimensions = X  
Spectrometer = JNM-ECZ500R/S1

Field\_Strength = 11.7473579[T] (500  
X\_Acq\_Duration = 0.82837504[s]  
X\_Domain = Carbon13  
X\_Freq = 125.76529768[MHz]  
X\_Offset = 100[ppm]  
X\_Points = 32768  
X\_Prescans = 4  
X\_Resolution = 1.20718268[Hz]  
X\_Sweep = 39.55696203[kHz]  
X\_Sweep\_Clippped = 31.64556962[kHz]  
Irr\_Domain = Proton  
Irr\_Freq = 500.15991521[MHz]  
Irr\_Offset = 5.0[ppm]  
Blanking = 2[us]  
Clipped = FALSE  
Scans = 2037  
Total\_Scans = 2037

Relaxation\_Delay = 2[s]  
Recvr\_Gain = 36  
Temp\_Get = 19.2[dC]  
X\_90\_Width = 11.3[us]  
X\_Acq\_Time = 0.82837504[s]  
X\_Angle = 30[deg]  
X\_Atn = 11[dB]  
X\_Pulse = 3.76666667[us]  
Irr\_Atn\_Dec = 30.11[dB]  
Irr\_Atn\_Dec\_Calc = 30.11[dB]  
Irr\_Atn\_Dec\_Default\_Calc = 30.11[dB]  
Irr\_Atn\_No = 30.11[dB]  
Irr\_Dec\_Bandwidth\_Hz = 5.97826087[kHz]

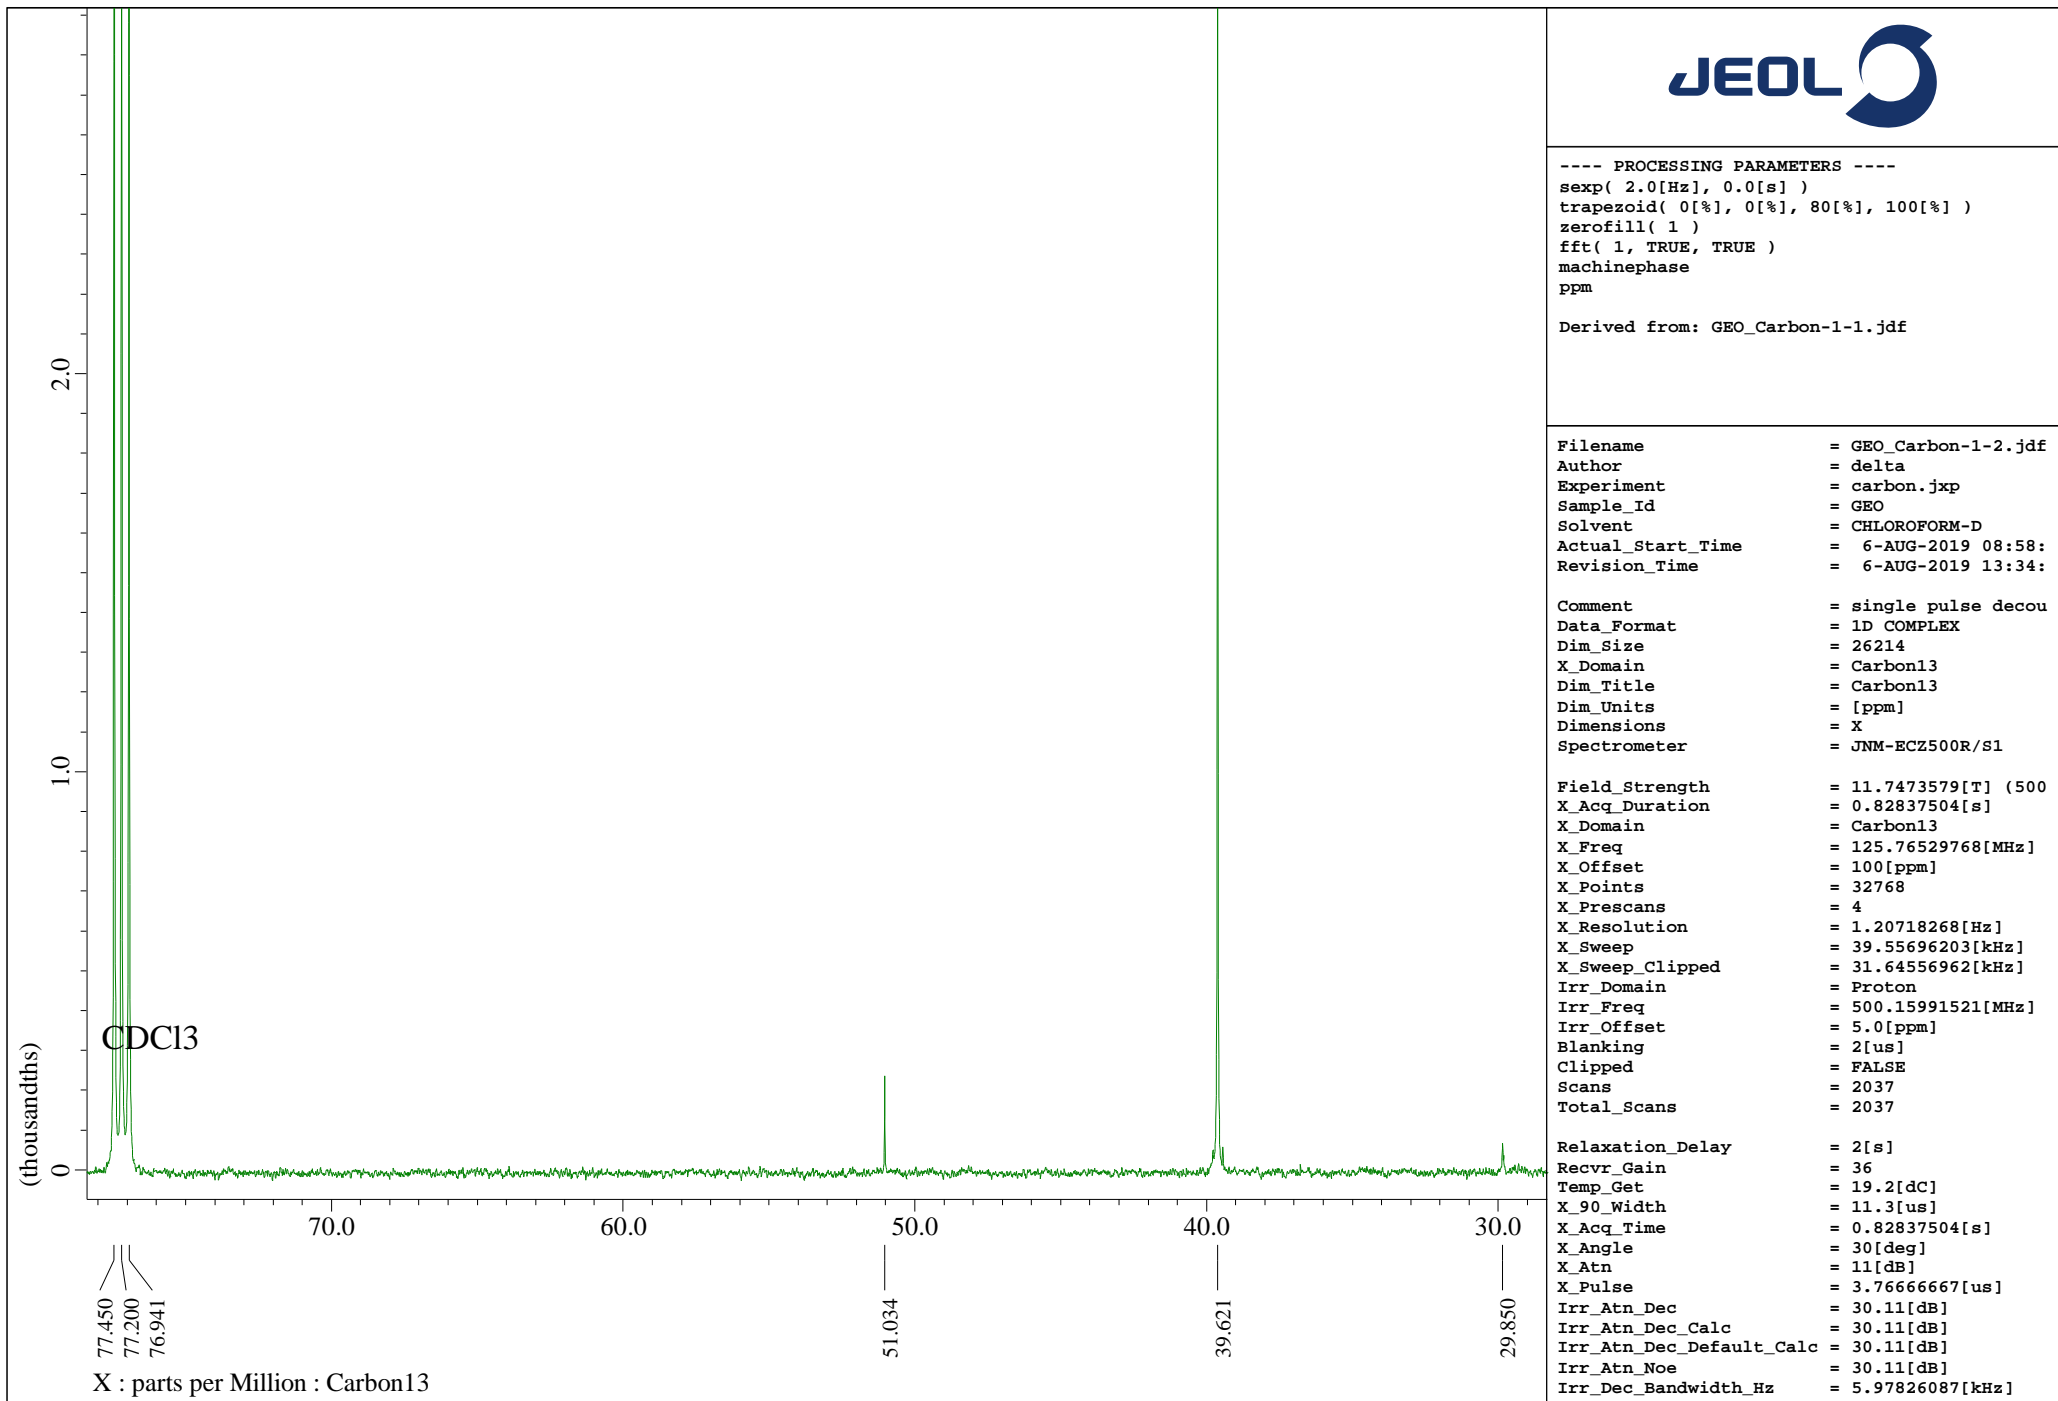

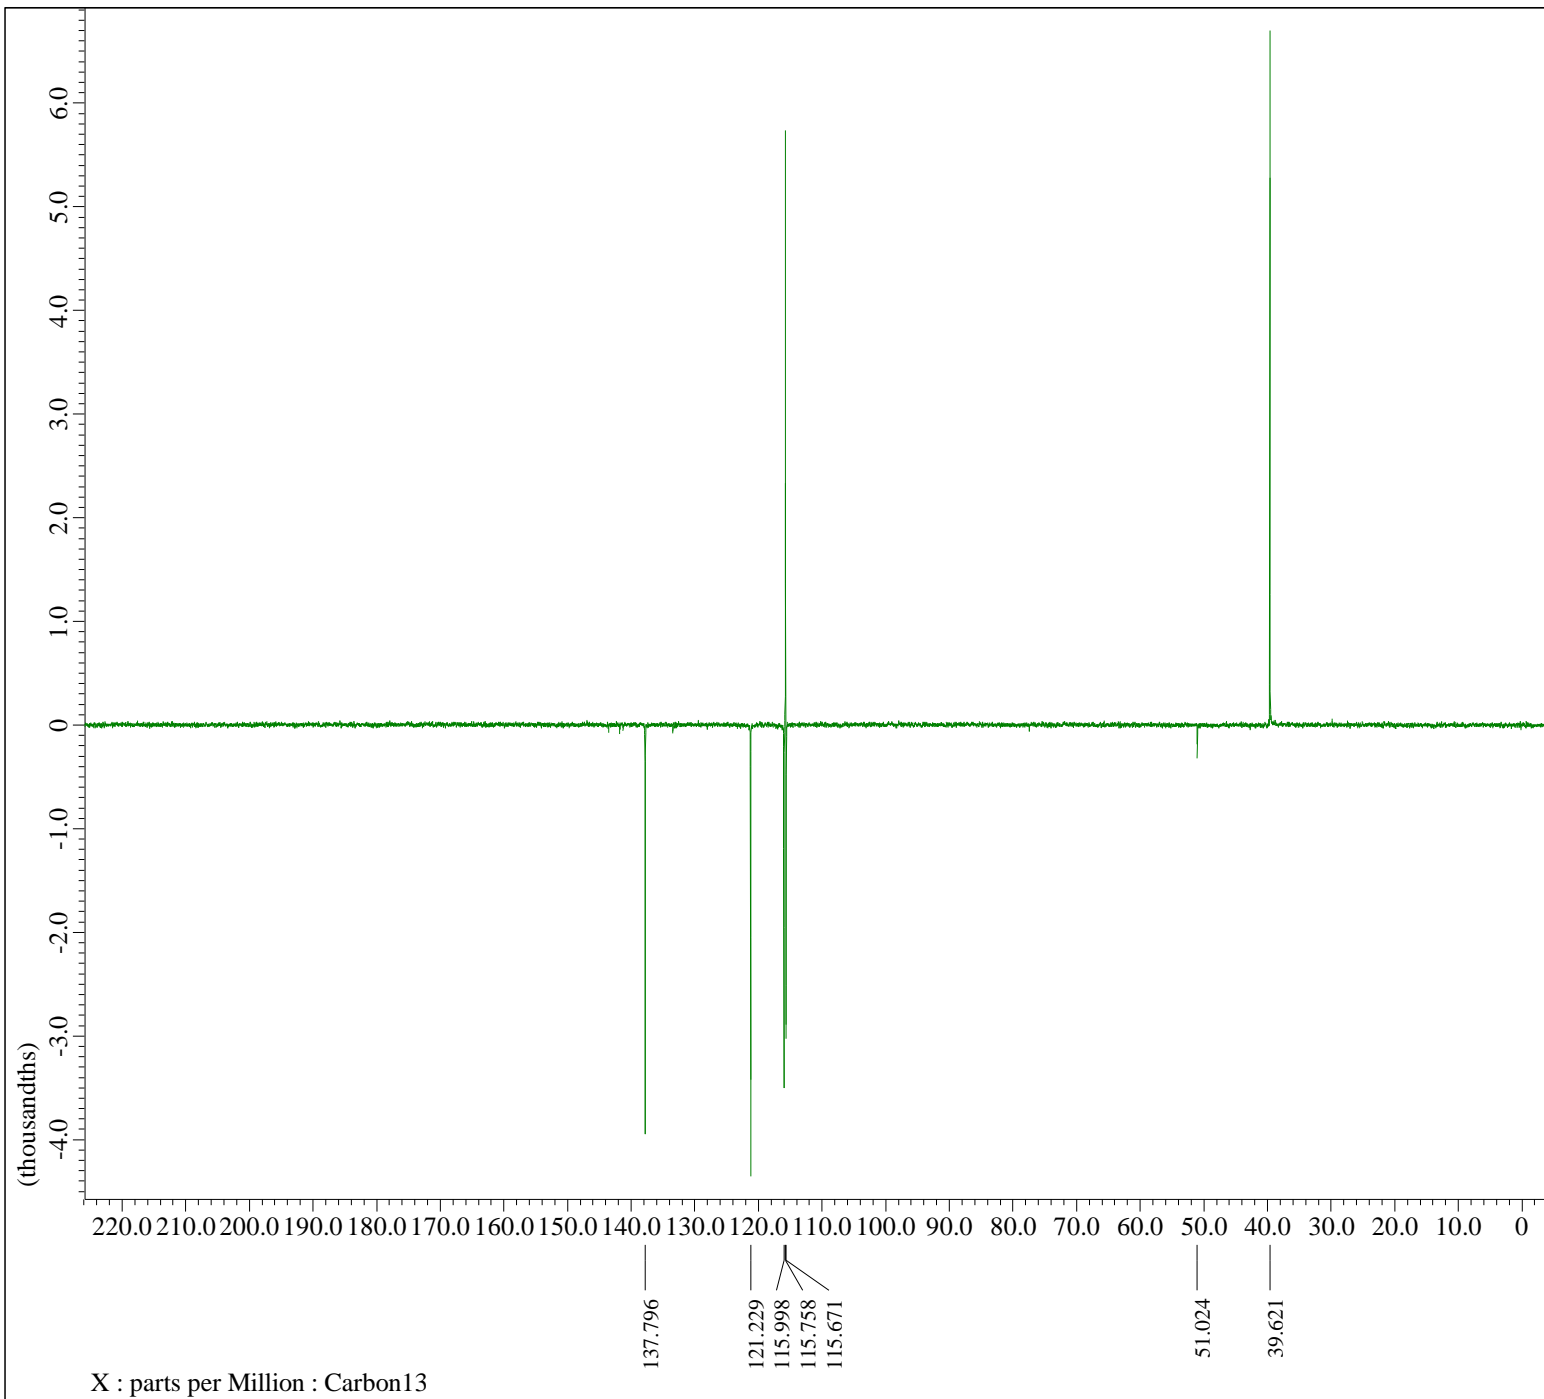

X : parts per Million : Carbon13



---- PROCESSING PARAMETERS ----  
sexp( 2.0[Hz], 0.0[s] )  
trapezoid( 0[%], 0[%], 80[%], 100[%] )  
zerofill( 1 )  
fft( 1, TRUE, TRUE )  
machinephase  
peak\_pick( 0[Hz], 50[Hz], Peaks, 0[Hz] )  
ppm

Derived from: GEO\_DEPT135deg-1-1.jdf

Filename = GEO\_DEPT135deg-1-2  
Author = delta  
Experiment = dept.jxp  
Sample\_Id = GEO  
Solvent = CHLOROFORM-D  
Actual\_Start\_Time = 29-AUG-2019 14:10:  
Revision\_Time = 30-AUG-2019 10:19:

Comment = DEPT with decoupli  
Data\_Format = 1D COMPLEX  
Dim\_Size = 26214  
X\_Domain = Carbon13  
Dim\_Title = Carbon13  
Dim\_Units = [ppm]  
Dimensions = X  
Spectrometer = JNM-ECZ500R/S1

Field\_Strength = 11.7473579[T] (500  
X\_Acq\_Duration = 0.82837504[s]  
X\_Domain = Carbon13  
X\_Freq = 125.76529768[MHz]  
X\_Offset = 100[ppm]  
X\_Points = 32768  
X\_Prescans = 4  
X\_Resolution = 1.20718268[Hz]  
X\_Sweep = 39.55696203[kHz]  
X\_Sweep\_Clippped = 31.64556962[kHz]  
Irr\_Domain = Proton  
Irr\_Freq = 500.15991521[MHz]  
Irr\_Offset = 5.0[ppm]  
Blanking = 2[us]  
Clipped = FALSE  
Scans = 473  
Total\_Scans = 473

Relaxation\_Delay = 2[s]  
Recvr\_Gain = 36  
Temp\_Get = 20.1[dC]  
X\_Acq\_Time = 0.82837504[s]  
X\_Atn = 11[dB]  
X\_Pulse = 11.3[us]  
Irr\_Atn = 8.9[dB]  
Irr\_Atn\_Dec = 30.11[dB]  
Irr\_Atn\_Dec\_Calc = 30.11[dB]  
Irr\_Atn\_Dec\_Default\_Calc = 30.11[dB]  
Irr\_Dec\_Bandwidth\_Hz = 5.97826087[kHz]  
Irr\_Dec\_Bandwidth\_Ppm = 11.9526989[ppm]  
Irr\_Dec\_Freq = 500.15991521[MHz]

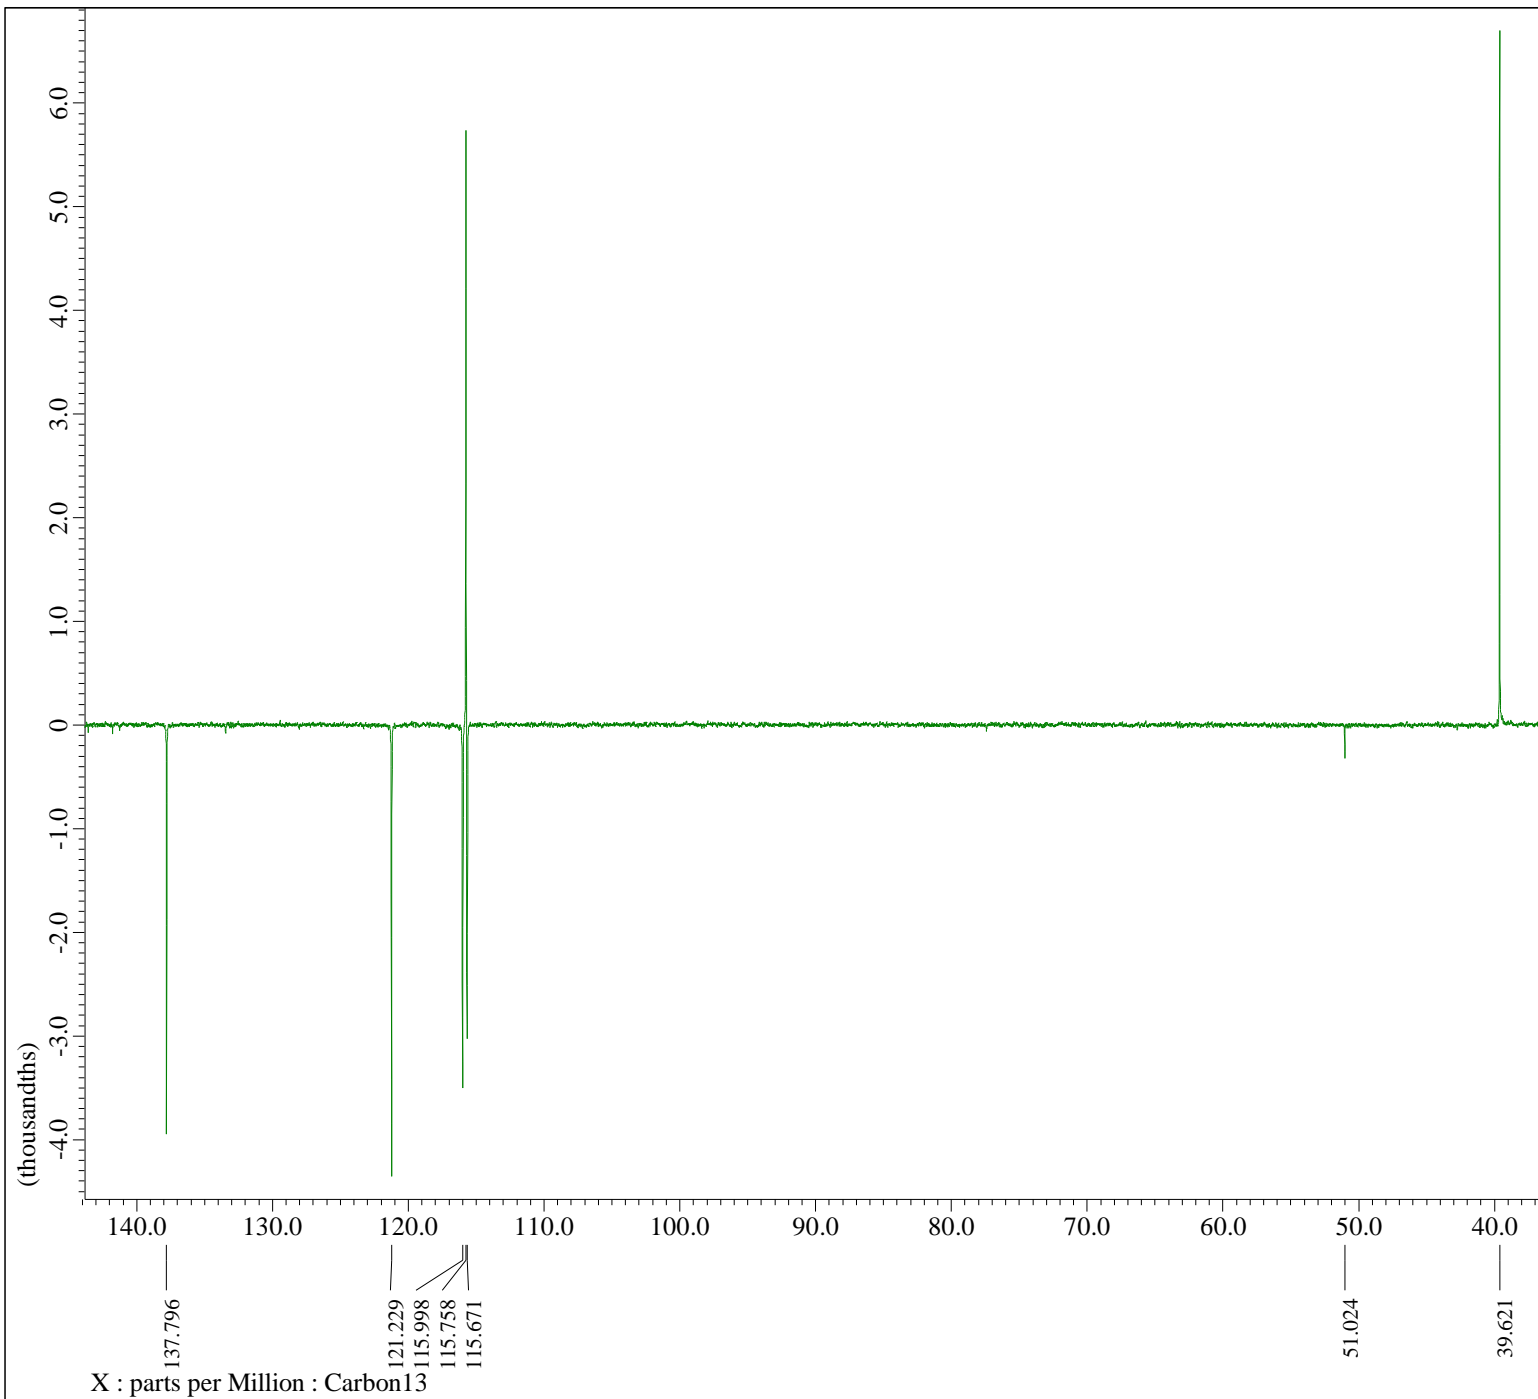

---- PROCESSING PARAMETERS ----  
sexp( 2.0[Hz], 0.0[s] )  
trapezoid( 0[%], 0[%], 80[%], 100[%] )  
zerofill( 1 )  
fft( 1, TRUE, TRUE )  
machinephase  
peak\_pick( 0[Hz], 50[Hz], Peaks, 0[Hz] )  
ppm

Derived from: GEO\_DEPT135deg-1-1.jdf

Filename = GEO\_DEPT135deg-1-2  
Author = delta  
Experiment = dept.jxp  
Sample\_Id = GEO  
Solvent = CHLOROFORM-D  
Actual\_Start\_Time = 29-AUG-2019 14:10:  
Revision\_Time = 30-AUG-2019 10:19:

Comment = DEPT with decoupli  
Data\_Format = 1D COMPLEX  
Dim\_Size = 26214  
X\_Domain = Carbon13  
Dim\_Title = Carbon13  
Dim\_Units = [ppm]  
Dimensions = X  
Spectrometer = JNM-ECZ500R/S1

Field\_Strength = 11.7473579[T] (500  
X\_Acq\_Duration = 0.82837504[s]  
X\_Domain = Carbon13  
X\_Freq = 125.76529768[MHz]  
X\_Offset = 100[ppm]  
X\_Points = 32768  
X\_Prescans = 4  
X\_Resolution = 1.20718268[Hz]  
X\_Sweep = 39.55696203[kHz]  
X\_Sweep\_Clipped = 31.64556962[kHz]  
Irr\_Domain = Proton  
Irr\_Freq = 500.15991521[MHz]  
Irr\_Offset = 5.0[ppm]  
Blanking = 2[us]  
Clipped = FALSE  
Scans = 473  
Total\_Scans = 473

Relaxation\_Delay = 2[s]  
Recvr\_Gain = 36  
Temp\_Get = 20.1[dC]  
X\_Acq\_Time = 0.82837504[s]  
X\_Atn = 11[dB]  
X\_Pulse = 11.3[us]  
Irr\_Atn = 8.9[dB]  
Irr\_Atn\_Dec = 30.11[dB]  
Irr\_Atn\_Dec\_Calc = 30.11[dB]  
Irr\_Atn\_Dec\_Default\_Calc = 30.11[dB]  
Irr\_Dec\_Bandwidth\_Hz = 5.97826087[kHz]  
Irr\_Dec\_Bandwidth\_Ppm = 11.9526989[ppm]  
Irr\_Dec\_Freq = 500.15991521[MHz]

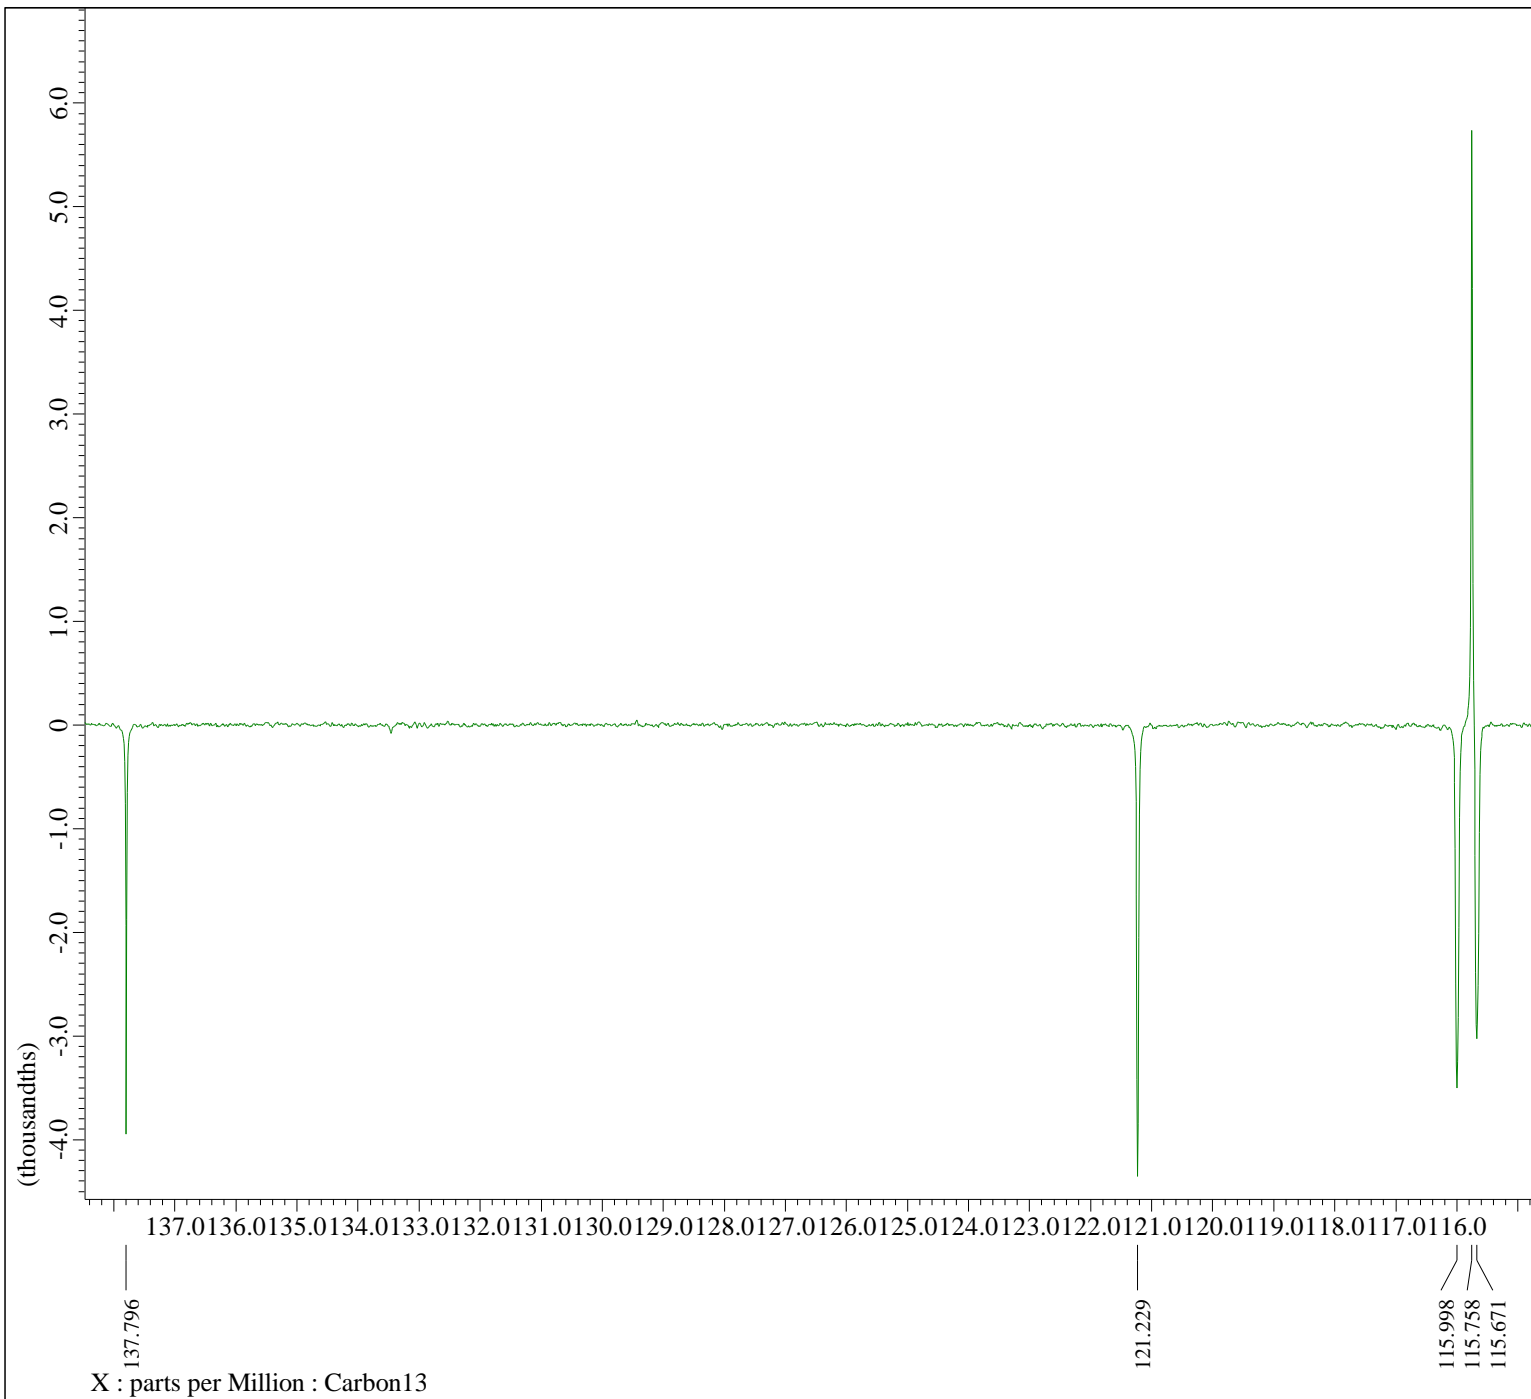

---- PROCESSING PARAMETERS ----  
sexp( 2.0[Hz], 0.0[s] )  
trapezoid( 0[%], 0[%], 80[%], 100[%] )  
zerofill( 1 )  
fft( 1, TRUE, TRUE )  
machinephase  
peak\_pick( 0[Hz], 50[Hz], Peaks, 0[Hz] )  
ppm

Derived from: GEO\_DEPT135deg-1-1.jdf

Filename = GEO\_DEPT135deg-1-2  
Author = delta  
Experiment = dept.jxp  
Sample\_Id = GEO  
Solvent = CHLOROFORM-D  
Actual\_Start\_Time = 29-AUG-2019 14:10:  
Revision\_Time = 30-AUG-2019 10:19:

Comment = DEPT with decoupli  
Data\_Format = 1D COMPLEX  
Dim\_Size = 26214  
X\_Domain = Carbon13  
Dim\_Title = Carbon13  
Dim\_Units = [ppm]  
Dimensions = X  
Spectrometer = JNM-ECZ500R/S1

Field\_Strength = 11.7473579[T] (500  
X\_Acq\_Duration = 0.82837504[s]  
X\_Domain = Carbon13  
X\_Freq = 125.76529768[MHz]  
X\_Offset = 100[ppm]  
X\_Points = 32768  
X\_Prescans = 4  
X\_Resolution = 1.20718268[Hz]  
X\_Sweep = 39.55696203[kHz]  
X\_Sweep\_Clipped = 31.64556962[kHz]  
Irr\_Domain = Proton  
Irr\_Freq = 500.15991521[MHz]  
Irr\_Offset = 5.0[ppm]  
Blanking = 2[us]  
Clipped = FALSE  
Scans = 473  
Total\_Scans = 473

Relaxation\_Delay = 2[s]  
Recvr\_Gain = 36  
Temp\_Get = 20.1[dC]  
X\_Acq\_Time = 0.82837504[s]  
X\_Atn = 11[dB]  
X\_Pulse = 11.3[us]  
Irr\_Atn = 8.9[dB]  
Irr\_Atn\_Dec = 30.11[dB]  
Irr\_Atn\_Dec\_Calc = 30.11[dB]  
Irr\_Atn\_Dec\_Default\_Calc = 30.11[dB]  
Irr\_Dec\_Bandwidth\_Hz = 5.97826087[kHz]  
Irr\_Dec\_Bandwidth\_Ppm = 11.9526989[ppm]  
Irr\_Dec\_Freq = 500.15991521[MHz]

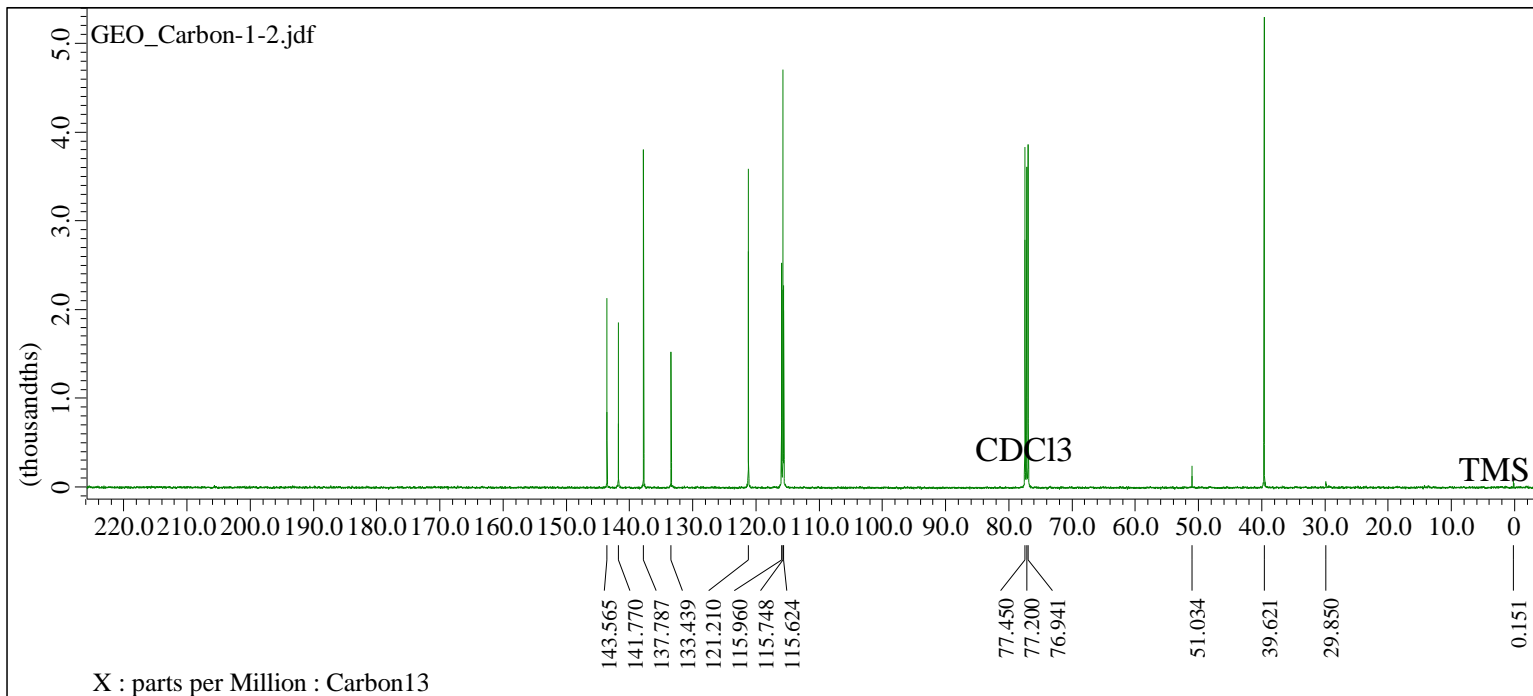

---- PROCESSING PARAMETERS ----  
sexp( 2.0[Hz], 0.0[s] )  
trapezoid( 0[%], 0[%], 80[%], 100[%] )  
zerofill( 1 )  
fft( 1, TRUE, TRUE )  
machinephase  
ppm

Filename = GEO\_Carbon-1-2.jdf  
Author = delta  
Experiment = carbon.jxp  
Sample\_Id = GEO  
Solvent = CHLOROFORM-D  
Actual\_Start\_Time = 6-AUG-2019 08:58:  
Revision\_Time = 6-AUG-2019 13:34:

Comment = single pulse decou  
Data\_Format = 1D COMPLEX  
Dim\_Size = 26214  
X\_Domain = Carbon13  
Dim\_Title = Carbon13  
Dim\_Units = [ppm]  
Dimensions = X  
Spectrometer = JNM-ECZ500R/S1

Field\_Strength = 11.7473579[T] (500  
X\_Acq\_Duration = 0.82837504[s]  
X\_Domain = Carbon13  
X\_Freq = 125.76529768[MHz]  
X\_Offset = 100[ppm]  
X\_Points = 32768  
X\_Prescans = 4  
X\_Resolution = 1.20718268[Hz]  
X\_Sweep = 39.55696203[kHz]  
X\_Sweep\_Clippped = 31.64556962[kHz]  
Irr\_Domain = Proton  
Irr\_Freq = 500.15991521[MHz]  
Irr\_Offset = 5.0[ppm]  
Blanking = 2[us]  
Clipped = FALSE  
Scans = 2037  
Total\_Scans = 2037

Relaxation\_Delay = 2[s]  
Recvr\_Gain = 36  
Temp\_Get = 19.2[dC]  
X\_90\_Width = 11.3[us]  
X\_Acq\_Time = 0.82837504[s]  
X\_Angle = 30[deg]  
X\_Atn = 11[dB]  
X\_Pulse = 3.76666667[us]  
Irr\_Atn\_Dec = 30.11[dB]  
Irr\_Atn\_Dec\_Calc = 30.11[dB]  
Irr\_Atn\_Dec\_Default\_Calc = 30.11[dB]  
Irr\_Atn\_No = 30.11[dB]  
Irr\_Dec\_Bandwidth\_Hz = 5.97826087[kHz]

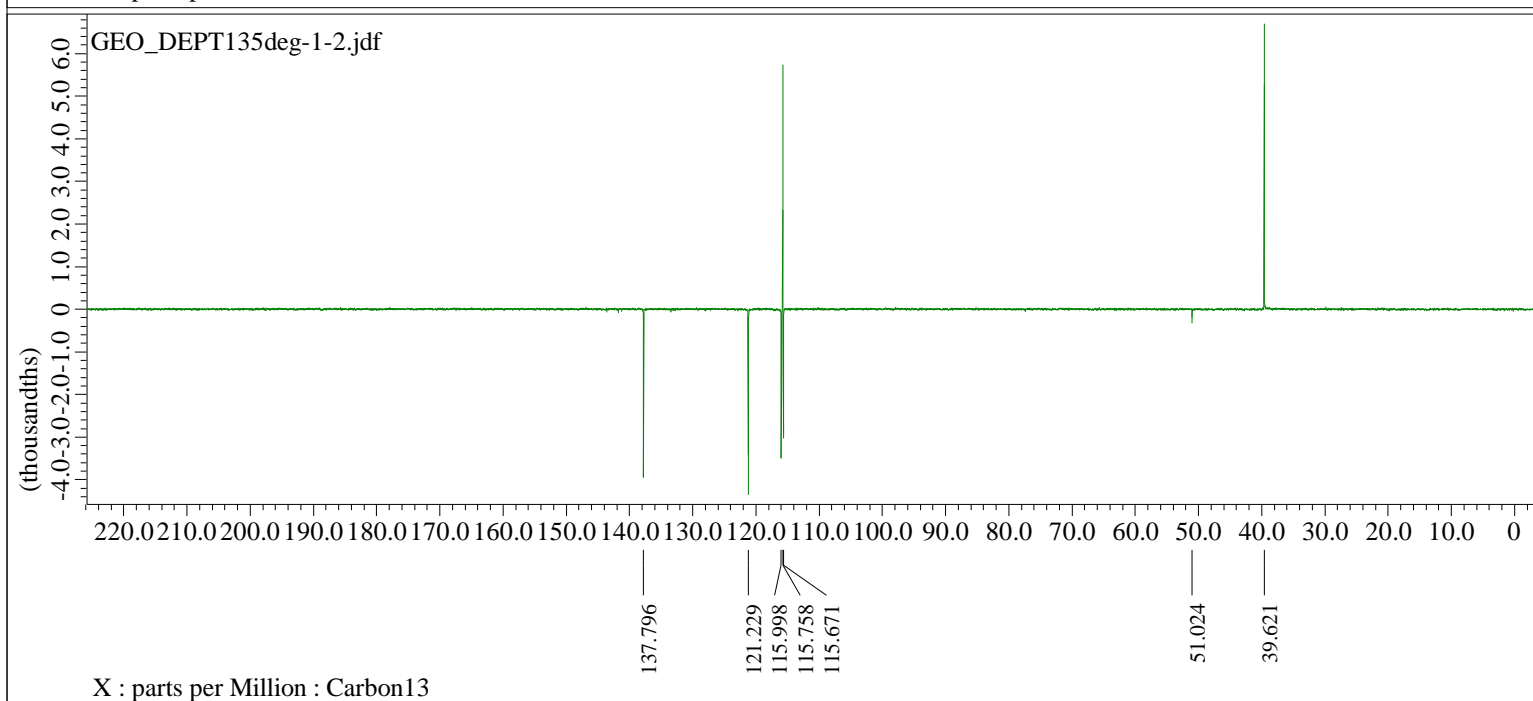

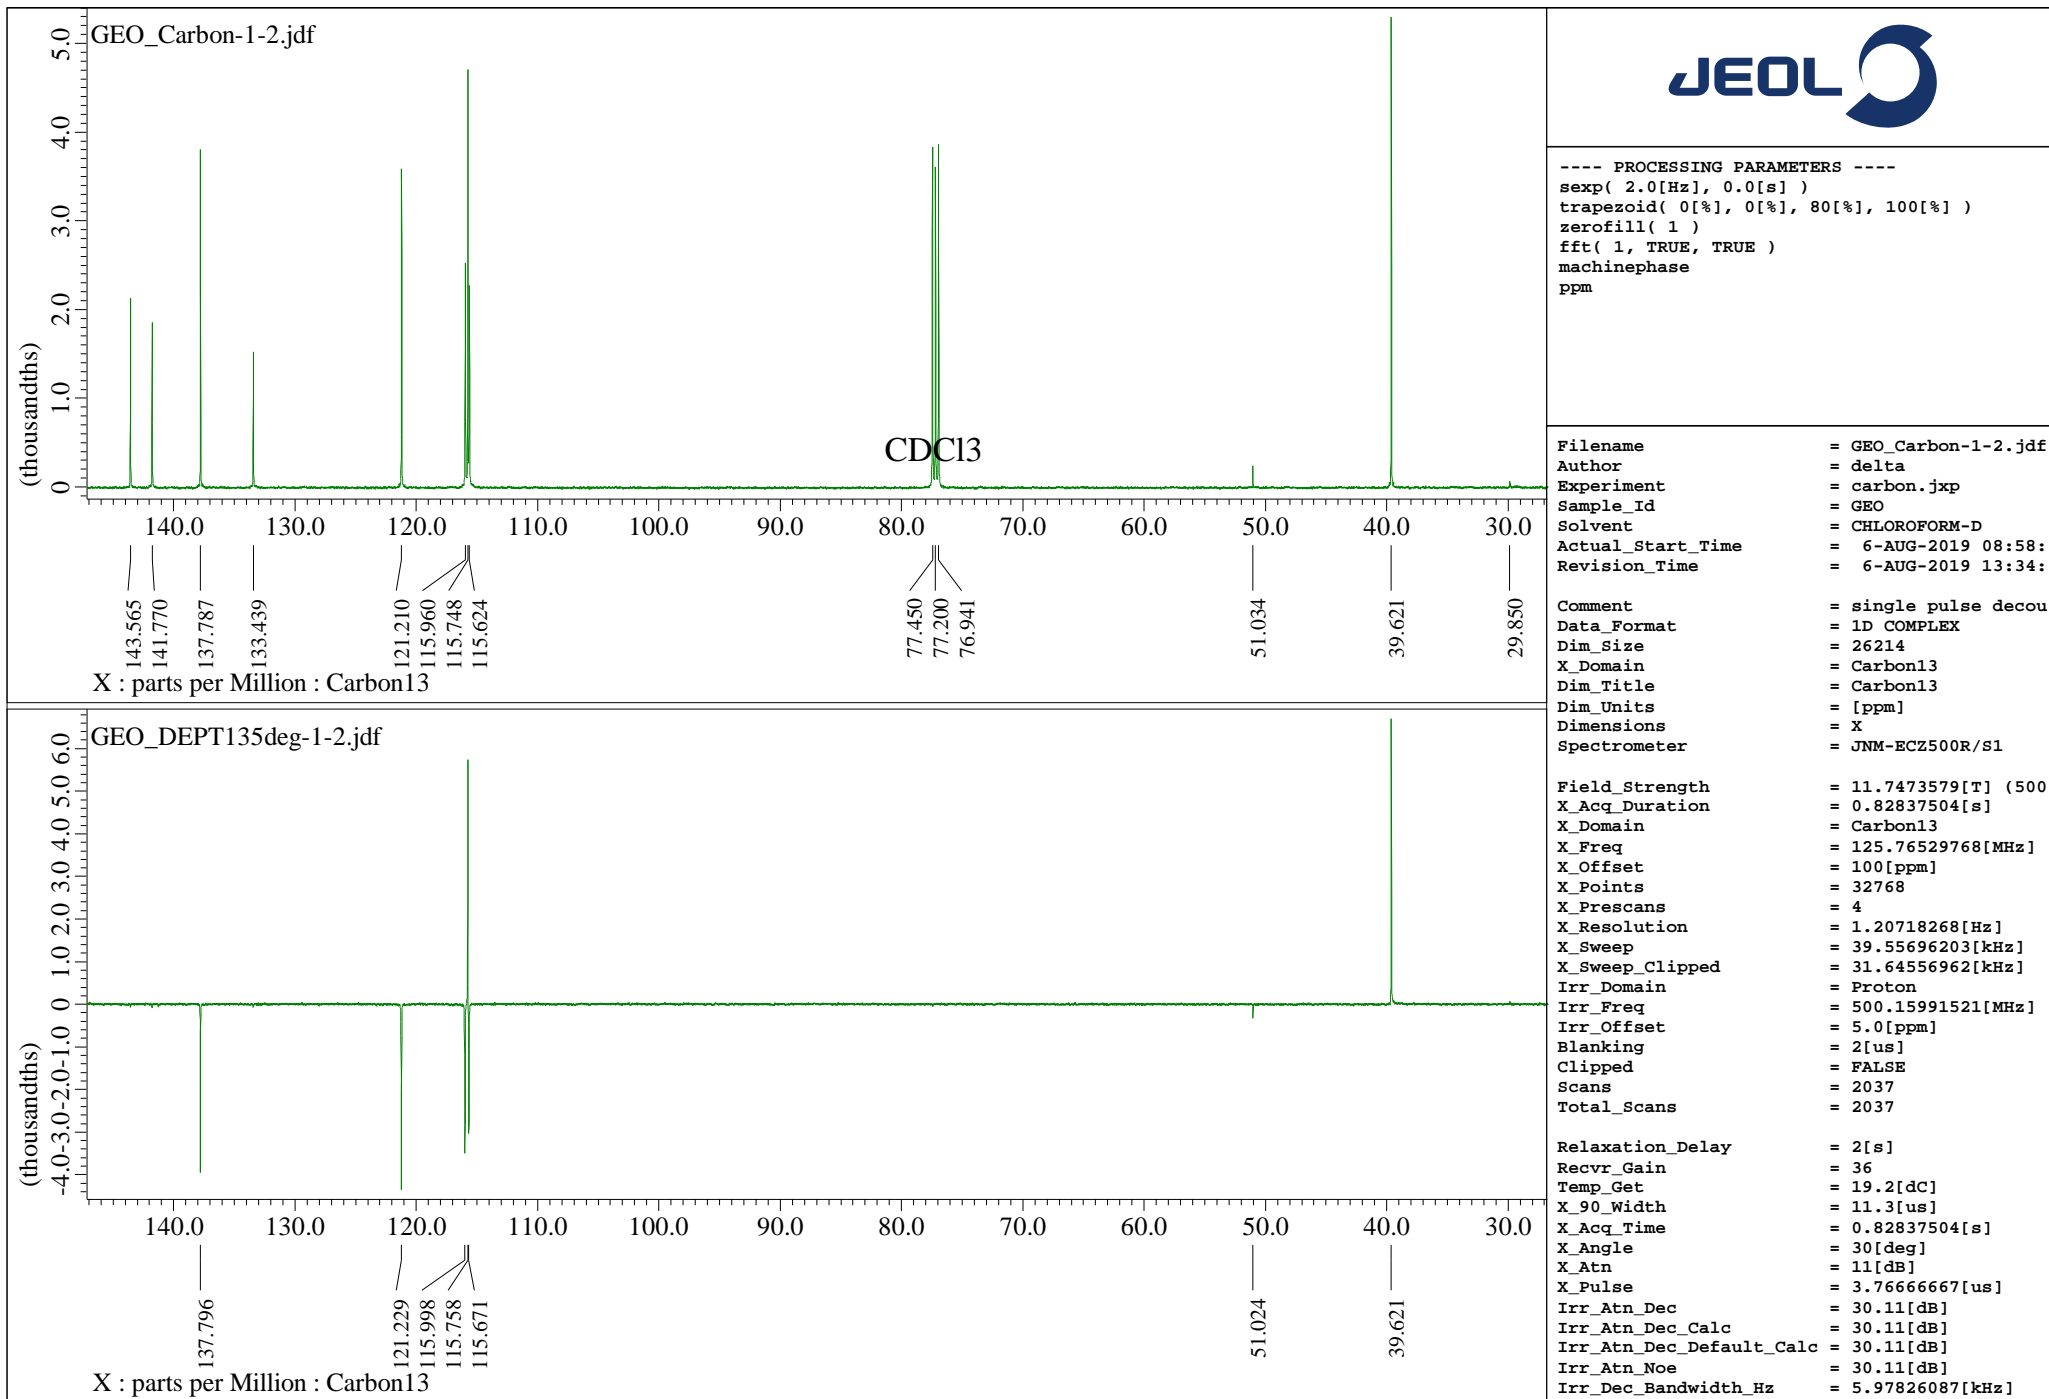



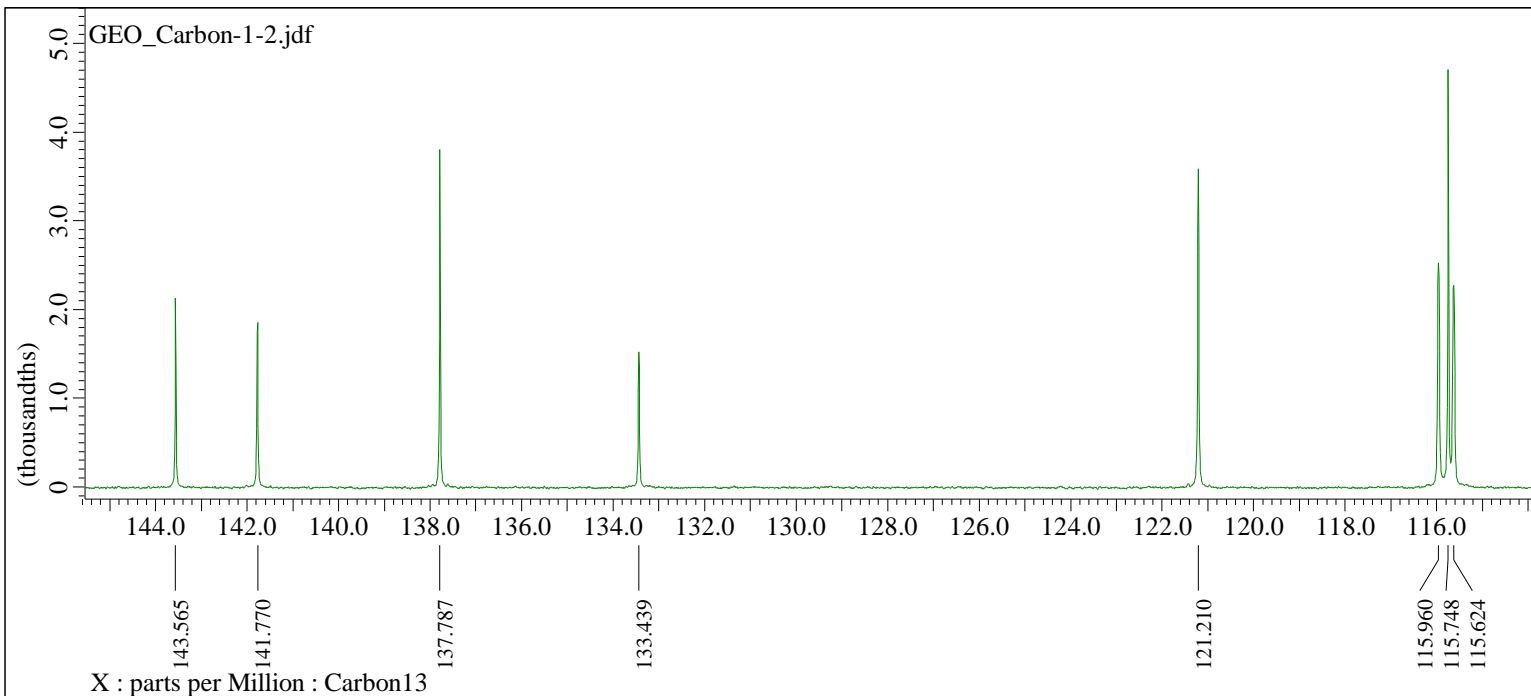

---- PROCESSING PARAMETERS ----  
sexp( 2.0[Hz], 0.0[s] )  
trapezoid( 0[%], 0[%], 80[%], 100[%] )  
zerofill( 1 )  
fft( 1, TRUE, TRUE )  
machinephase  
ppm

Filename = GEO\_Carbon-1-2.jdf  
Author = delta  
Experiment = carbon.jxp  
Sample\_Id = GEO  
Solvent = CHLOROFORM-D  
Actual\_Start\_Time = 6-AUG-2019 08:58:  
Revision\_Time = 6-AUG-2019 13:34:

Comment = single pulse decou  
Data\_Format = 1D COMPLEX  
Dim\_Size = 26214  
X\_Domain = Carbon13  
Dim\_Title = Carbon13  
Dim\_Units = [ppm]  
Dimensions = X  
Spectrometer = JNM-ECZ500R/S1

Field\_Strength = 11.7473579[T] (500  
X\_Acq\_Duration = 0.82837504[s]  
X\_Domain = Carbon13  
X\_Freq = 125.76529768[MHz]  
X\_Offset = 100[ppm]  
X\_Points = 32768  
X\_Prescans = 4  
X\_Resolution = 1.20718268[Hz]  
X\_Sweep = 39.55696203[kHz]  
X\_Sweep\_Clipped = 31.64556962[kHz]  
Irr\_Domain = Proton  
Irr\_Freq = 500.15991521[MHz]  
Irr\_Offset = 5.0[ppm]  
Blanking = 2[us]  
Clipped = FALSE  
Scans = 2037  
Total\_Scans = 2037

Relaxation\_Delay = 2[s]  
Recvr\_Gain = 36  
Temp\_Get = 19.2[dC]  
X\_90\_Width = 11.3[us]  
X\_Acq\_Time = 0.82837504[s]  
X\_Angle = 30[deg]  
X\_Atn = 11[dB]  
X\_Pulse = 3.76666667[us]  
Irr\_Atn\_Dec = 30.11[dB]  
Irr\_Atn\_Dec\_Calc = 30.11[dB]  
Irr\_Atn\_Dec\_Default\_Calc = 30.11[dB]  
Irr\_Atn\_No = 30.11[dB]  
Irr\_Dec\_Bandwidth\_Hz = 5.97826087[kHz]

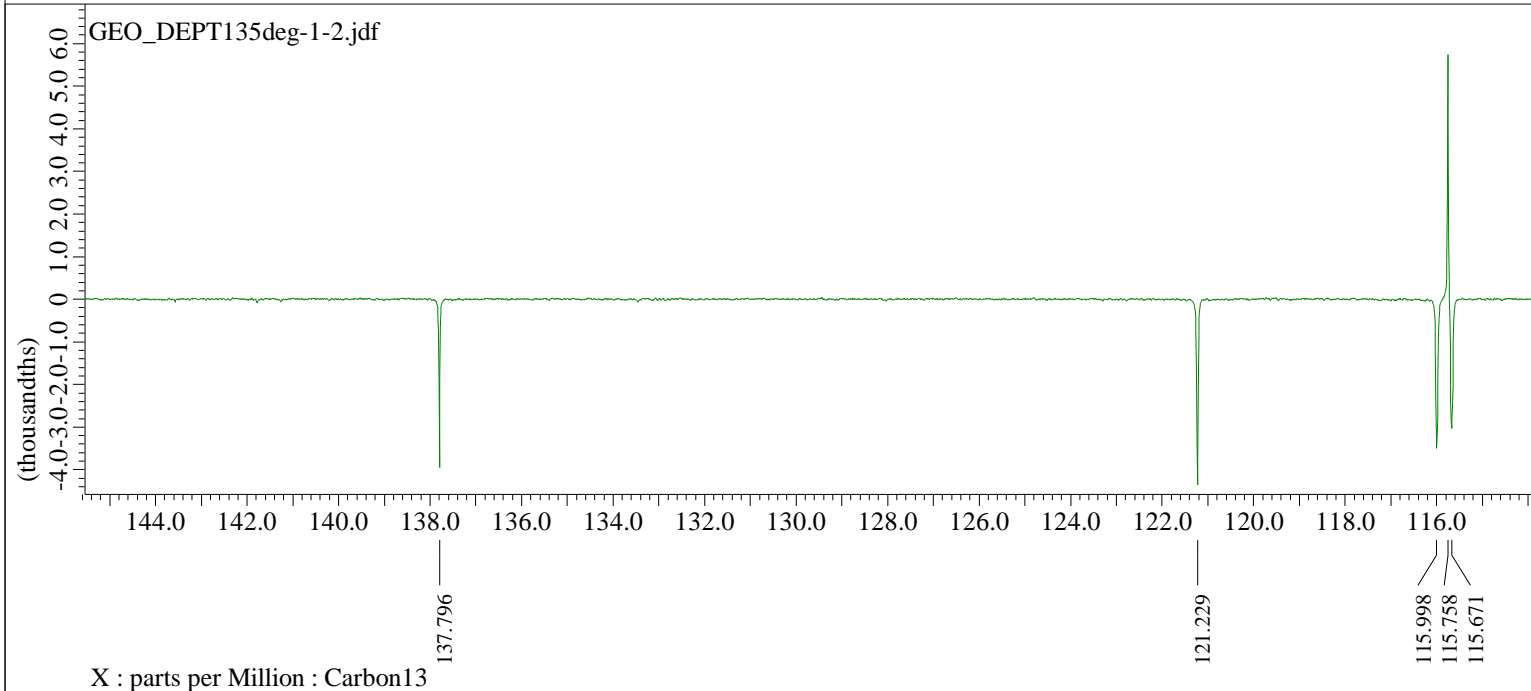

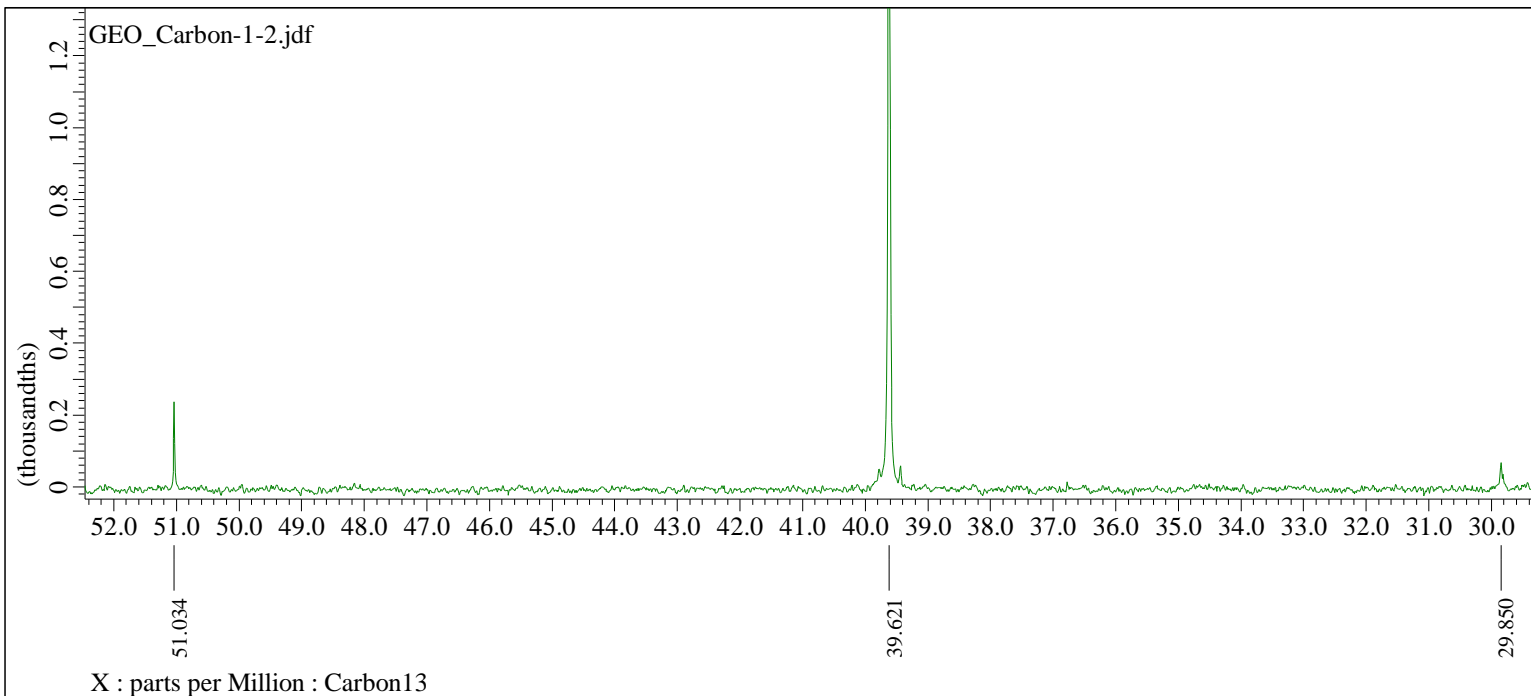

---- PROCESSING PARAMETERS ----  
sexp( 2.0[Hz], 0.0[s] )  
trapezoid( 0[%], 0[%], 80[%], 100[%] )  
zerofill( 1 )  
fft( 1, TRUE, TRUE )  
machinephase  
peak\_pick( 0[Hz], 50[Hz], Peaks, 0[Hz] )  
ppm

Filename = GEO\_DEPT135deg-1-2  
Author = delta  
Experiment = dept.jxp  
Sample\_Id = GEO  
Solvent = CHLOROFORM-D  
Actual\_Start\_Time = 29-AUG-2019 14:10:  
Revision\_Time = 30-AUG-2019 10:22:

Comment = DEPT with decoupli  
Data\_Format = 1D COMPLEX  
Dim\_Size = 26214  
X\_Domain = Carbon13  
Dim\_Title = Carbon13  
Dim\_Units = [ppm]  
Dimensions = X  
Spectrometer = JNM-ECZ500R/S1

Field\_Strength = 11.7473579[T] (500  
X\_Acq\_Duration = 0.82837504[s]  
X\_Domain = Carbon13  
X\_Freq = 125.76529768[MHz]  
X\_Offset = 100[ppm]  
X\_Points = 32768  
X\_Prescans = 4  
X\_Resolution = 1.20718268[Hz]  
X\_Sweep = 39.55696203[kHz]  
X\_Sweep\_Clippped = 31.64556962[kHz]  
Irr\_Domain = Proton  
Irr\_Freq = 500.15991521[MHz]  
Irr\_Offset = 5.0[ppm]  
Blanking = 2[us]  
Clipped = FALSE  
Scans = 473  
Total\_Scans = 473

Relaxation\_Delay = 2[s]  
Recvr\_Gain = 36  
Temp\_Get = 20.1[dC]  
X\_Acq\_Time = 0.82837504[s]  
X\_Atn = 11[dB]  
X\_Pulse = 11.3[us]  
Irr\_Atn = 8.9[dB]  
Irr\_Atn\_Dec = 30.11[dB]  
Irr\_Atn\_Dec\_Calc = 30.11[dB]  
Irr\_Atn\_Dec\_Default\_Calc = 30.11[dB]  
Irr\_Dec\_Bandwidth\_Hz = 5.97826087[kHz]  
Irr\_Dec\_Bandwidth\_Ppm = 11.9526989[ppm]  
Irr\_Dec\_Freq = 500.15991521[MHz]

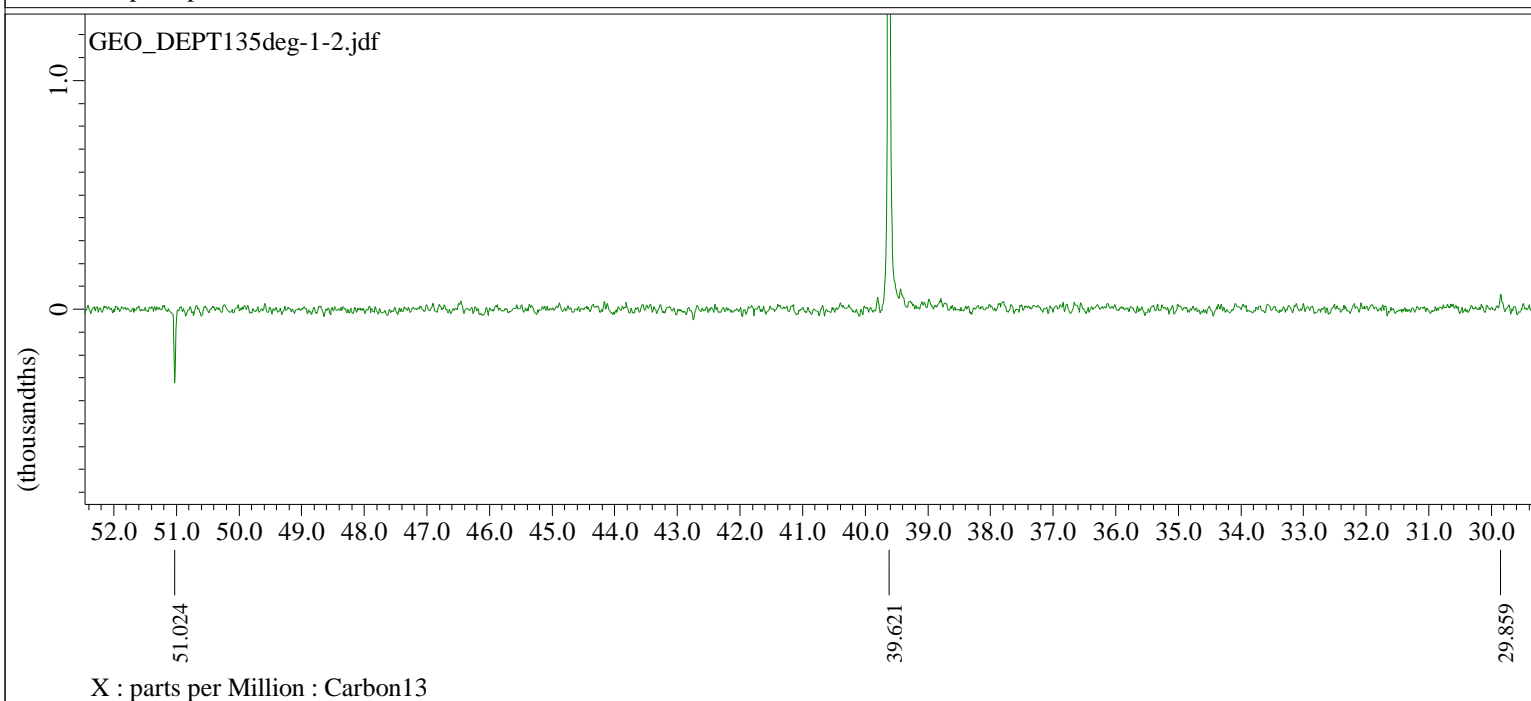

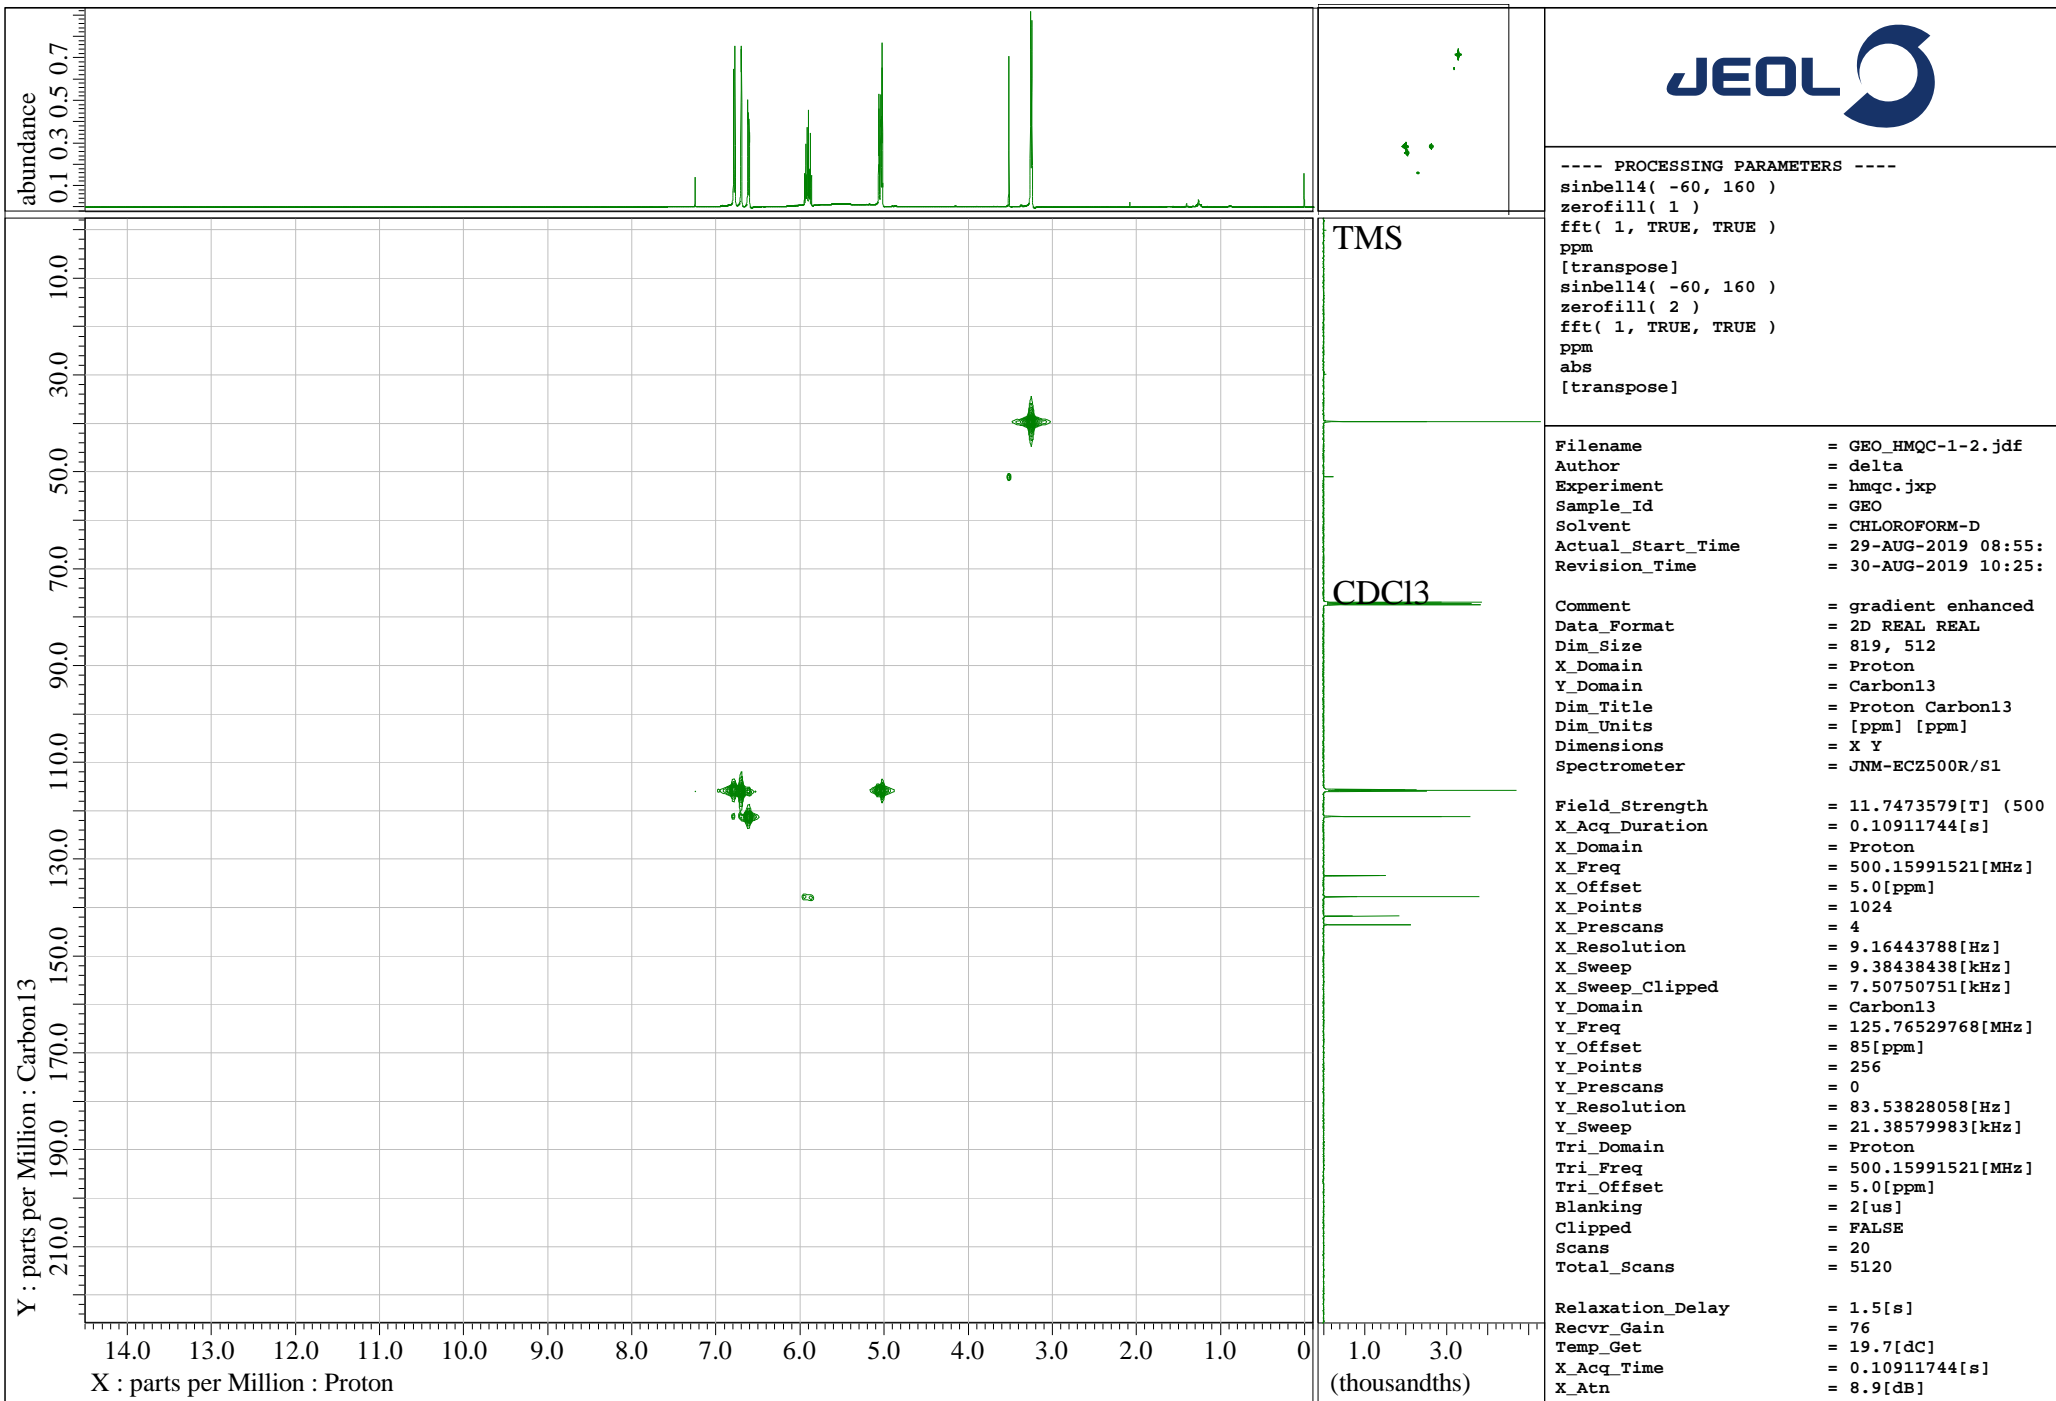

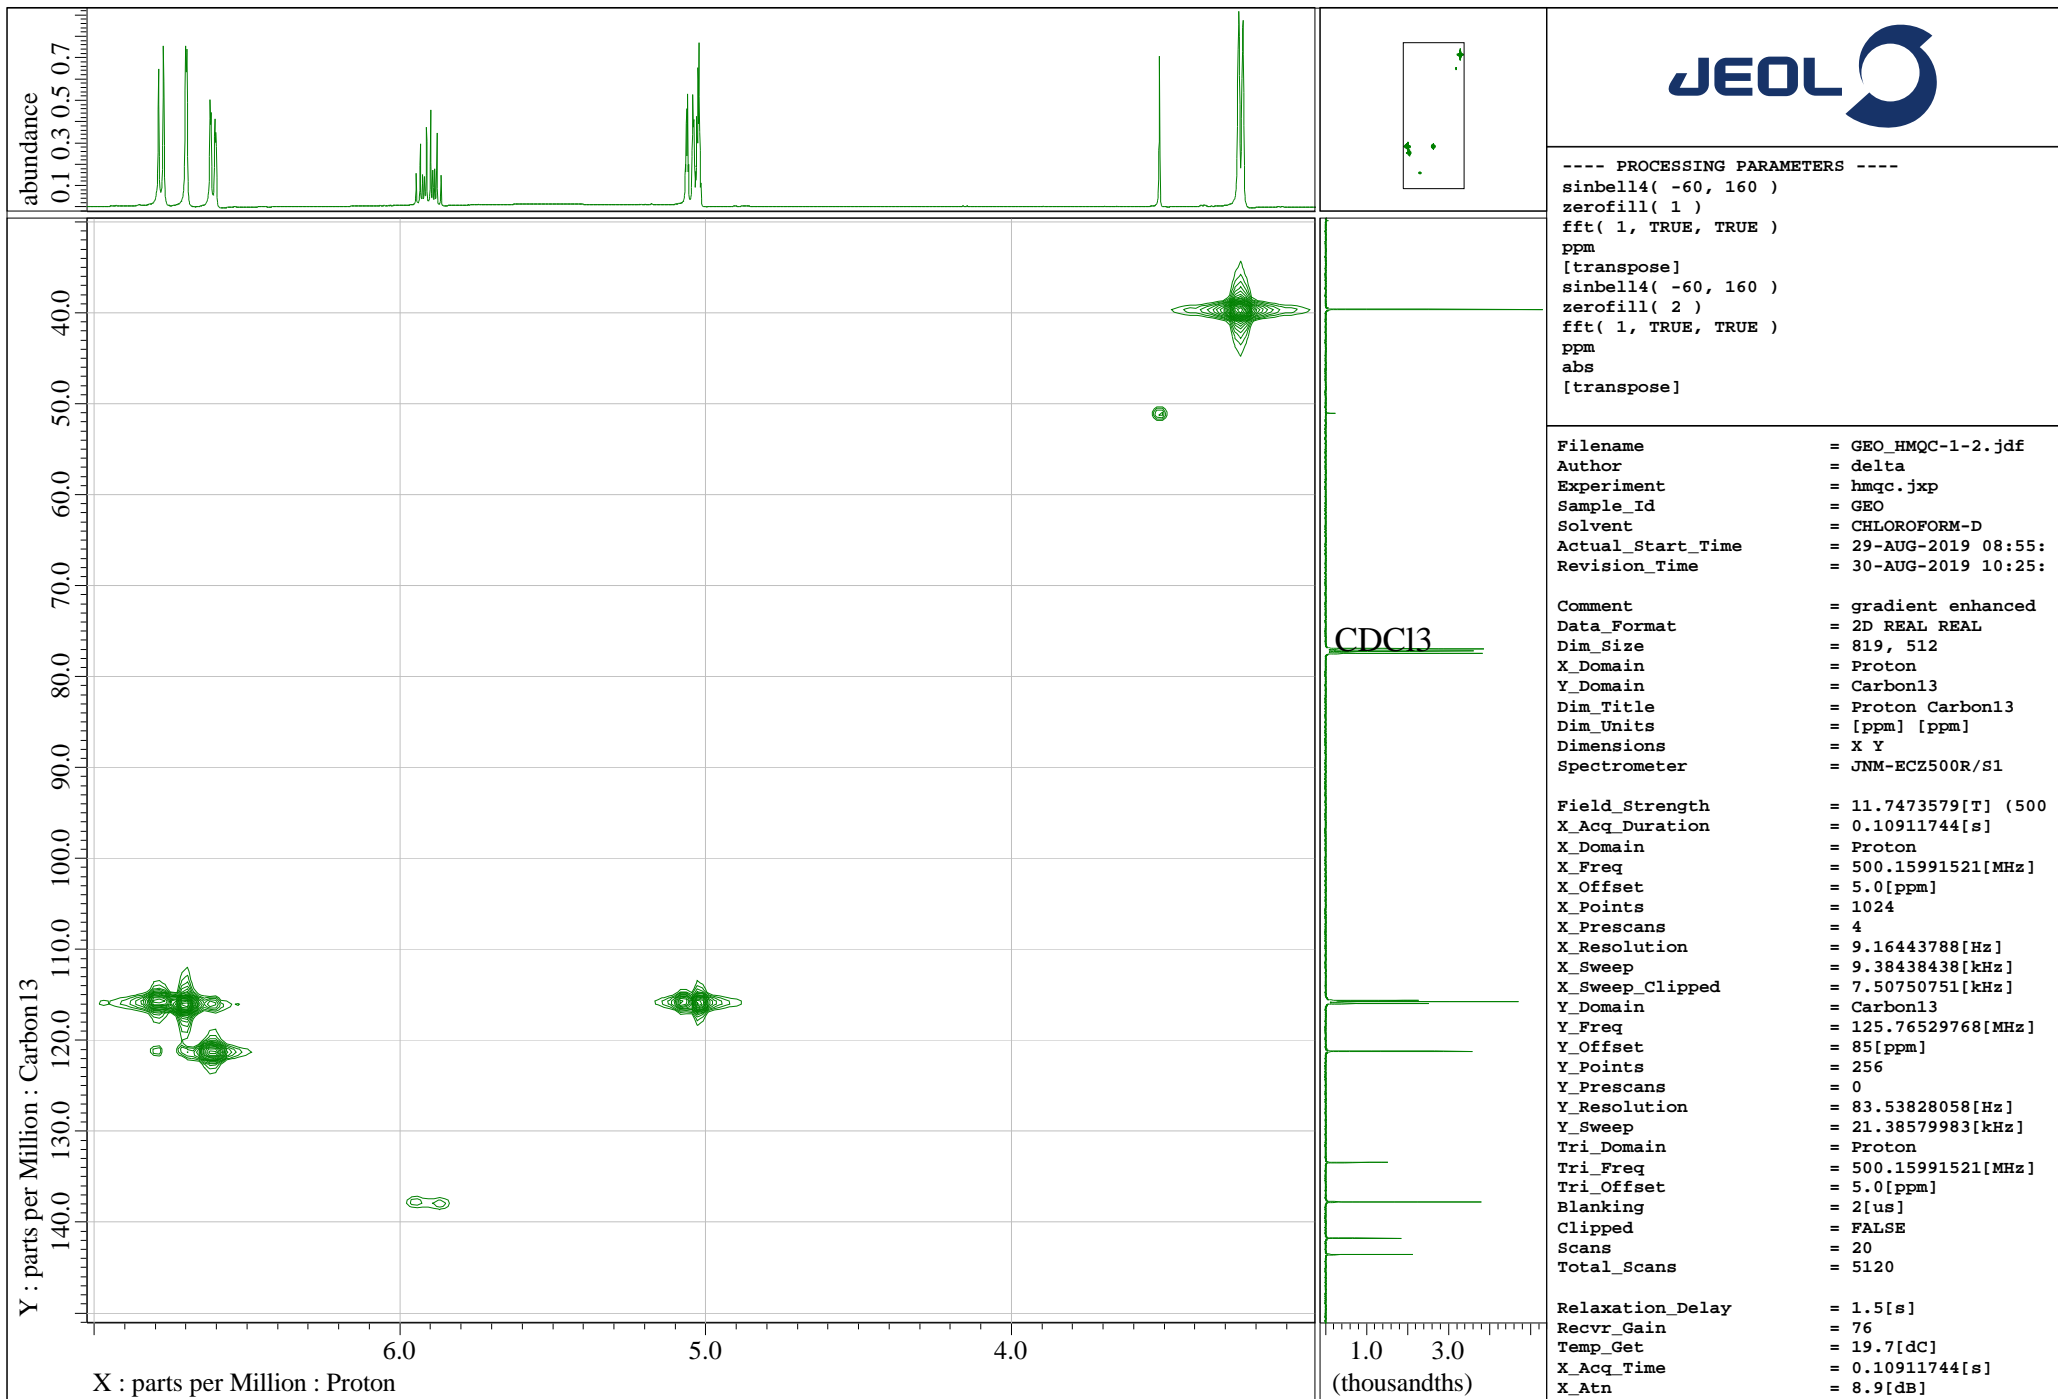

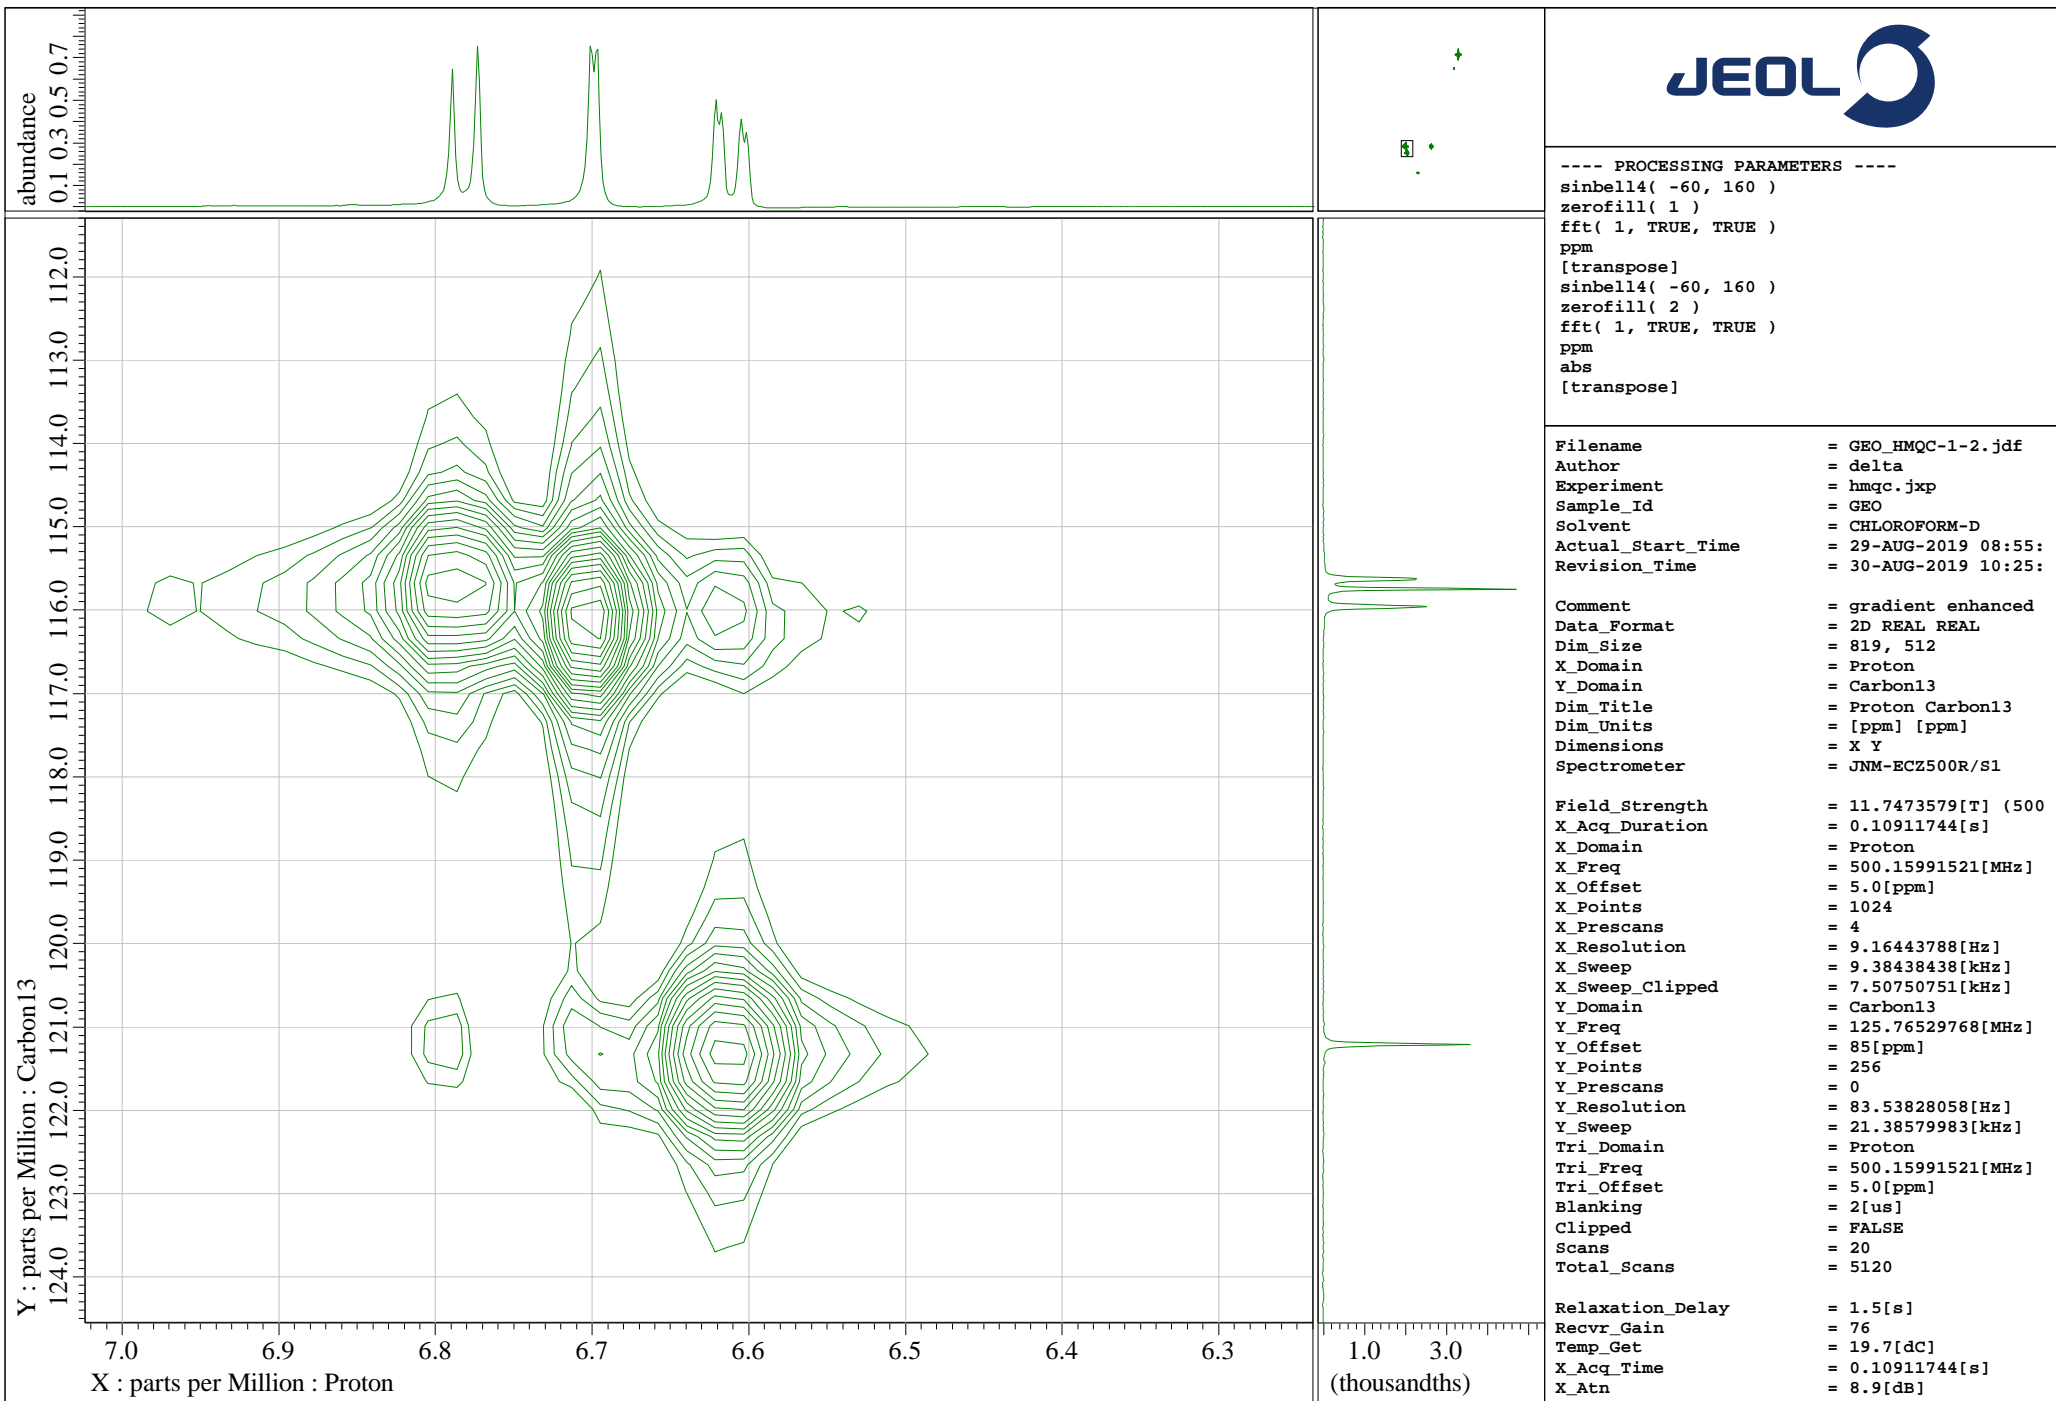

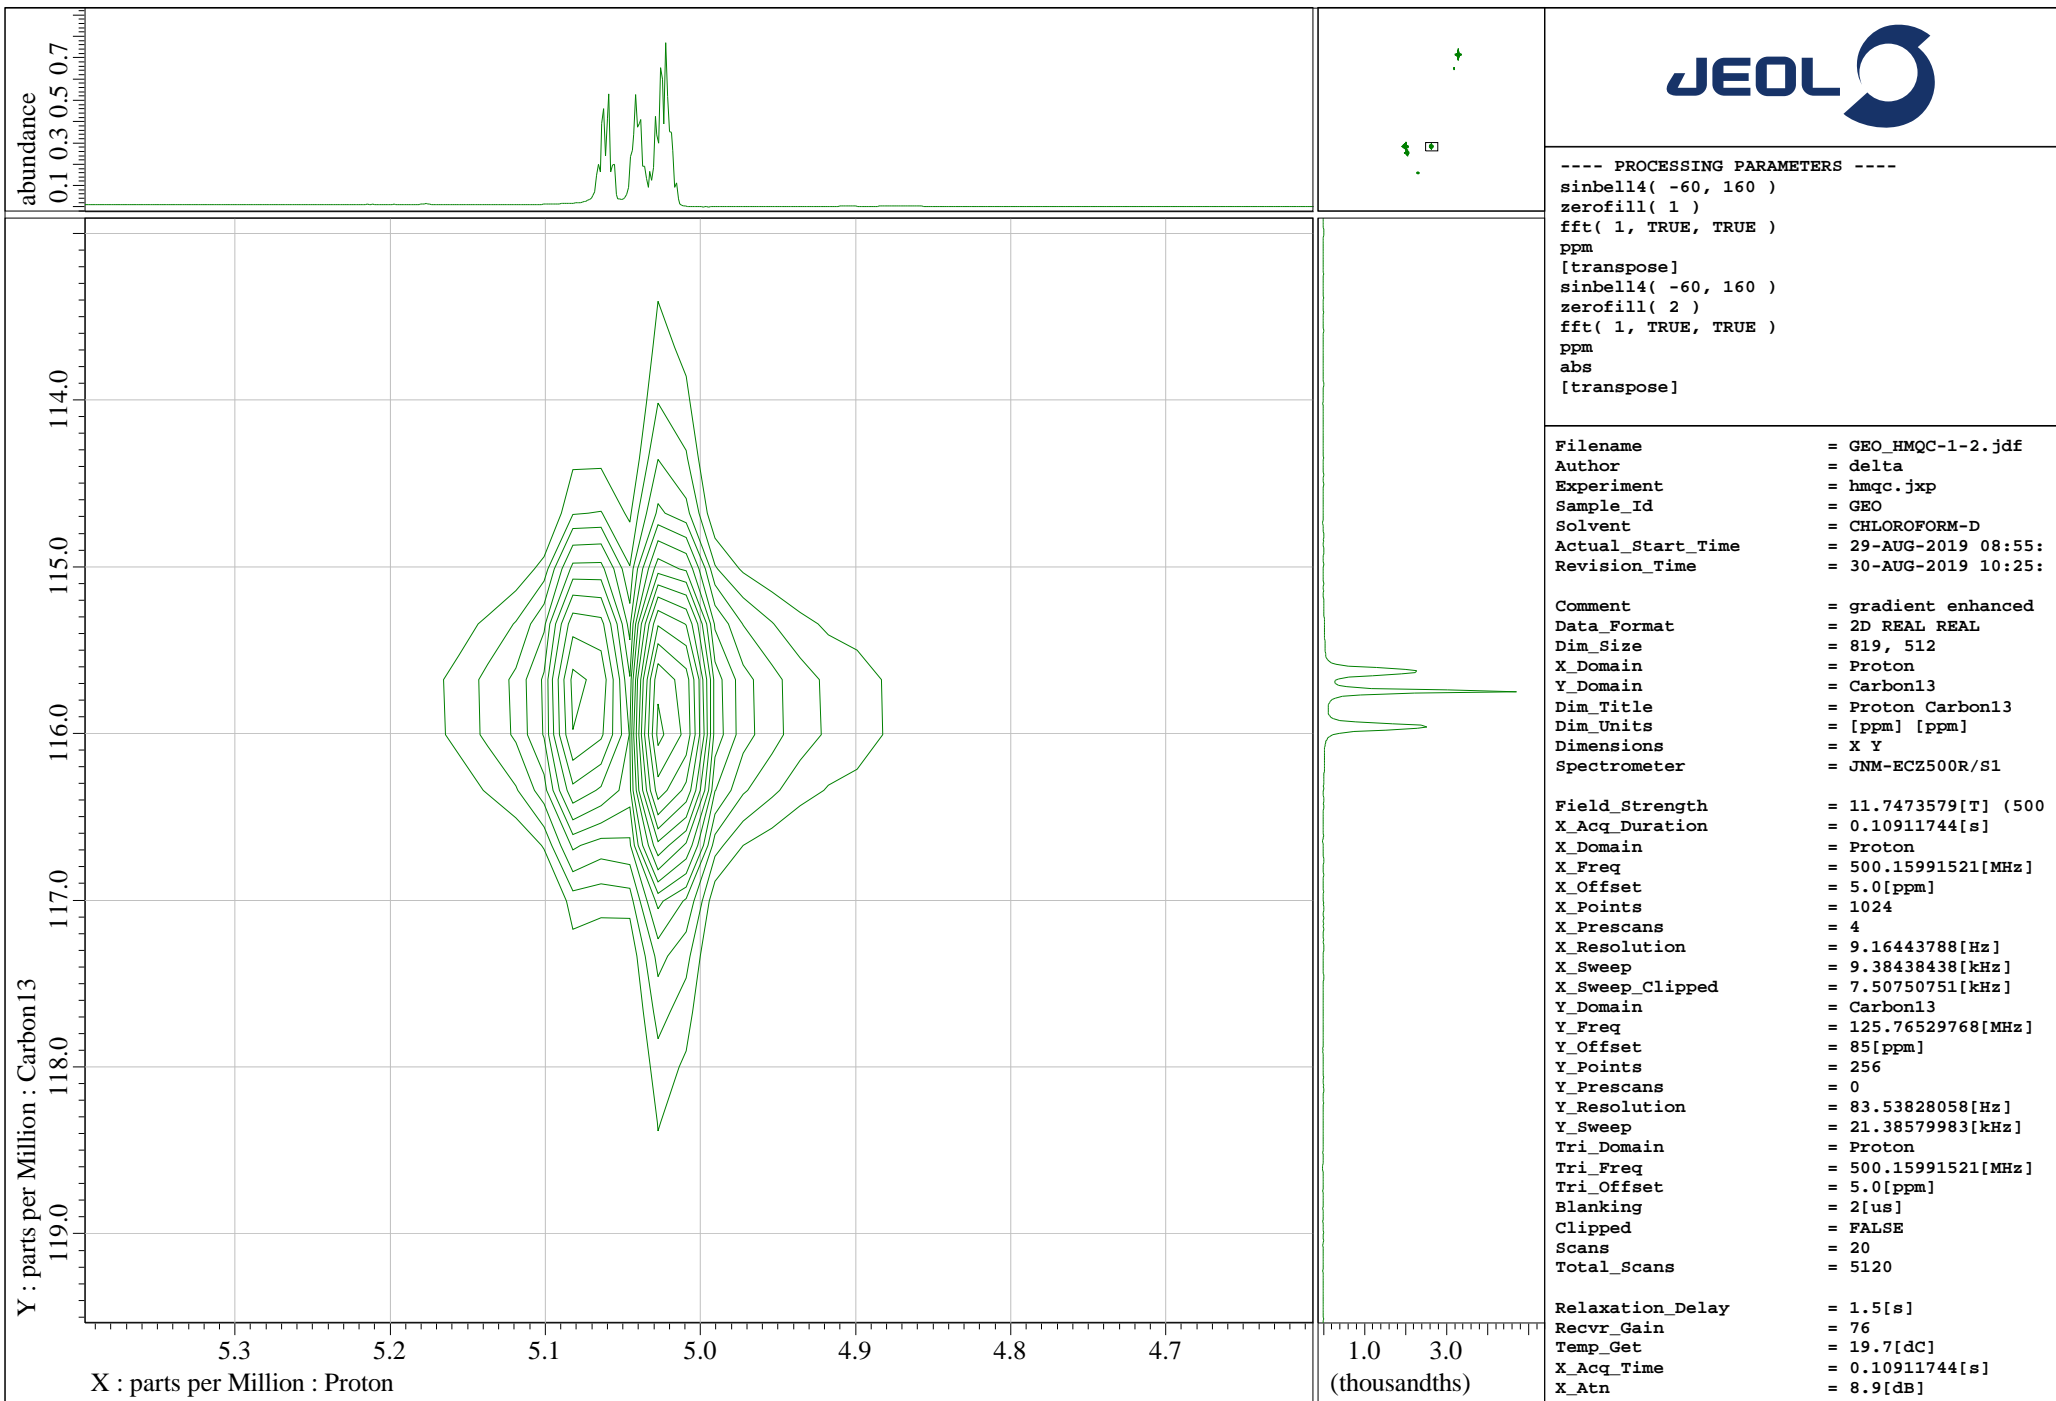

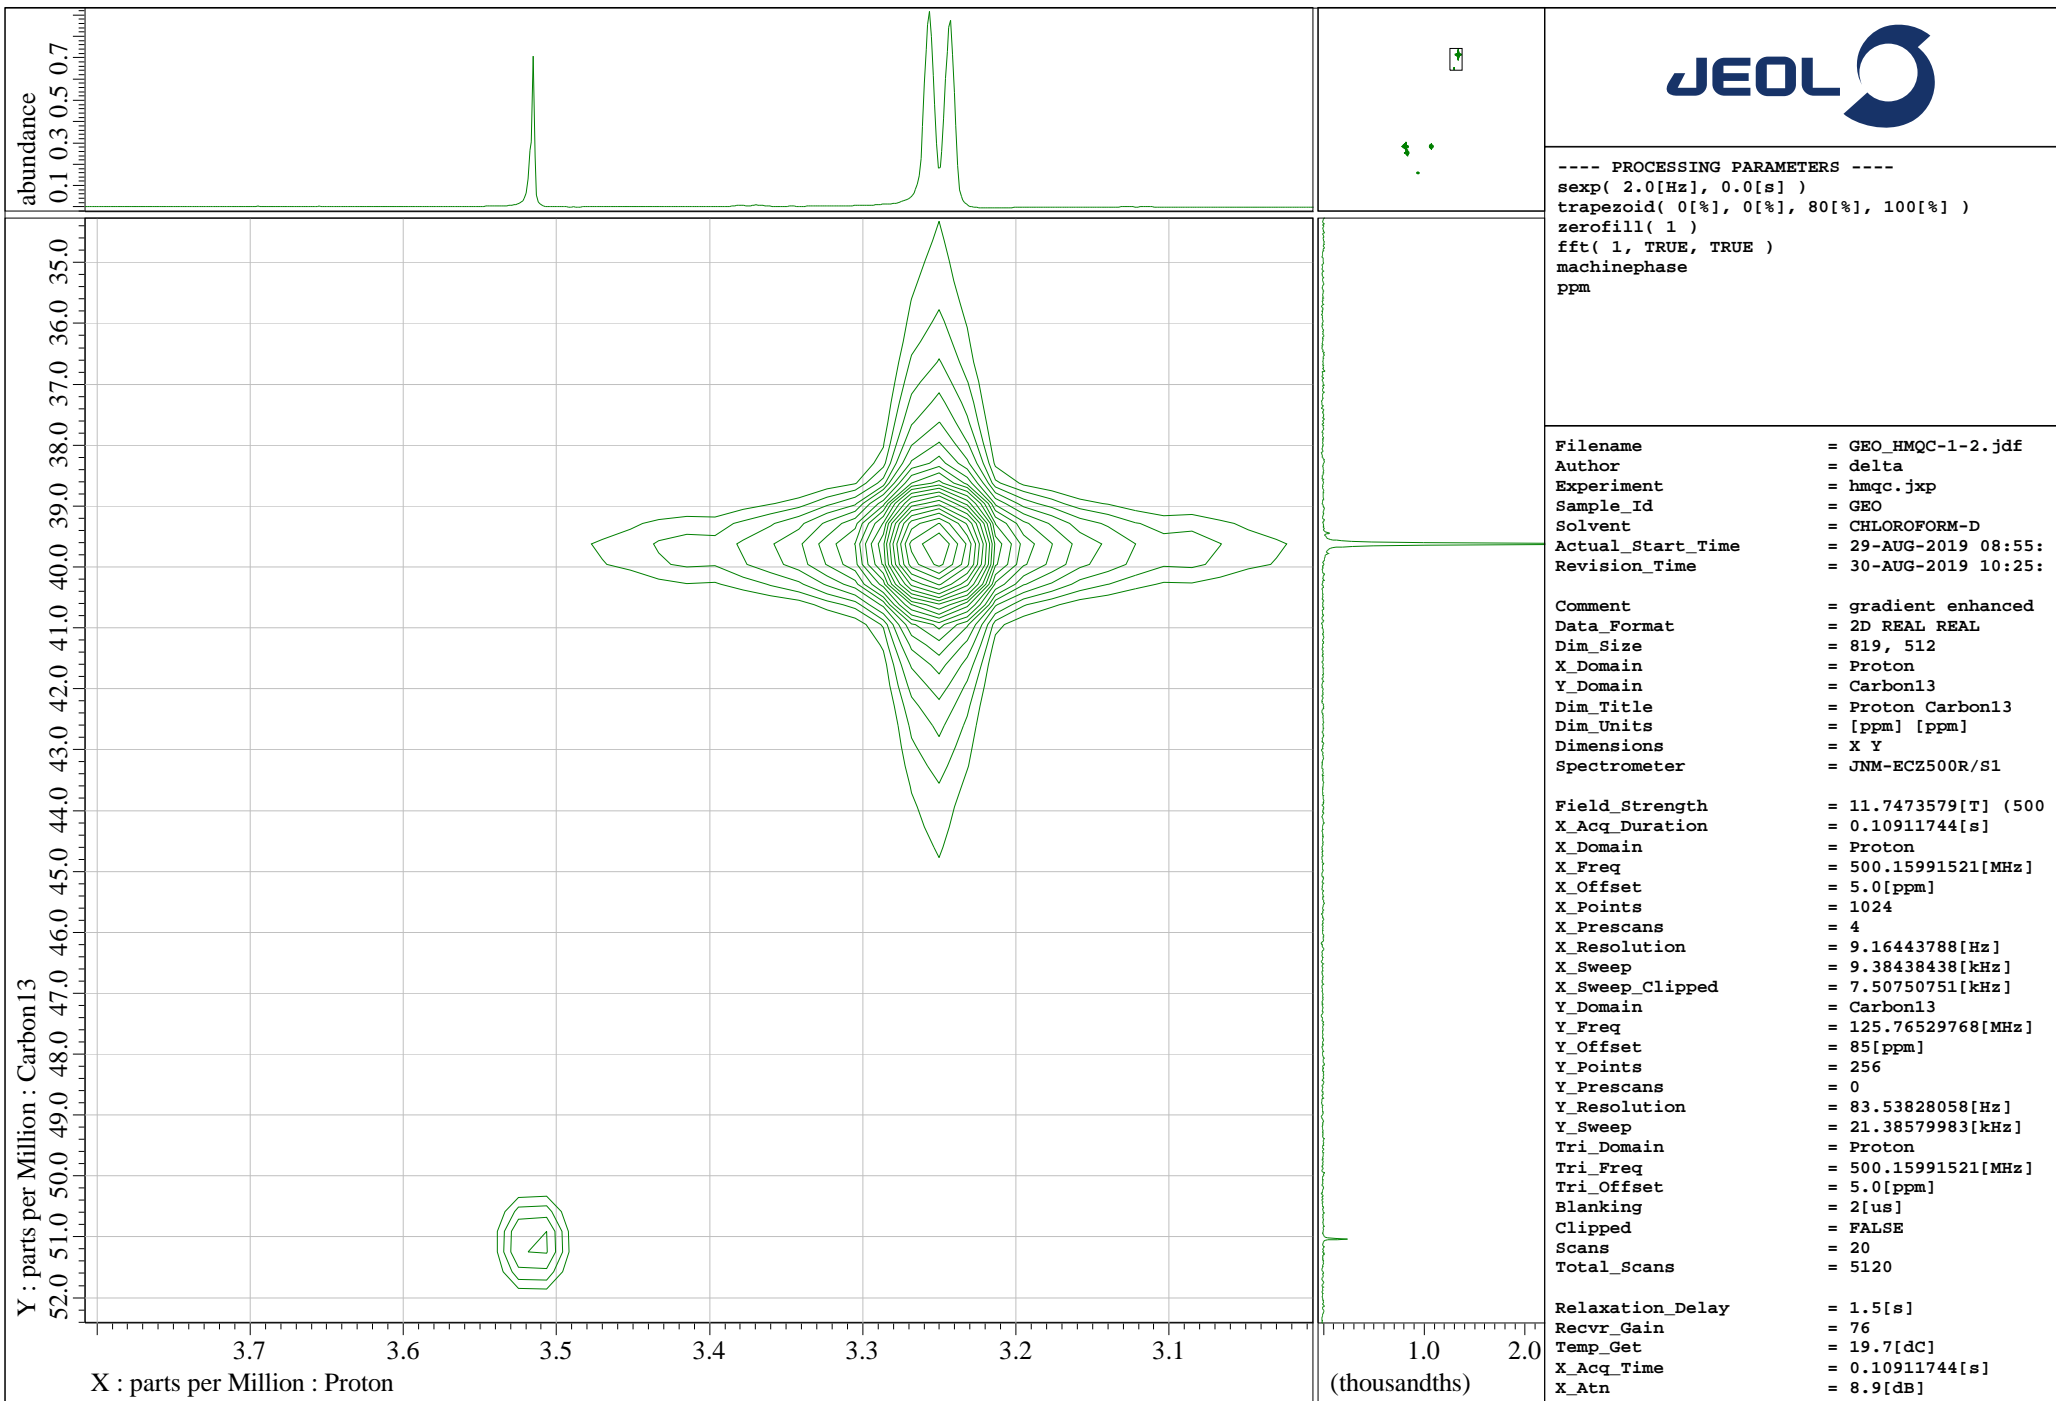

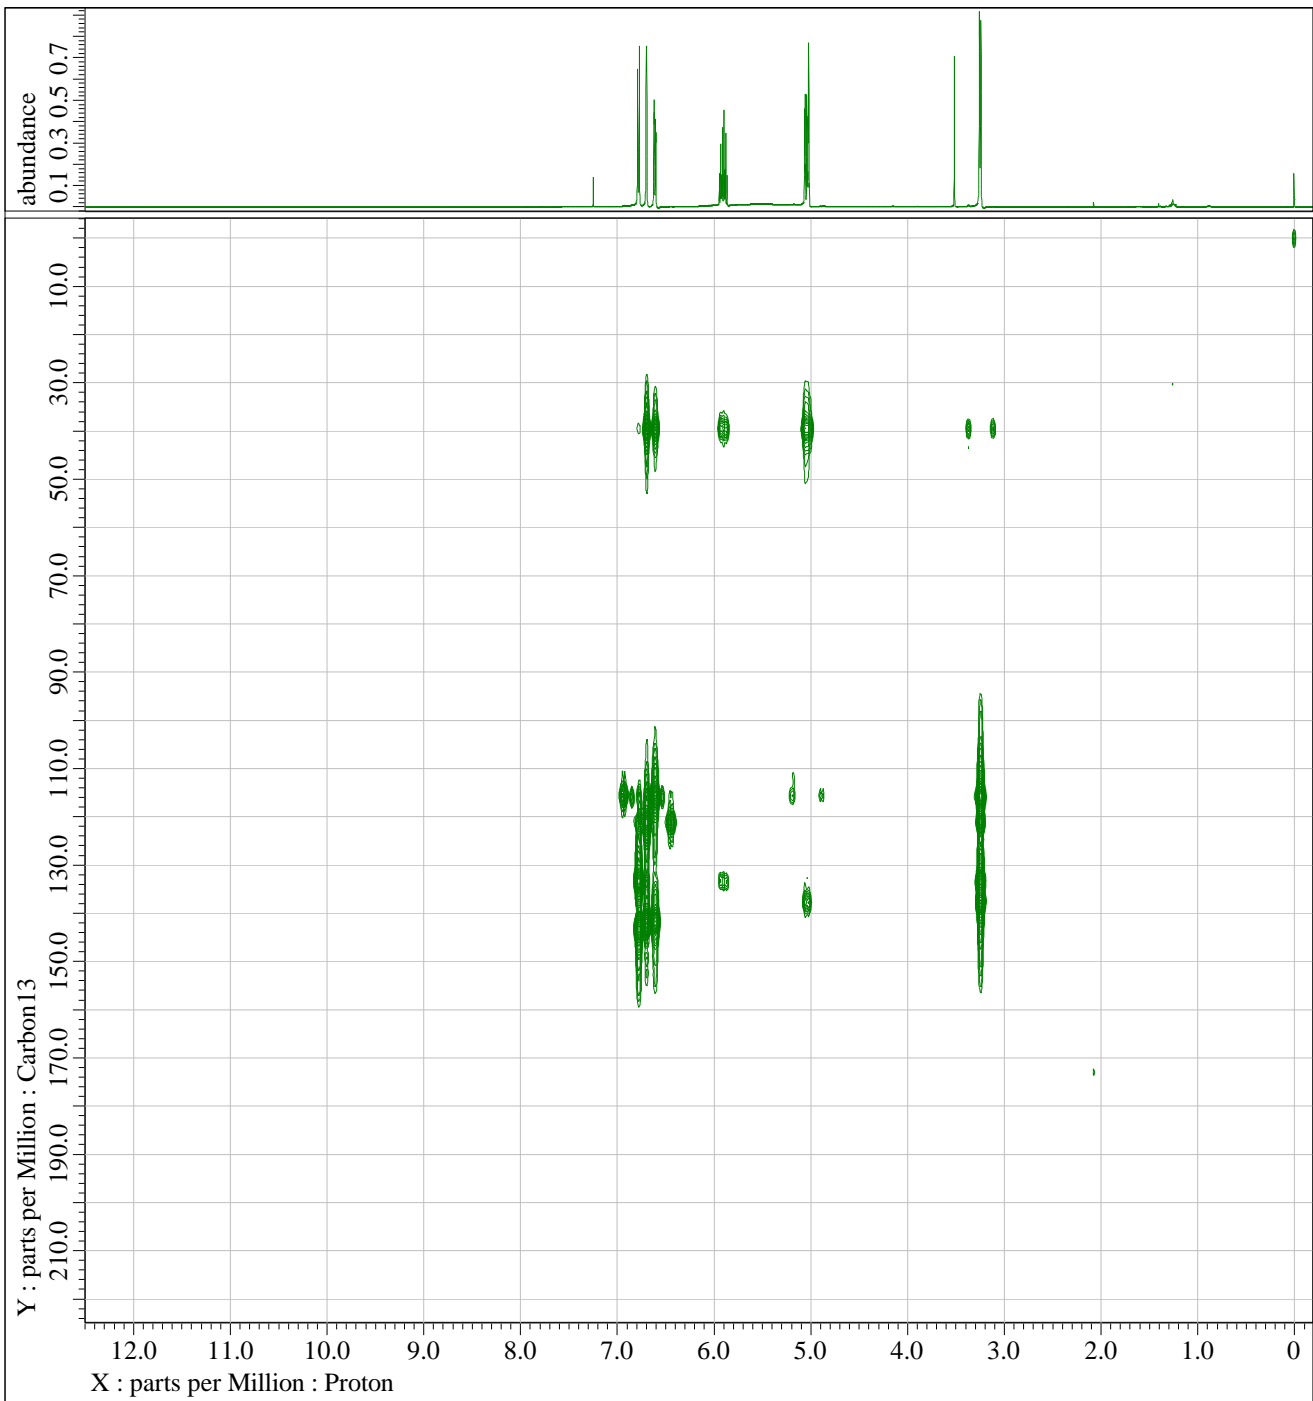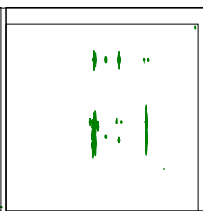

---- PROCESSING PARAMETERS ----  
gauss( 5.0[Hz], 0.0[s] )  
sinbell\_auto  
zerofill( 1 )  
fft( 1, TRUE, TRUE )  
ppm  
[transpose]  
sinbell4( -60, 160 )  
trapezoid( 0[%], 5[%], 80[%], 100[%] )  
zerofill( 2 )  
fft( 1, TRUE, TRUE )  
ppm  
abs

TMS

CDC13

|                   |                         |
|-------------------|-------------------------|
| Filename          | = GEO_HMBC-1-2.jdf      |
| Author            | = delta                 |
| Experiment        | = hmbc.jxp              |
| Sample_Id         | = GEO                   |
| Solvent           | = CHLOROFORM-D          |
| Actual_Start_Time | = 29-AUG-2019 11:16:31  |
| Revision_Time     | = 30-AUG-2019 10:17:55  |
| Comment           | = gradient enhanced HMB |
| Data_Format       | = 2D REAL REAL          |
| Dim_Size          | = 1638, 384             |
| X_Domain          | = Proton                |
| Y_Domain          | = Carbon13              |
| Dim_Title         | = Proton Carbon13       |
| Dim_Units         | = [ppm] [ppm]           |
| Dimensions        | = X Y                   |
| Spectrometer      | = JNM-ECZ500R/S1        |
| Field_Strength    | = 11.7473579[T] (500[MH |
| X_Acq_Duration    | = 0.21823488[s]         |
| X_Domain          | = Proton                |
| X_Freq            | = 500.15991521[MHz]     |
| X_Offset          | = 5.0[ppm]              |
| X_Points          | = 2048                  |
| X_Prescans        | = 4                     |
| X_Resolution      | = 4.58221894[Hz]        |
| X_Sweep           | = 9.38438438[kHz]       |
| X_Sweep_Clippped  | = 7.50750751[kHz]       |
| Y_Domain          | = Carbon13              |
| Y_Freq            | = 125.76529768[MHz]     |
| Y_Offset          | = 100[ppm]              |
| Y_Points          | = 192                   |
| Y_Prescans        | = 0                     |
| Y_Resolution      | = 122.83805031[Hz]      |
| Y_Sweep           | = 31.44654088[kHz]      |
| Tri_Domain        | = Proton                |
| Tri_Freq          | = 500.15991521[MHz]     |
| Tri_Offset        | = 5.0[ppm]              |
| Blanking          | = 2[us]                 |
| Clipped           | = FALSE                 |
| Scans             | = 30                    |
| Total_Scans       | = 5760                  |
| Relaxation_Delay  | = 1.5[s]                |
| Recvr_Gain        | = 76                    |
| Temp_Get          | = 19.9[dC]              |
| X_Acq_Time        | = 0.21823488[s]         |
| X_Atn             | = 8.9[dB]               |

(thousandths)



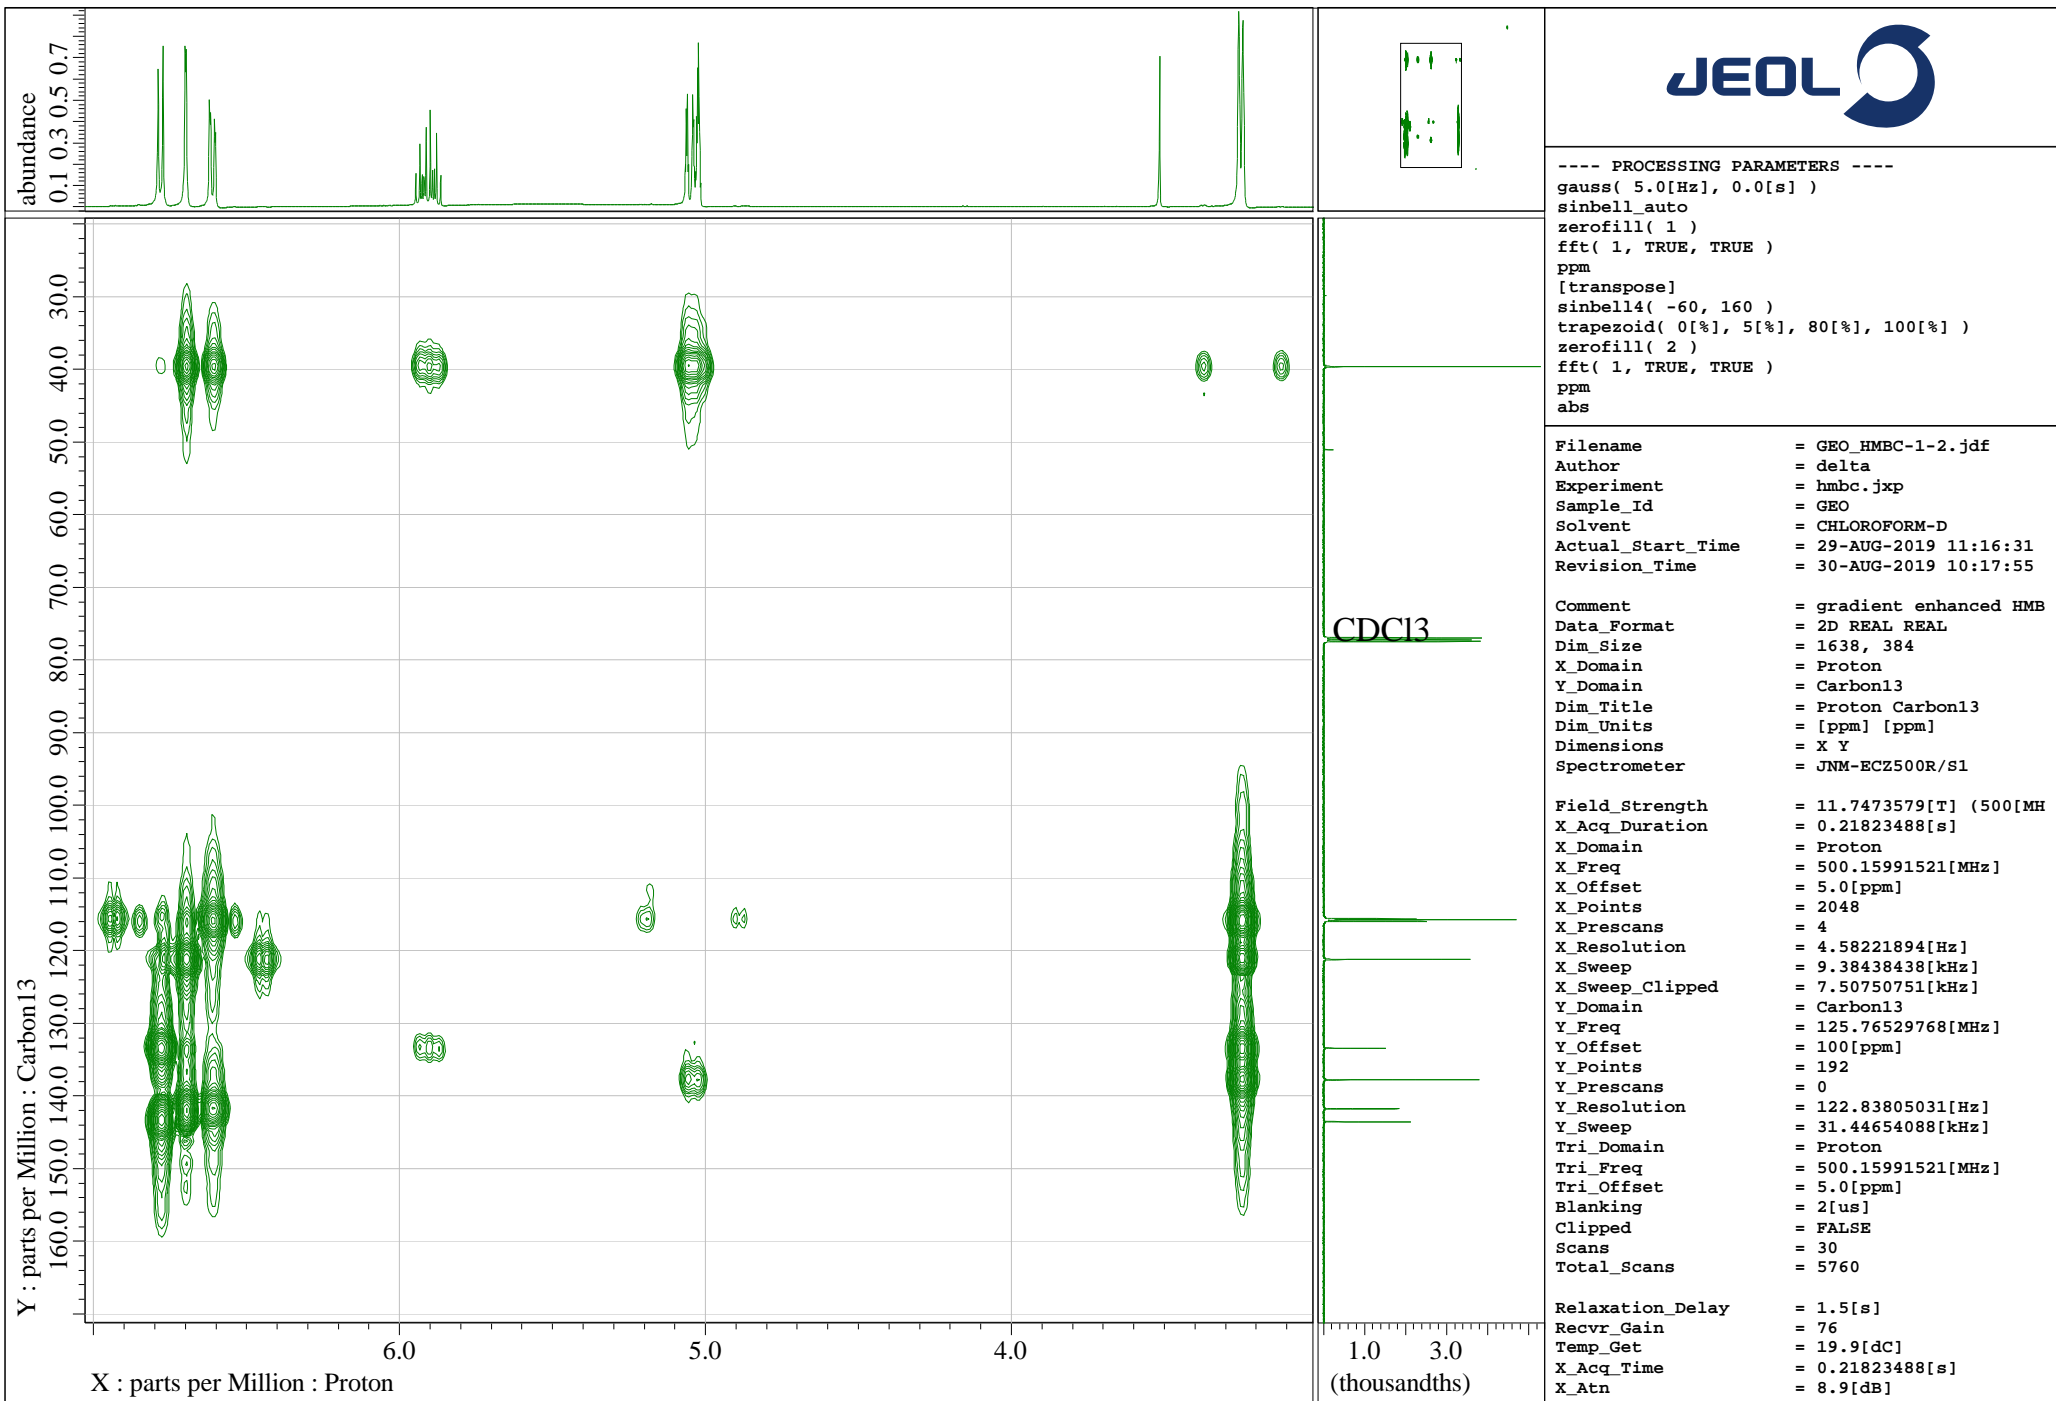

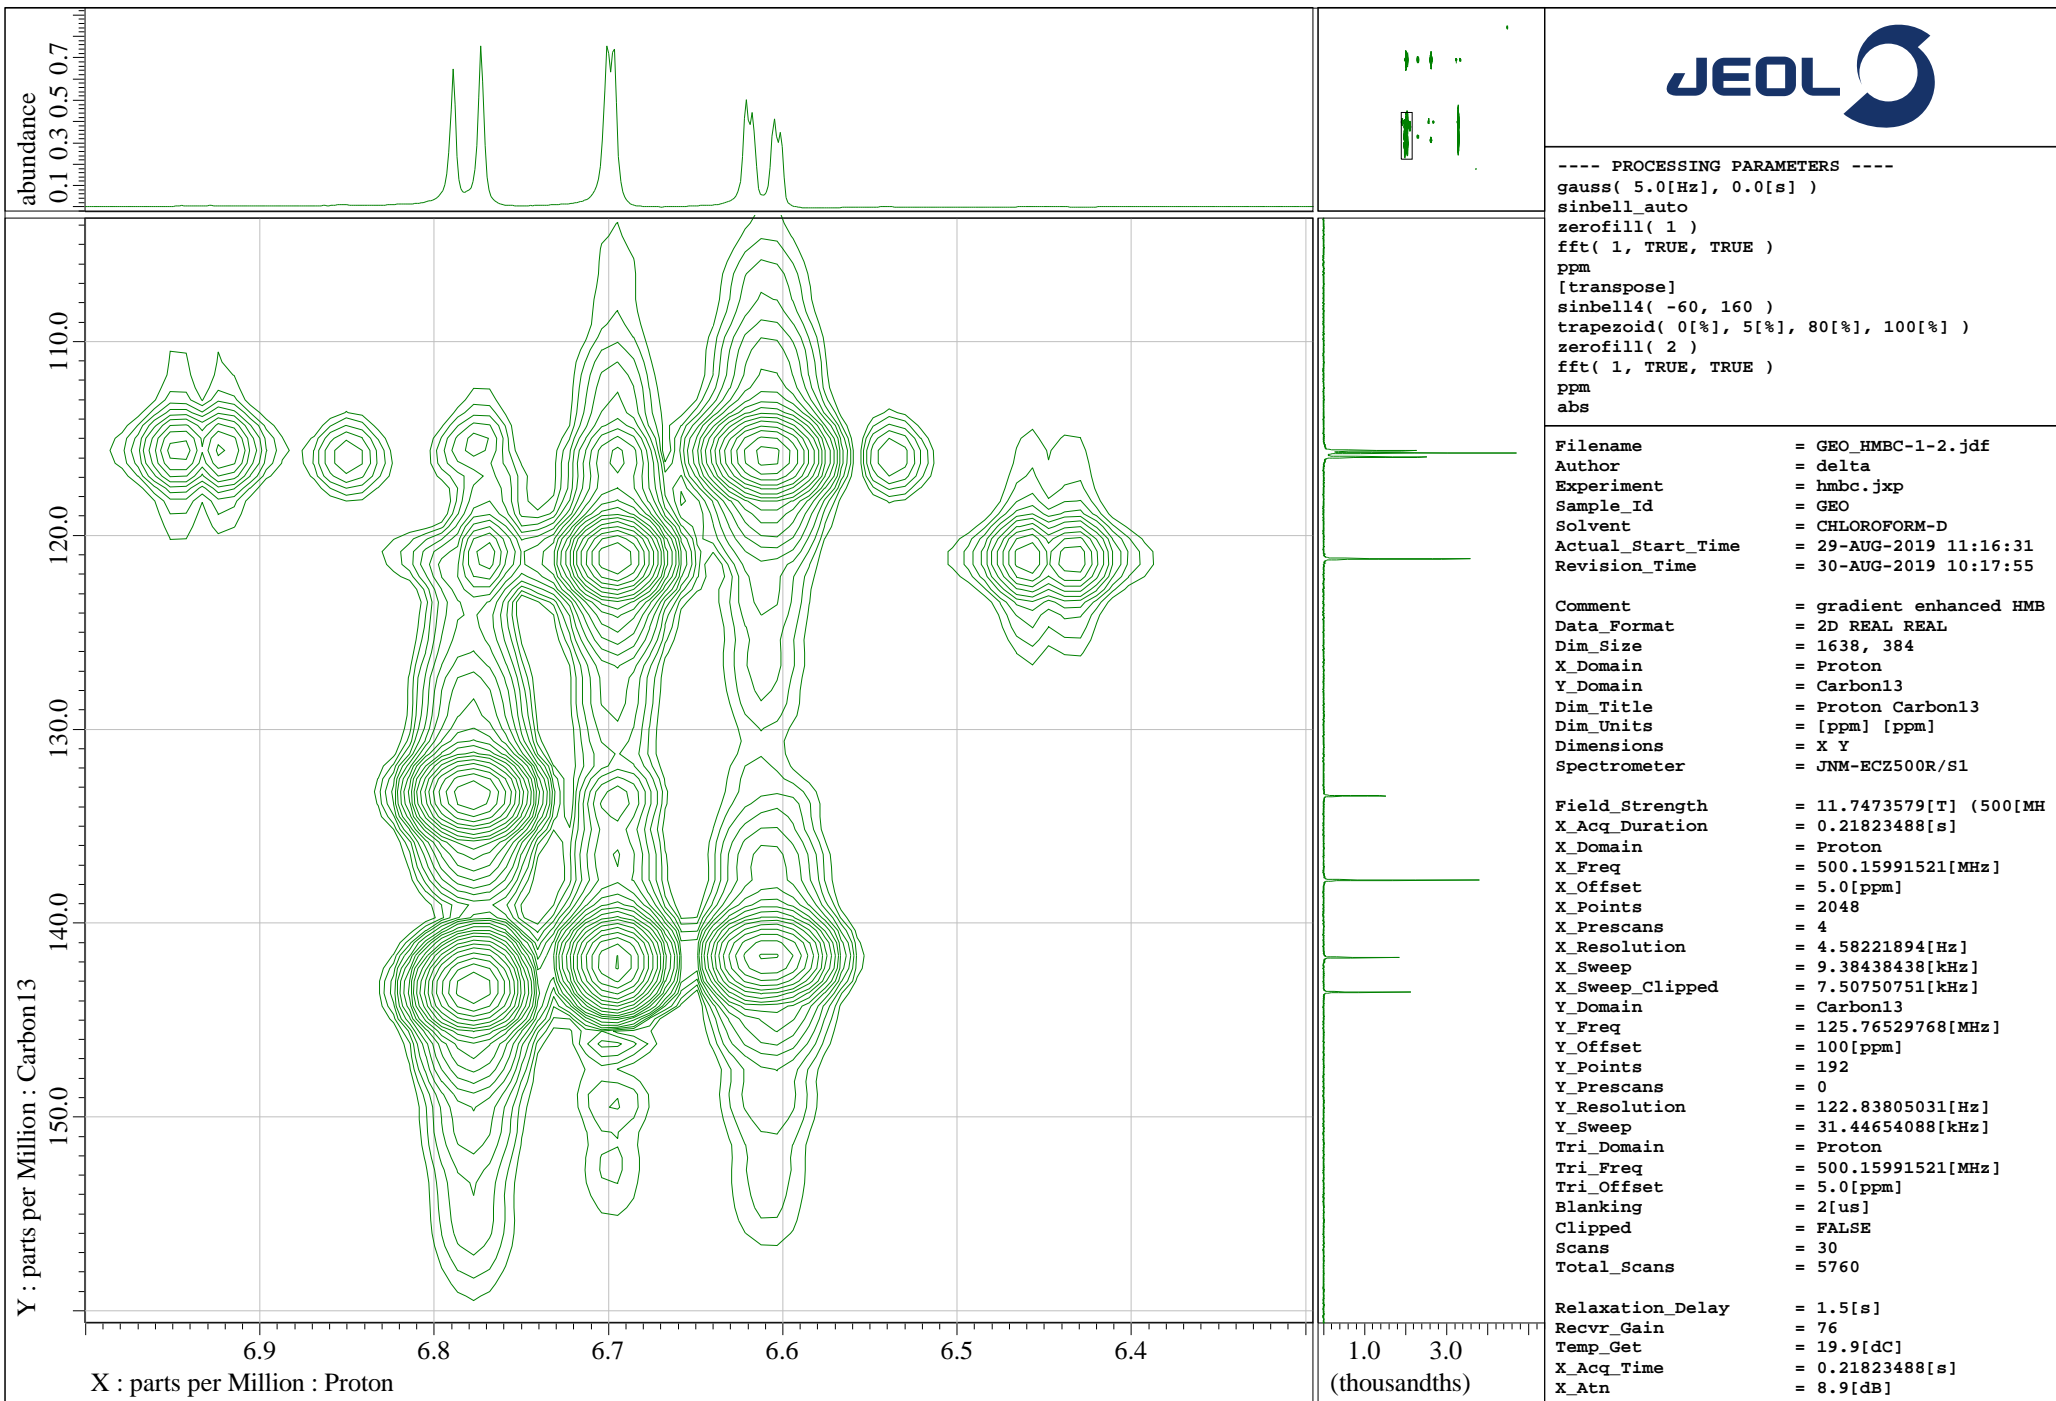

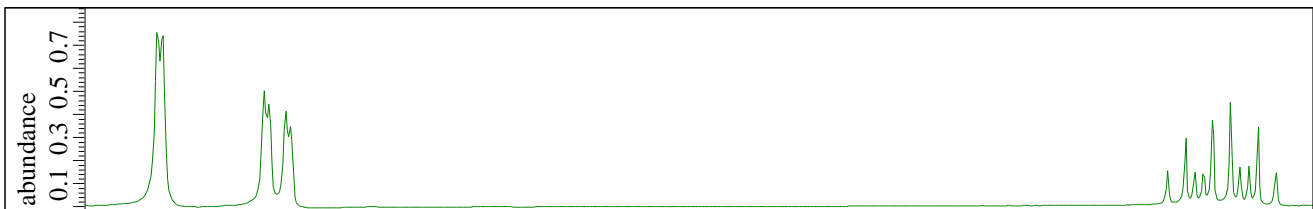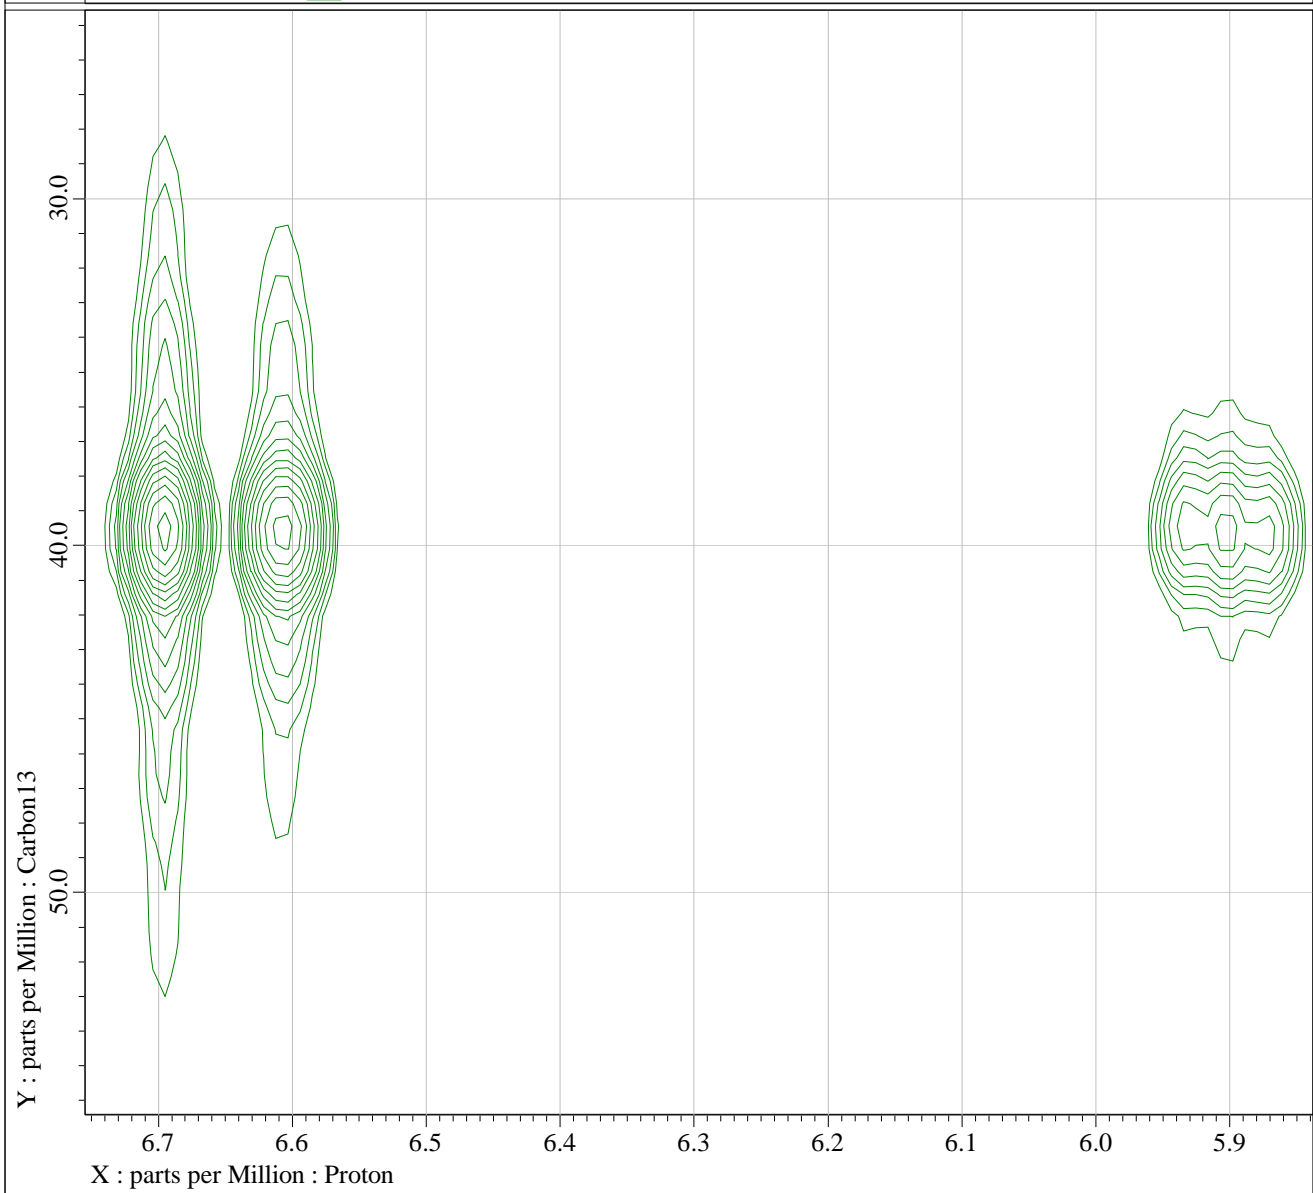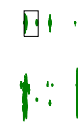

---- PROCESSING PARAMETERS ----  
sexp( 2.0[Hz], 0.0[s] )  
trapezoid( 0[%], 0[%], 80[%], 100[%] )  
zerofill( 1 )  
fft( 1, TRUE, TRUE )  
machinephase  
ppm

Filename = GEO\_HMBC-1-2.jdf  
Author = delta  
Experiment = hmbc.jxp  
Sample\_Id = GEO  
Solvent = CHLOROFORM-D  
Actual\_Start\_Time = 29-AUG-2019 11:16:31  
Revision\_Time = 30-AUG-2019 10:17:55  
  
Comment = gradient enhanced HMB  
Data\_Format = 2D REAL REAL  
Dim\_Size = 1638, 384  
X\_Domain = Proton  
Y\_Domain = Carbon13  
Dim\_Title = Proton Carbon13  
Dim\_Units = [ppm] [ppm]  
Dimensions = X Y  
Spectrometer = JNM-ECZ500R/S1  
  
Field\_Strength = 11.7473579[T] (500[MH  
X\_Acq\_Duration = 0.21823488[s]  
X\_Domain = Proton  
X\_Freq = 500.15991521[MHz]  
X\_Offset = 5.0[ppm]  
X\_Points = 2048  
X\_Prescans = 4  
X\_Resolution = 4.58221894[Hz]  
X\_Sweep = 9.38438438[kHz]  
X\_Sweep\_Clippped = 7.50750751[kHz]  
Y\_Domain = Carbon13  
Y\_Freq = 125.76529768[MHz]  
Y\_Offset = 100[ppm]  
Y\_Points = 192  
Y\_Prescans = 0  
Y\_Resolution = 122.83805031[Hz]  
Y\_Sweep = 31.44654088[kHz]  
Tri\_Domain = Proton  
Tri\_Freq = 500.15991521[MHz]  
Tri\_Offset = 5.0[ppm]  
Blanking = 2[us]  
Clipped = FALSE  
Scans = 30  
Total\_Scans = 5760  
  
Relaxation\_Delay = 1.5[s]  
Recvr\_Gain = 76  
Temp\_Get = 19.9[dc]  
X\_Acq\_Time = 0.21823488[s]  
X\_Atn = 8.9[dB]

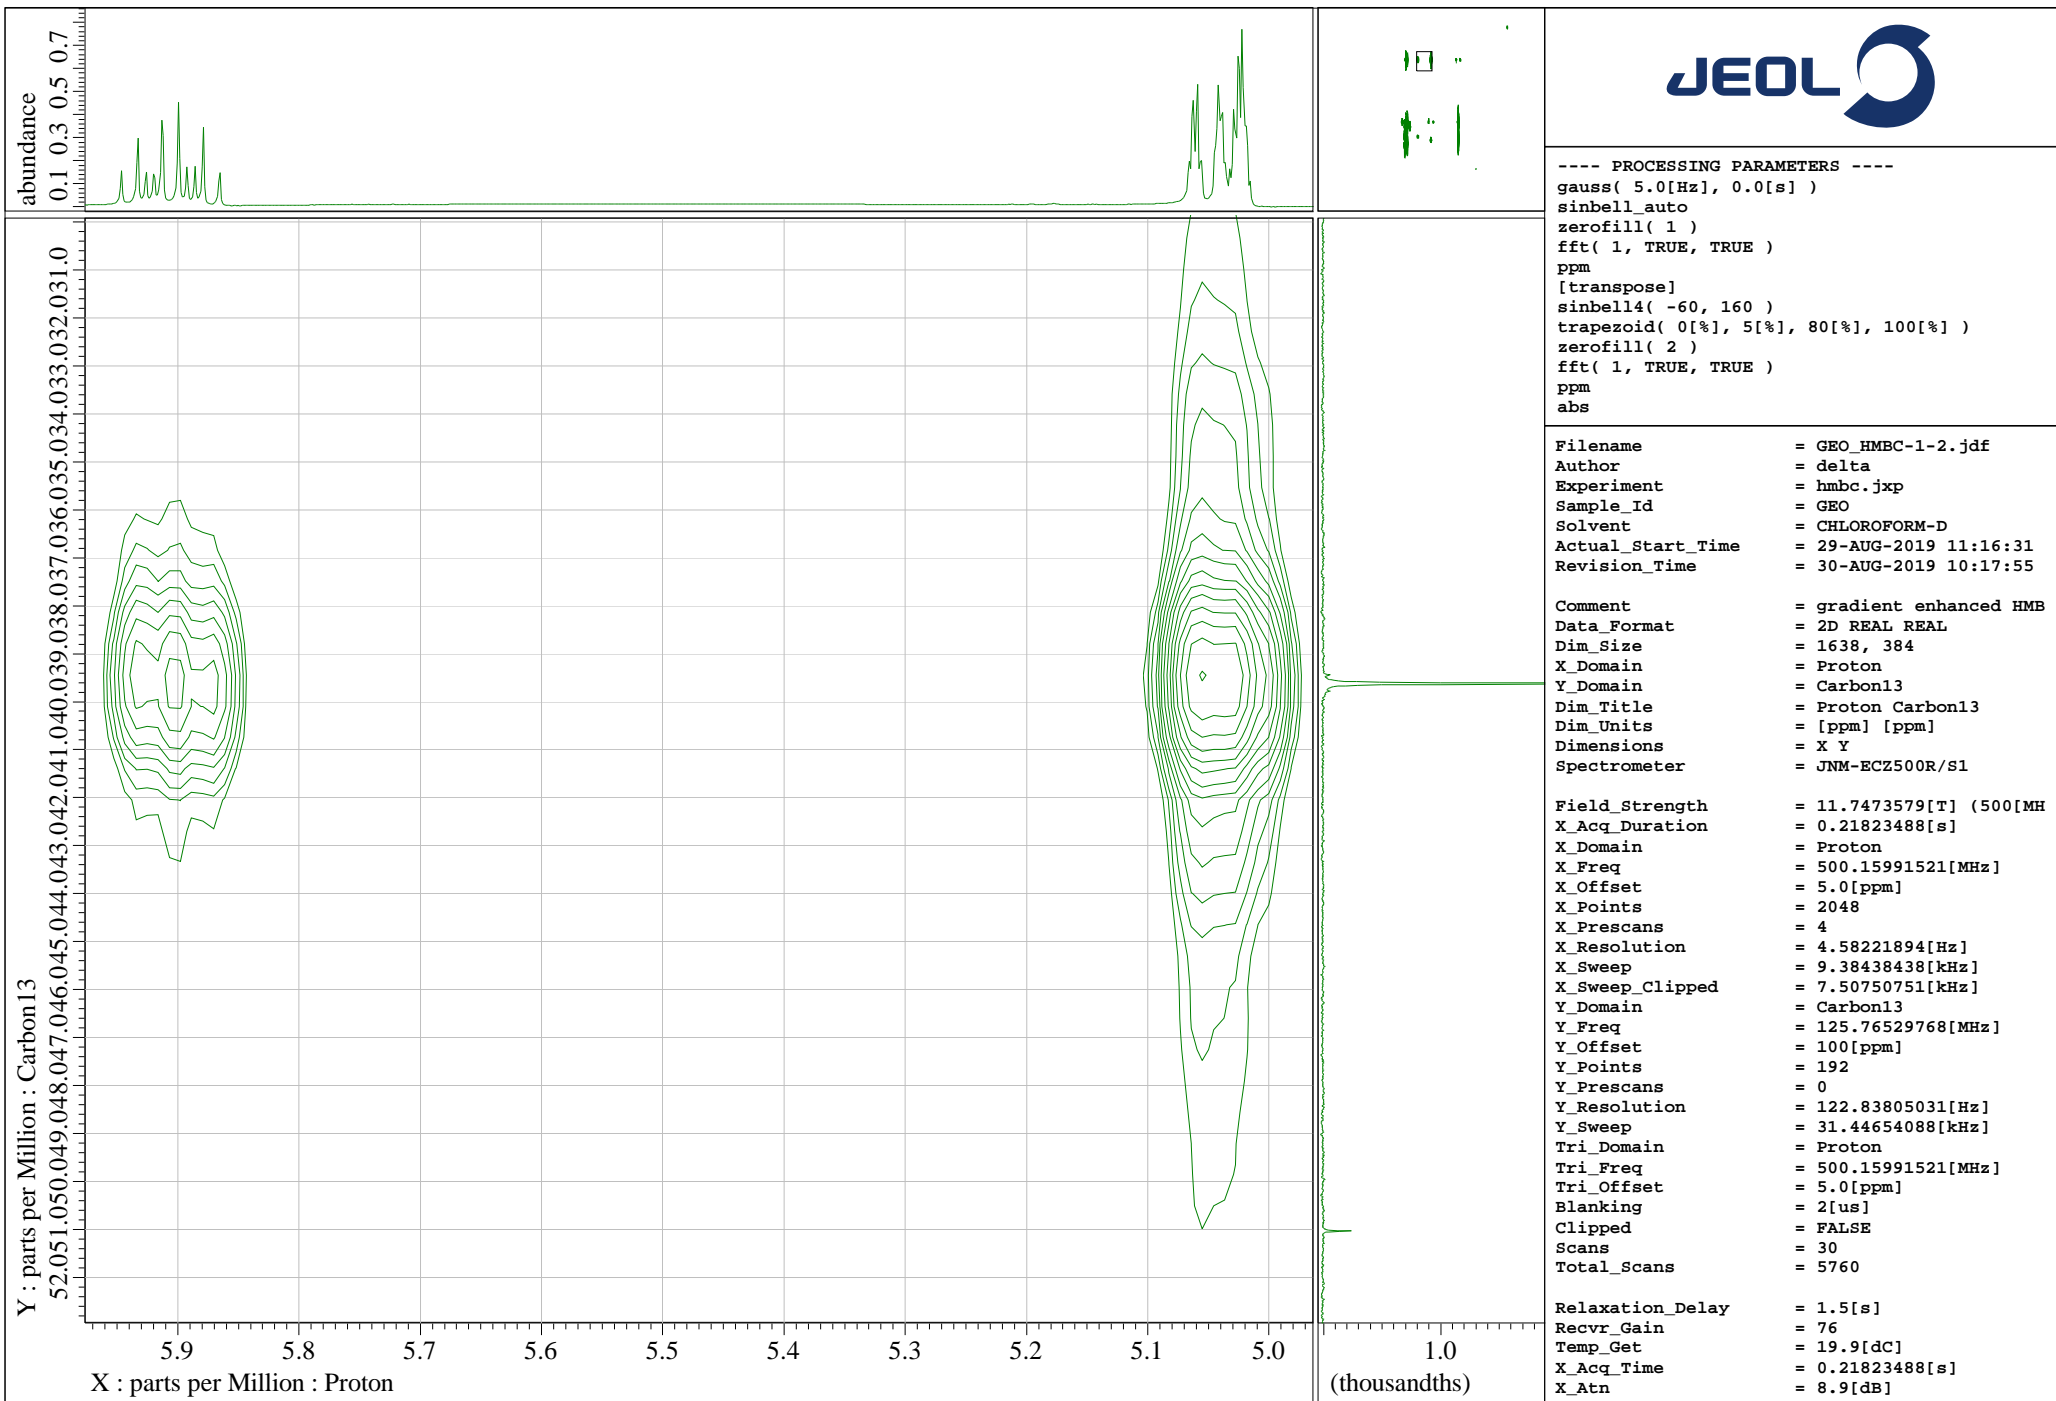

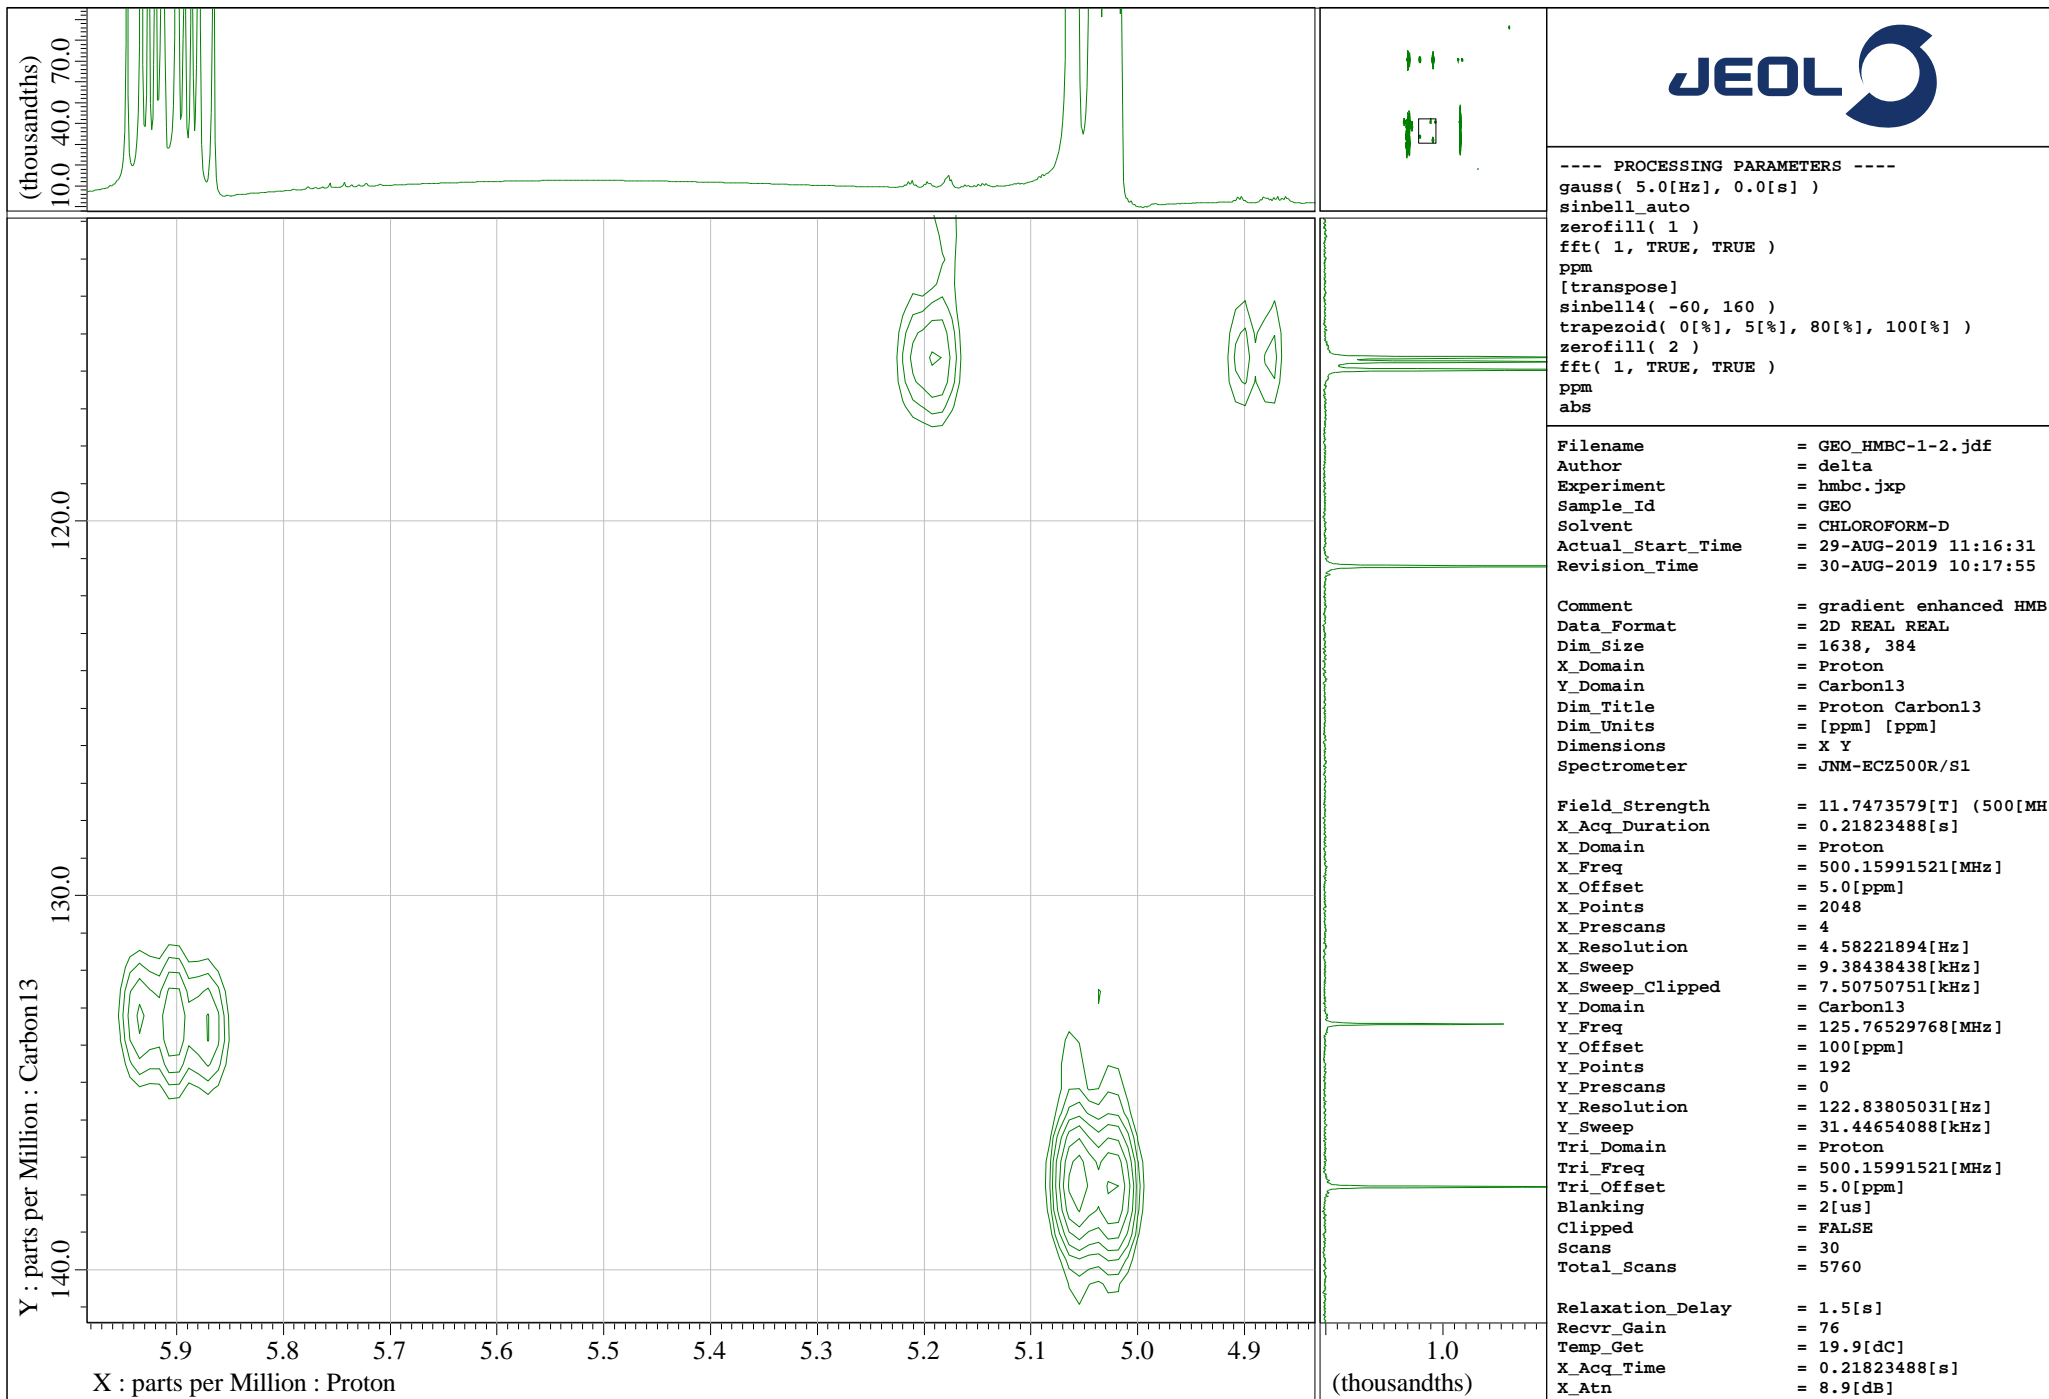

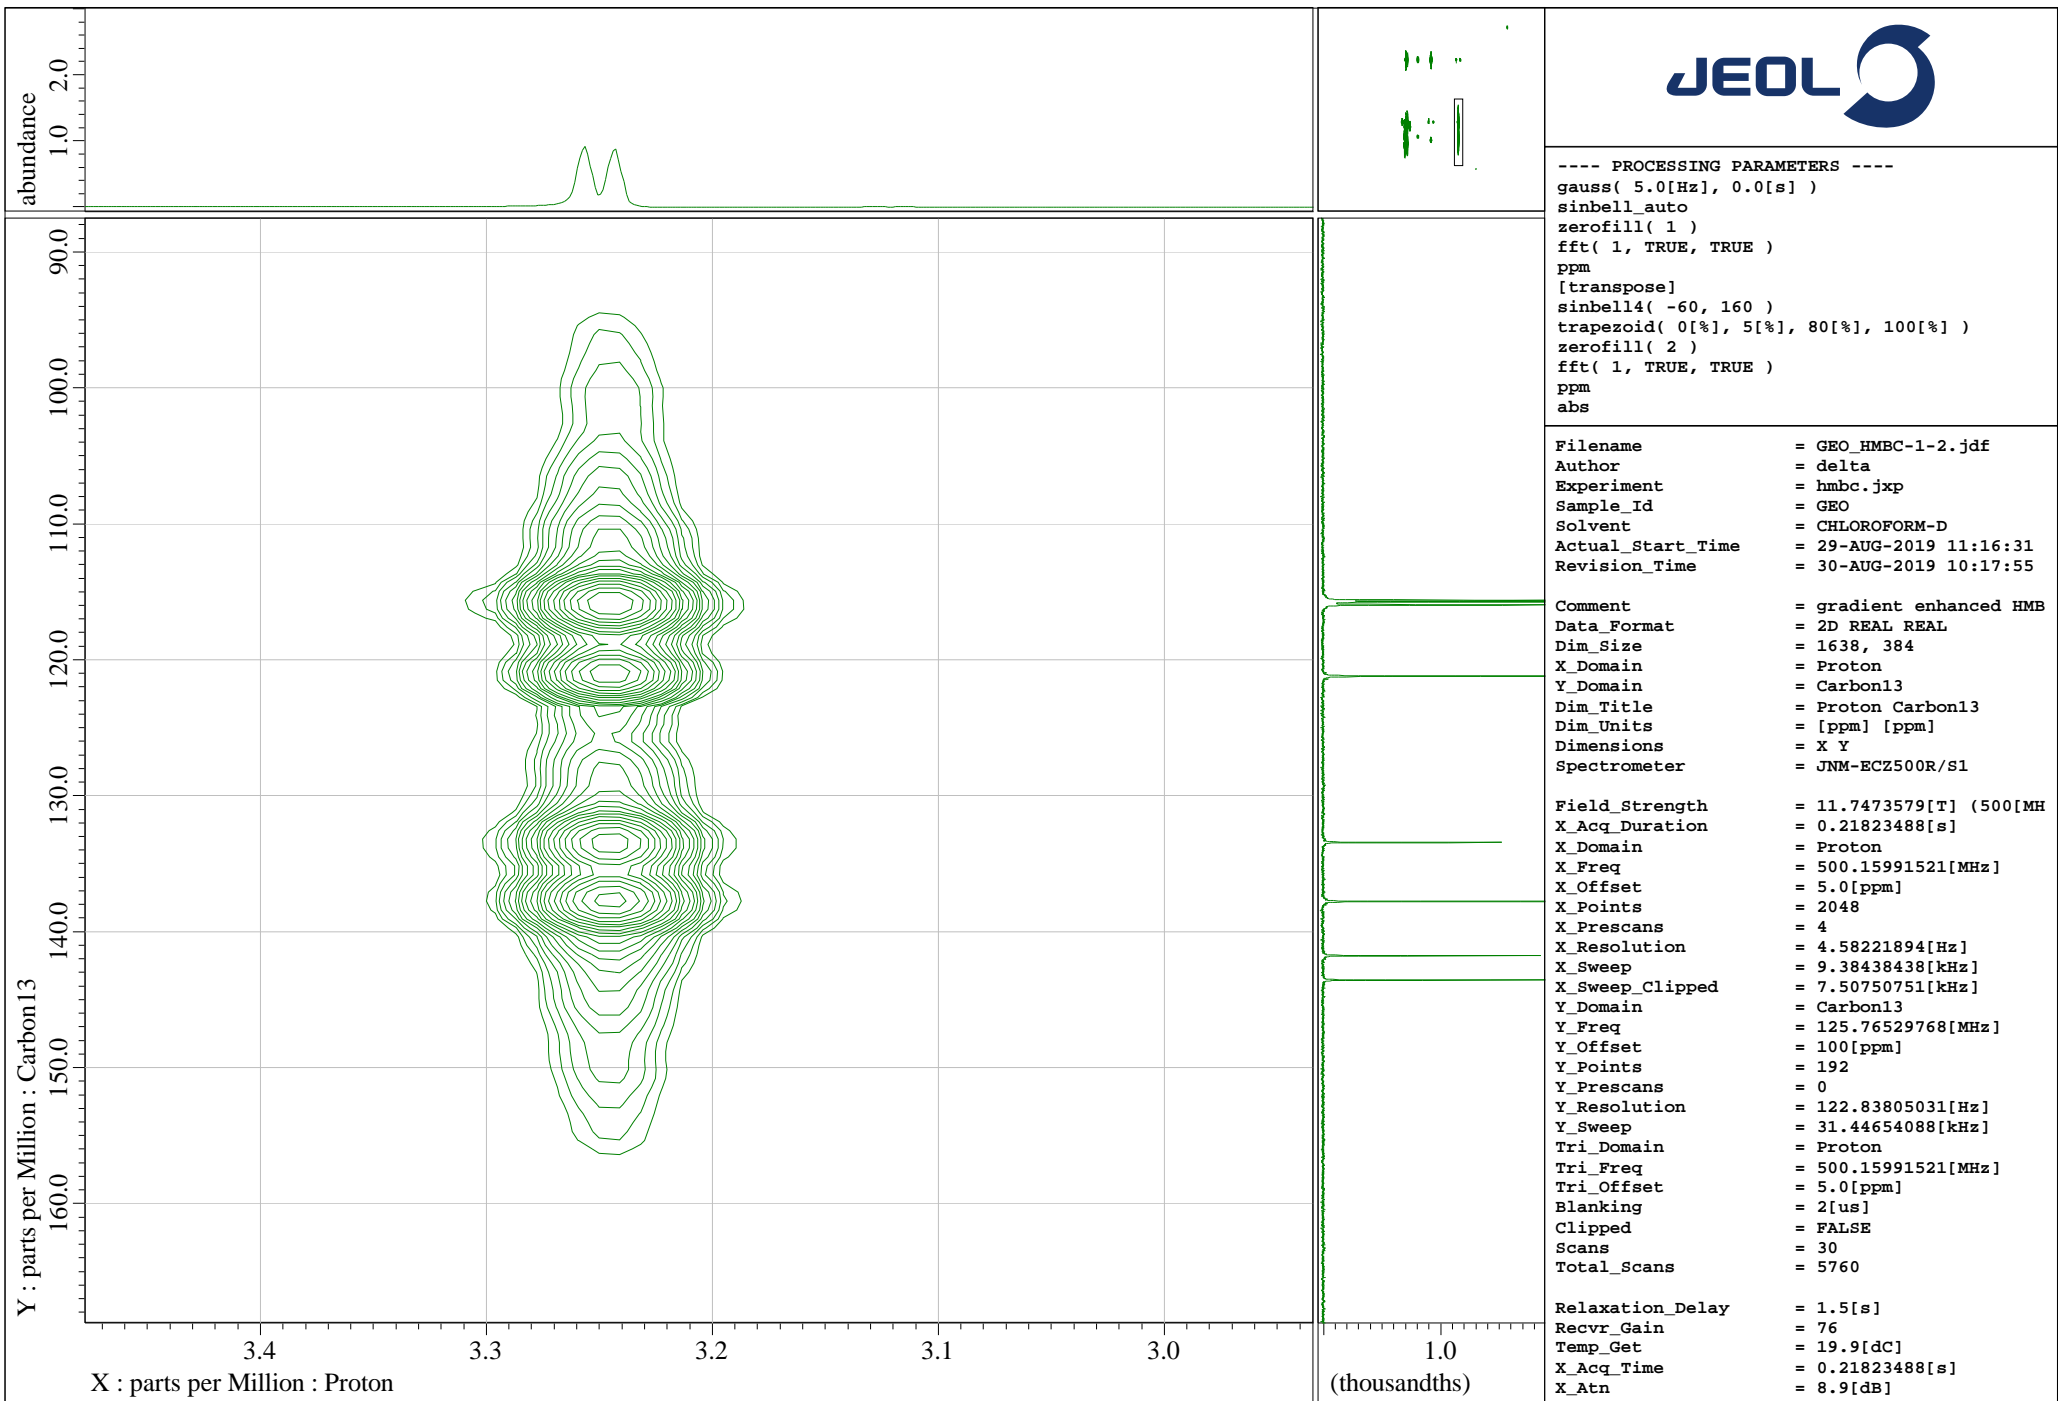

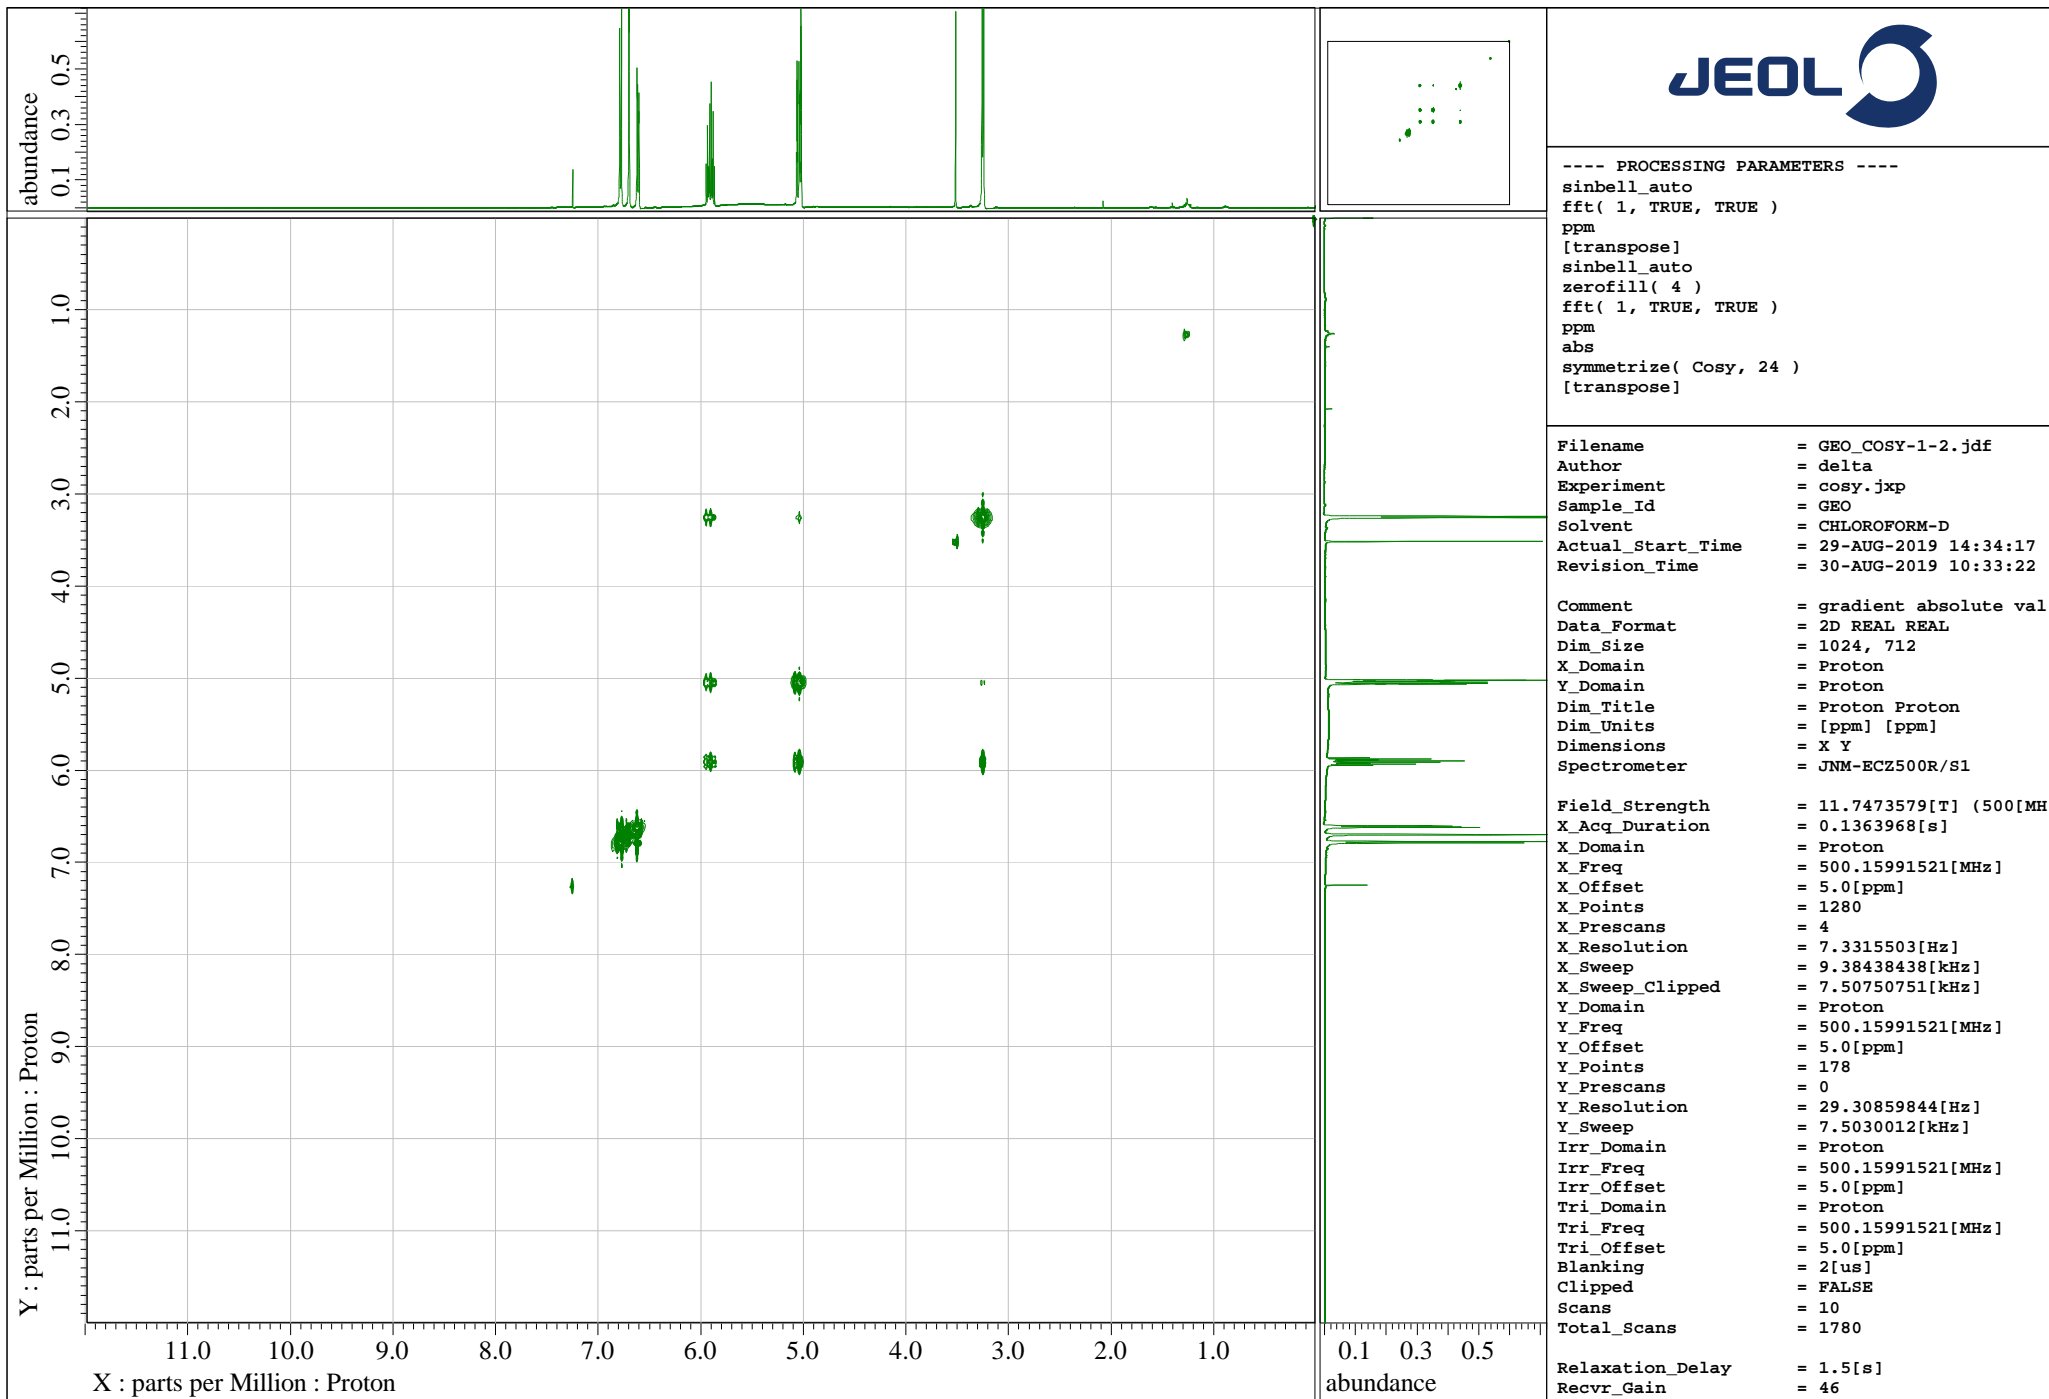

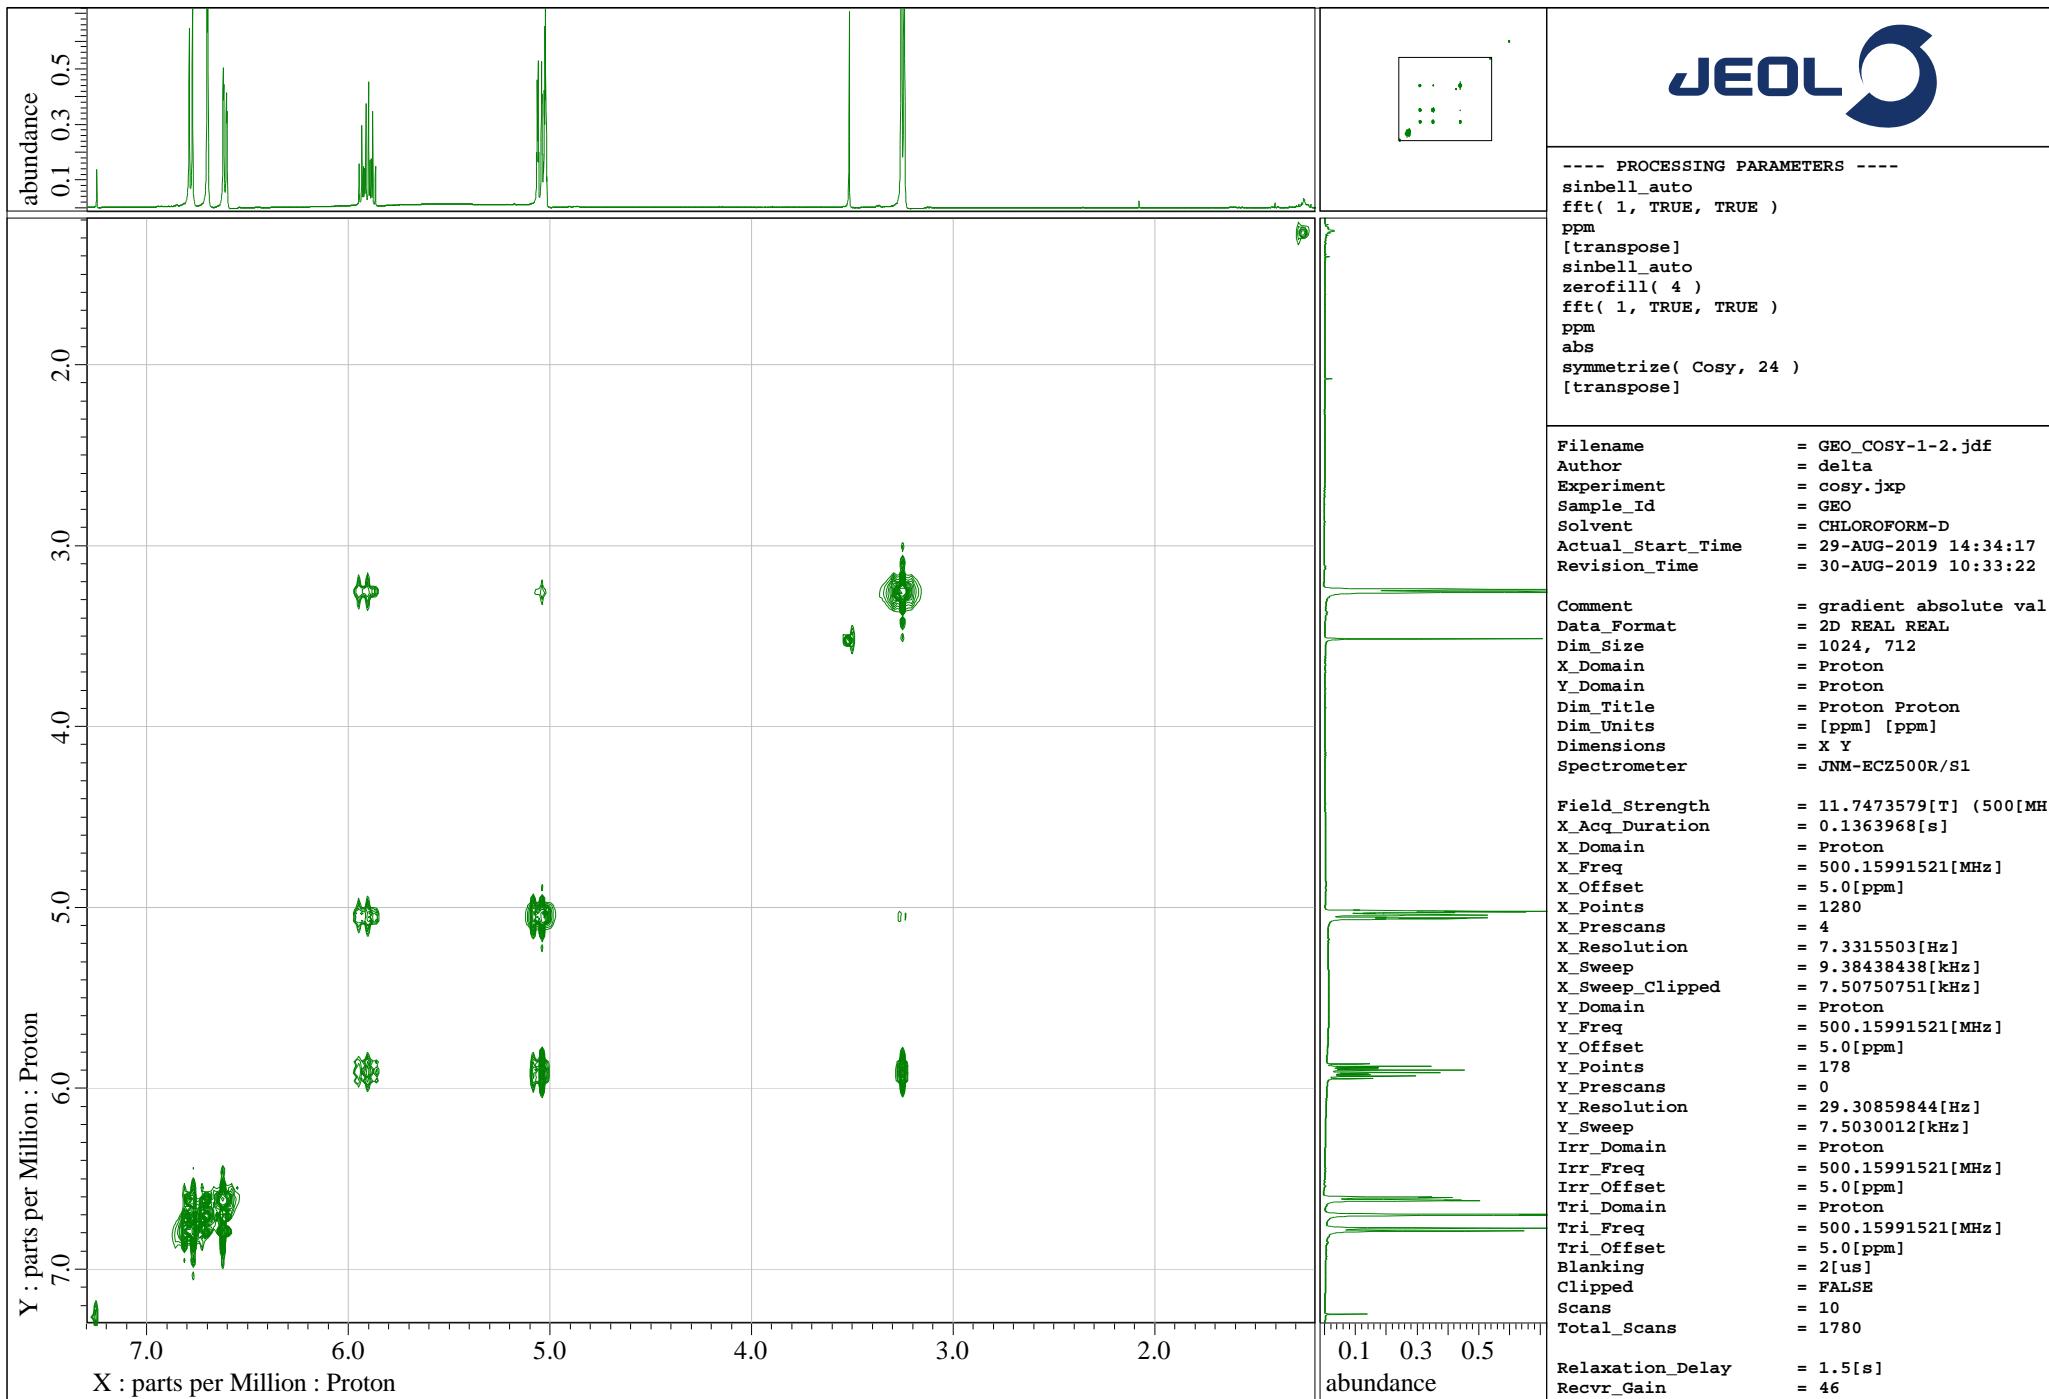



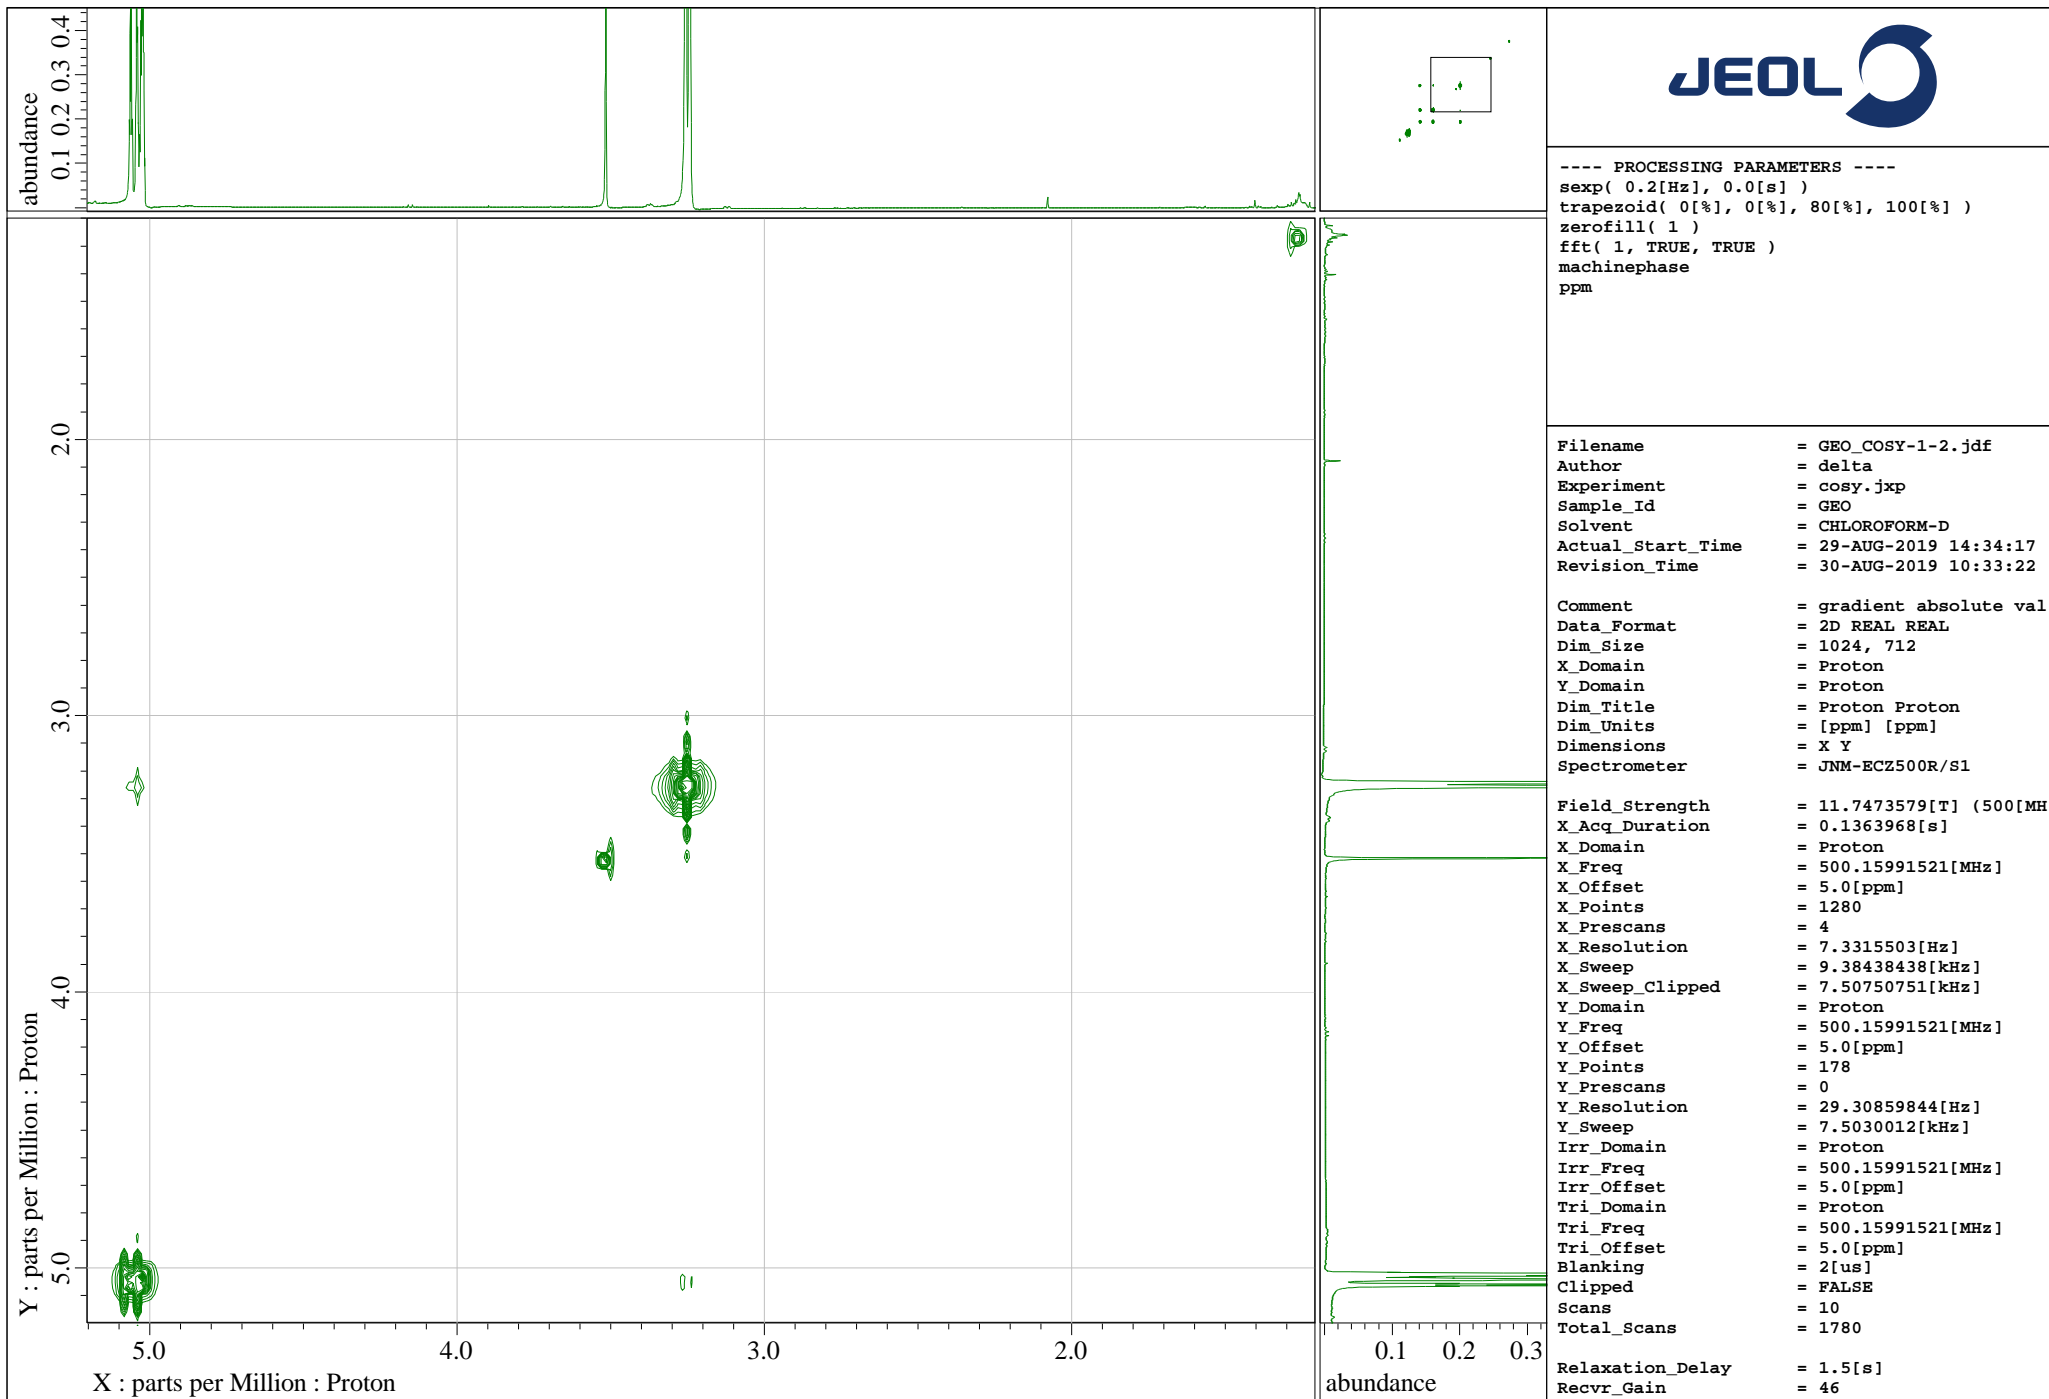

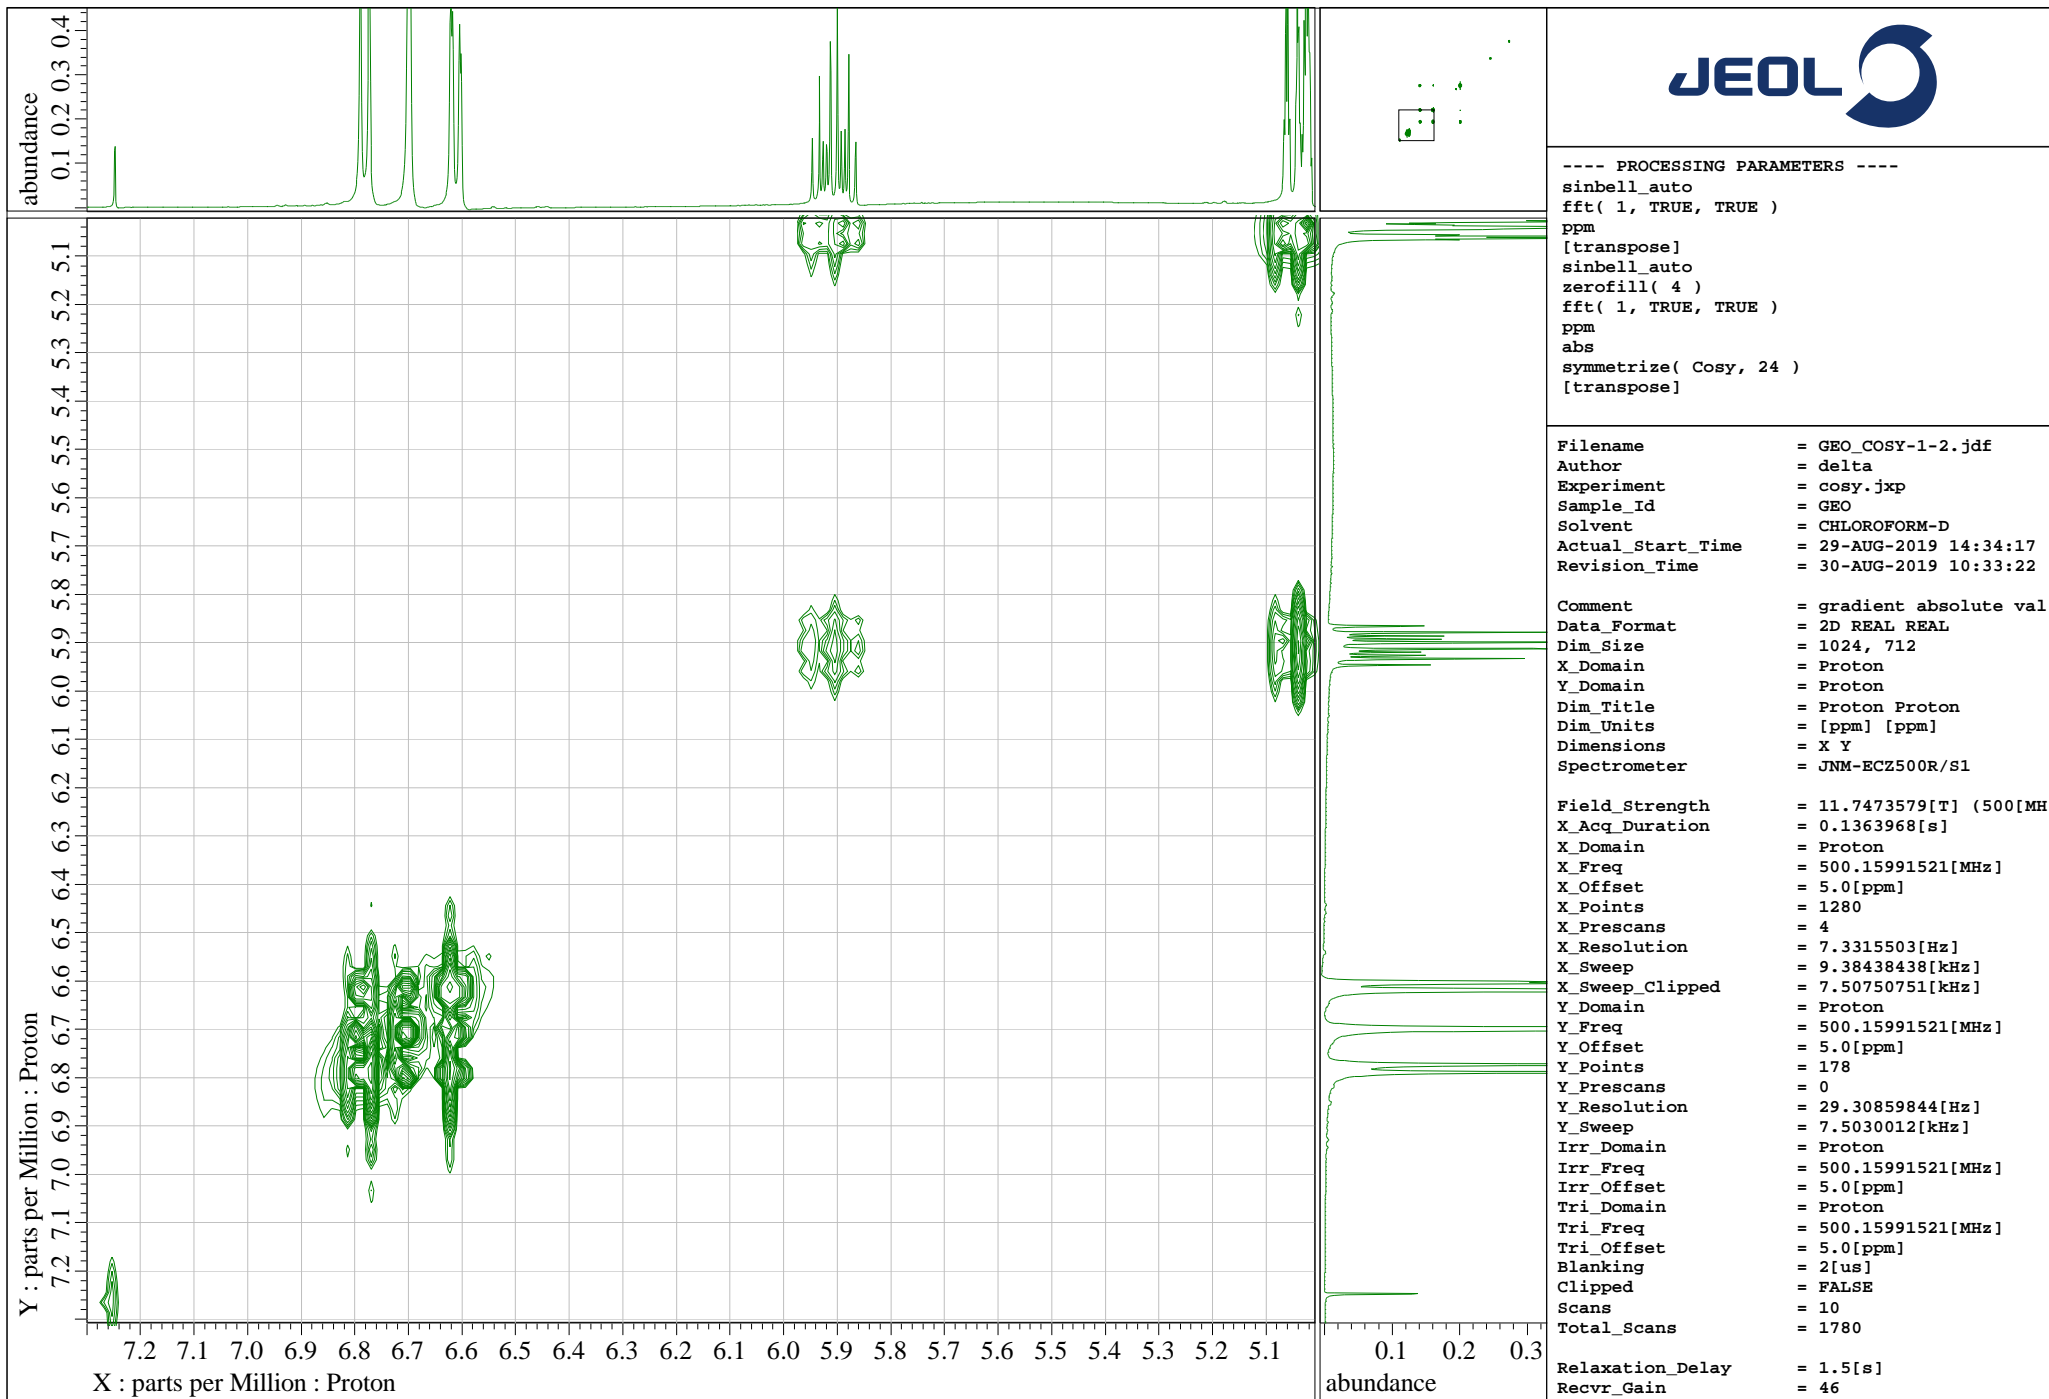

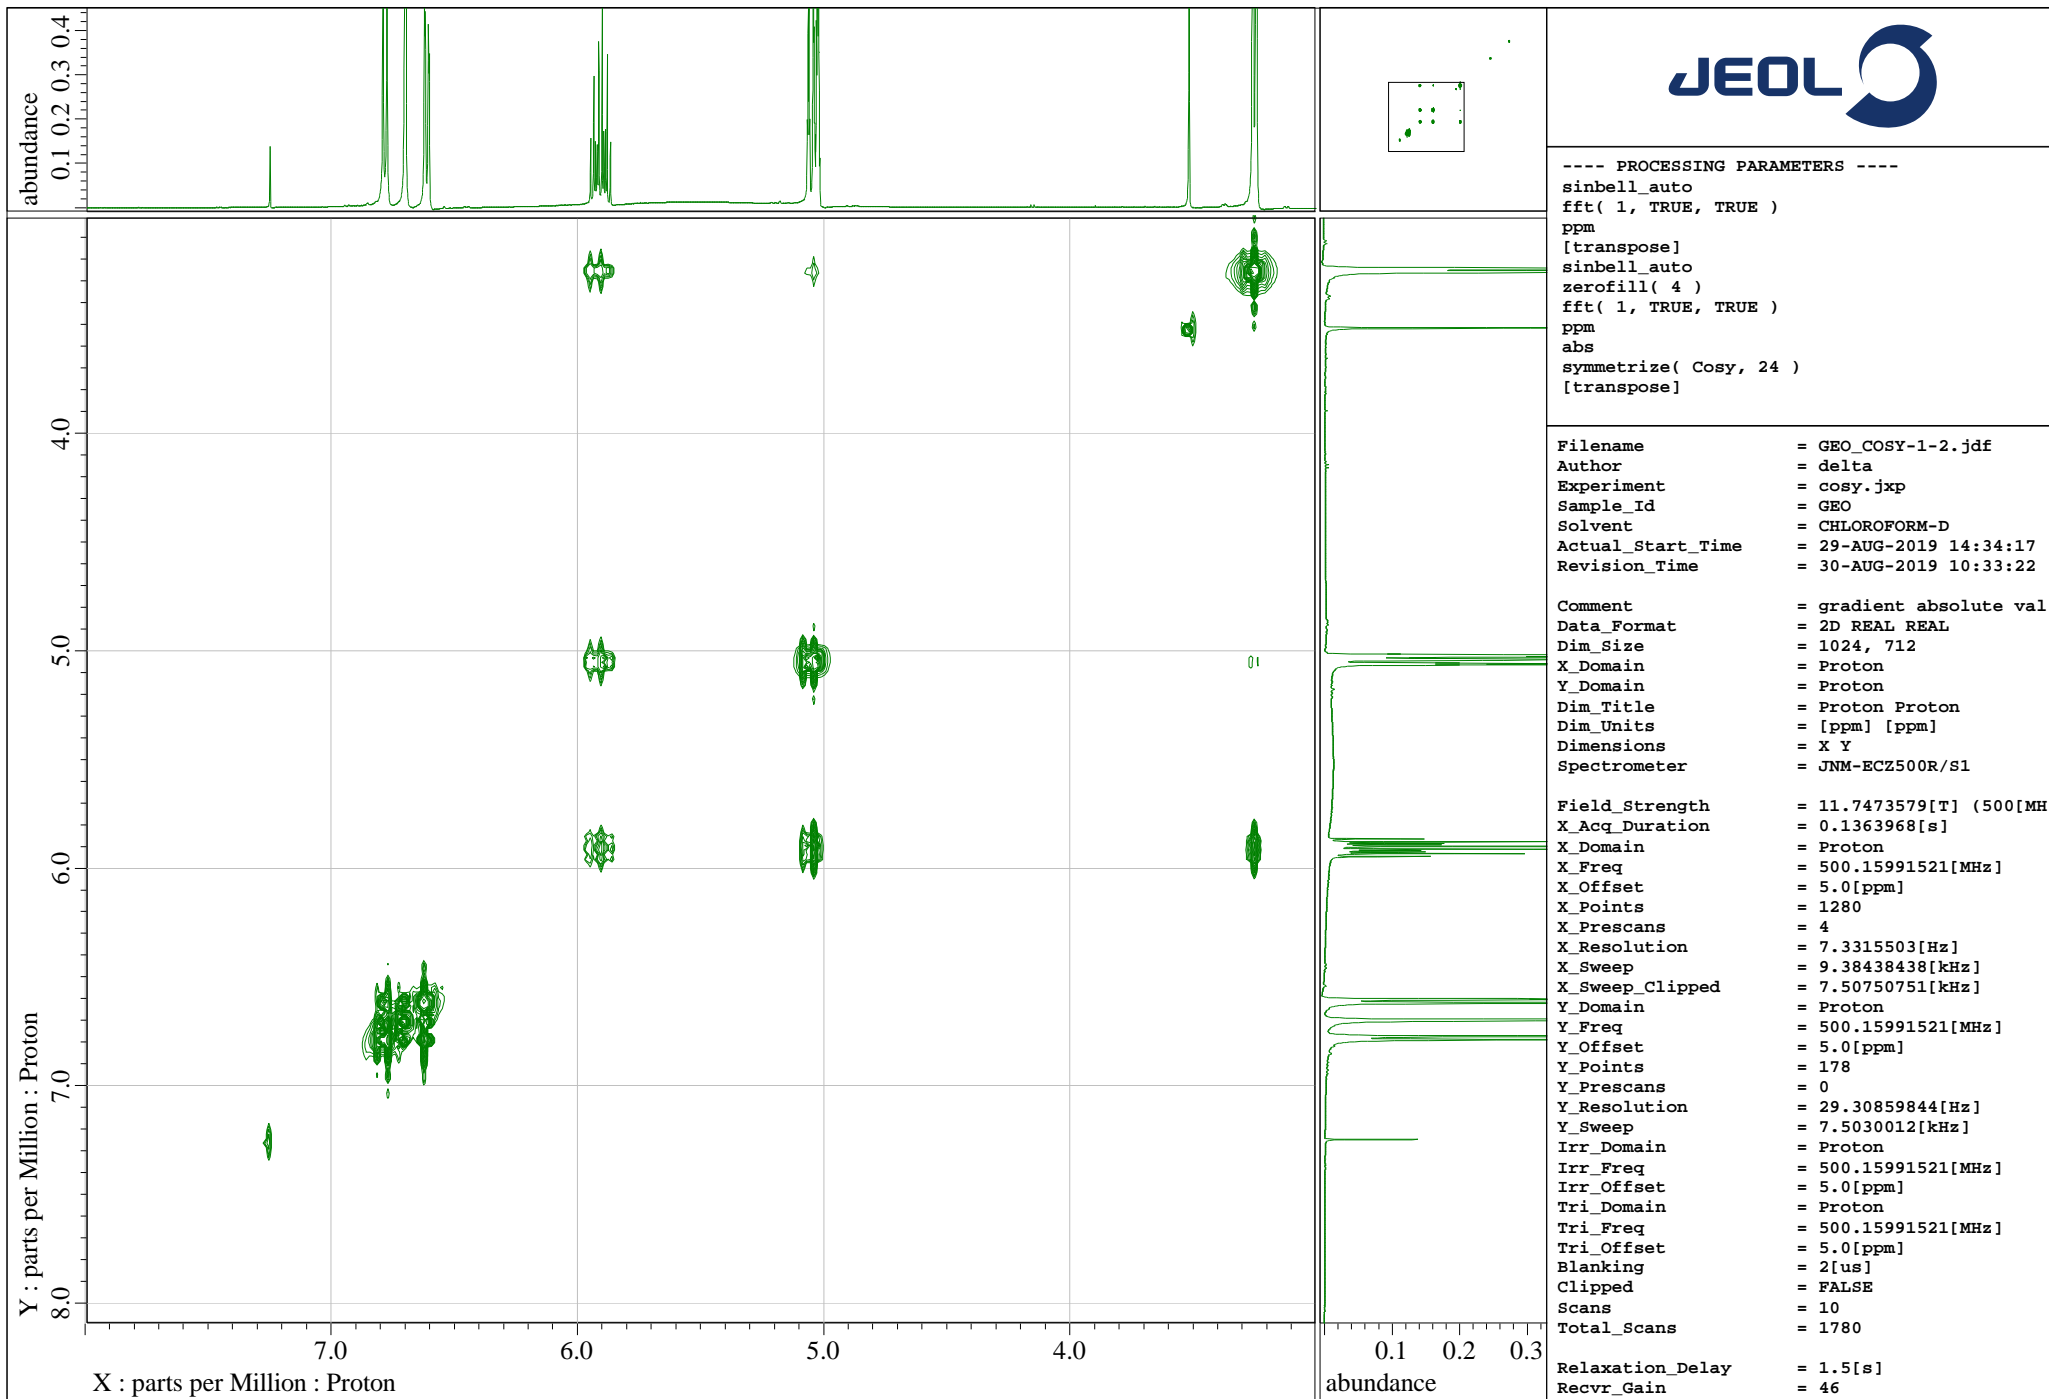

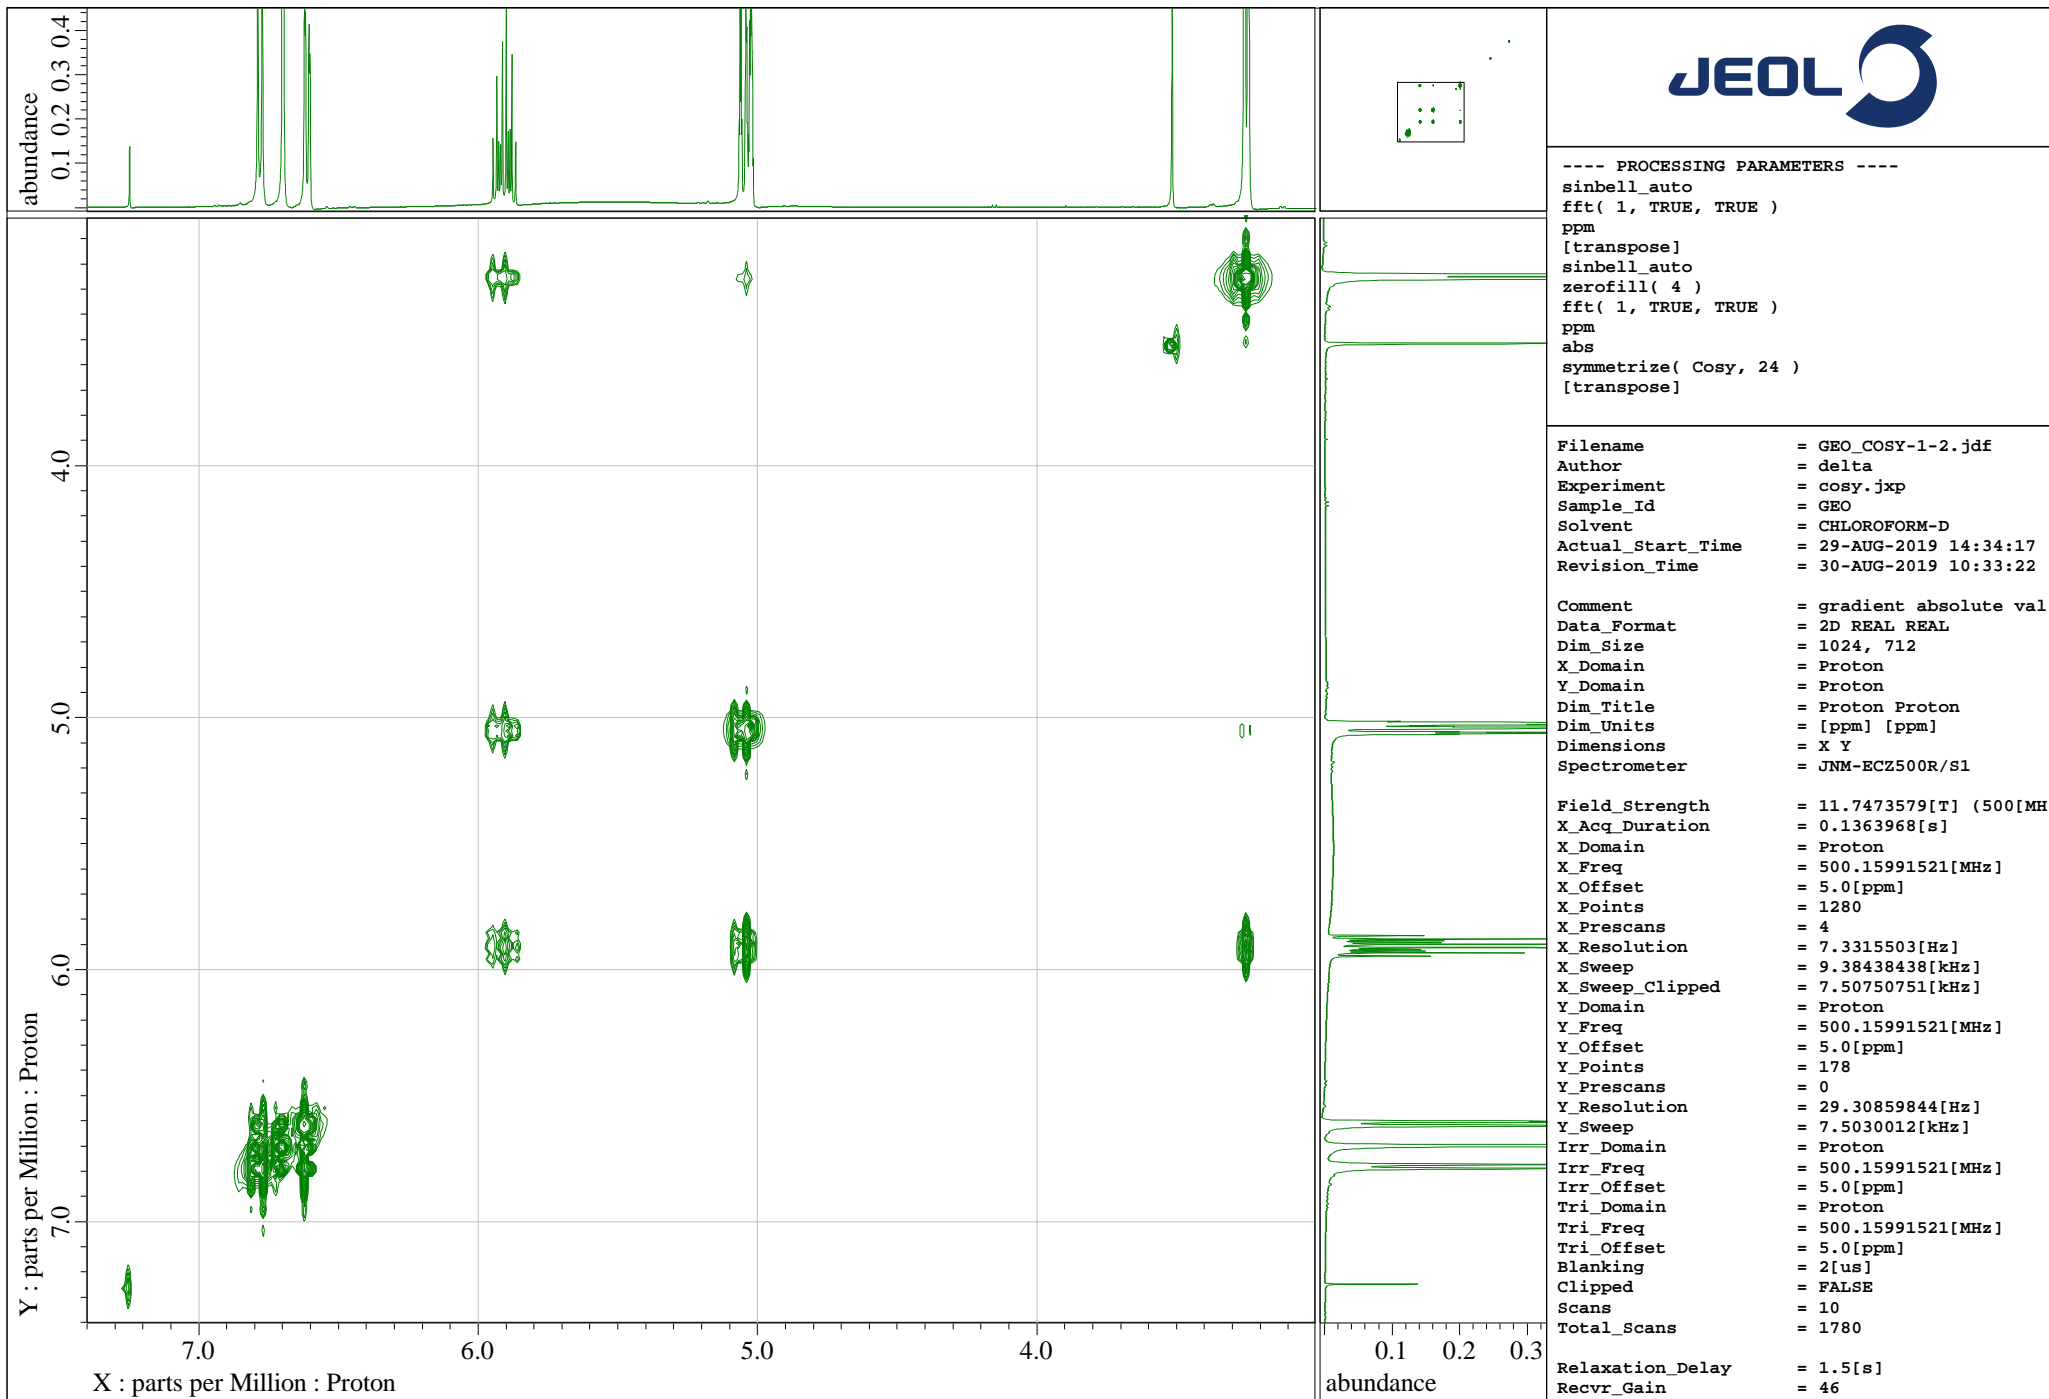

Supplement: Supplementary file 3 [file 15_Jul_2020_Supplement_material_data_3_-_NMR_spectrum_of_compound_1.pdf › 15_Jul_2020_Supplement_material_data_3_-_NMR_spectrum_of_compound_1.pdf]
