# Supplementary material
Source: publisher site journal article supplement (https://www.dovepress.com/article/255269)

Geofanny Sarah

SAMPEL\_1\_04102019\_FSC 110 (0.971)

Scan ES-  
6.03e7

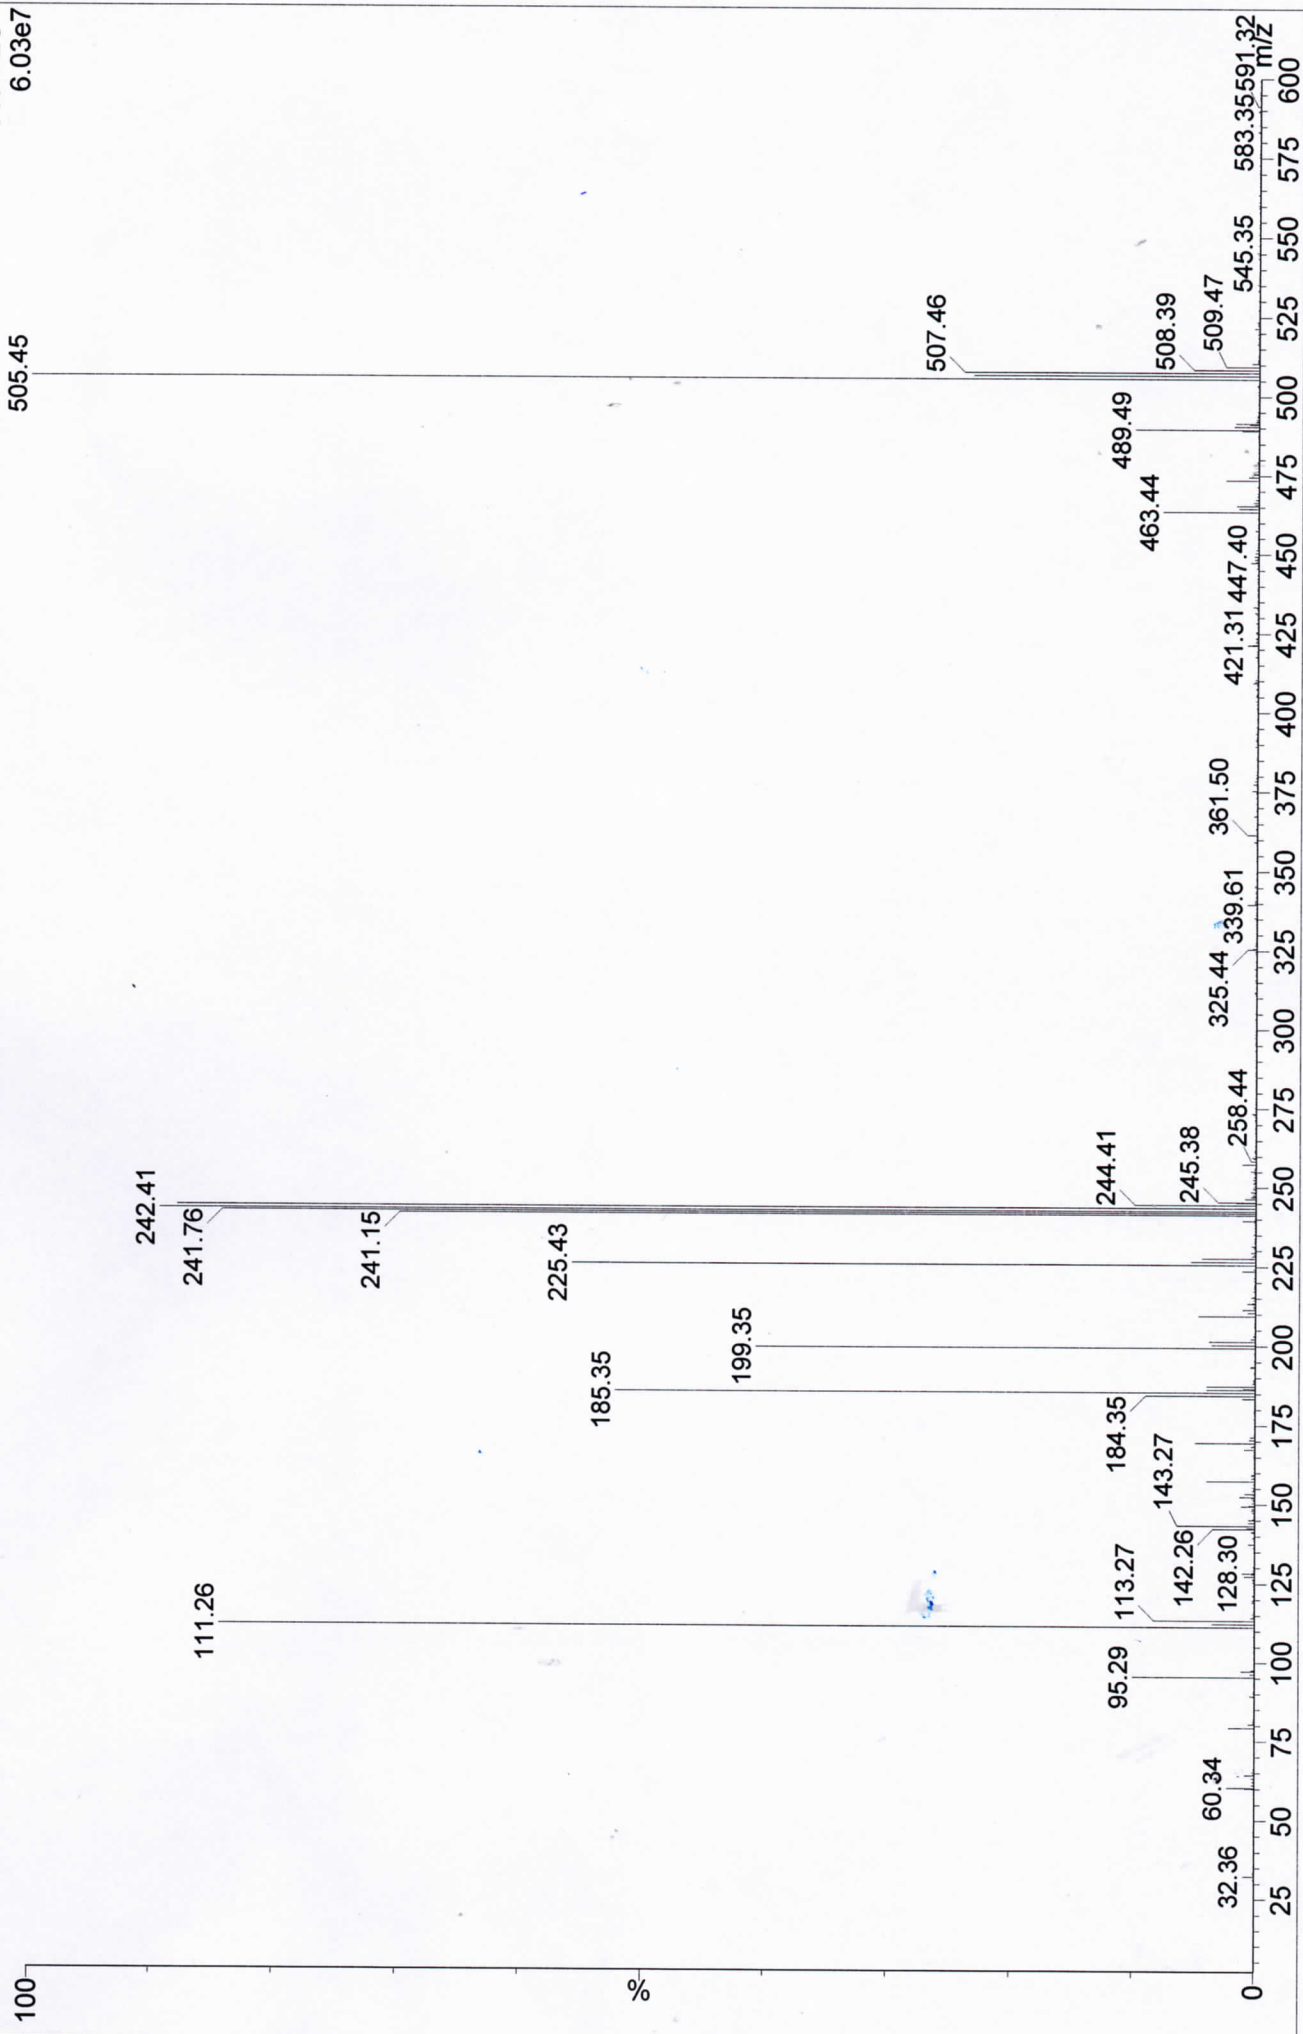

Geofanny Sarah

SAMPEL\_1\_04102019\_FSC 98 (0.865)

Scan ES-  
3.21e6

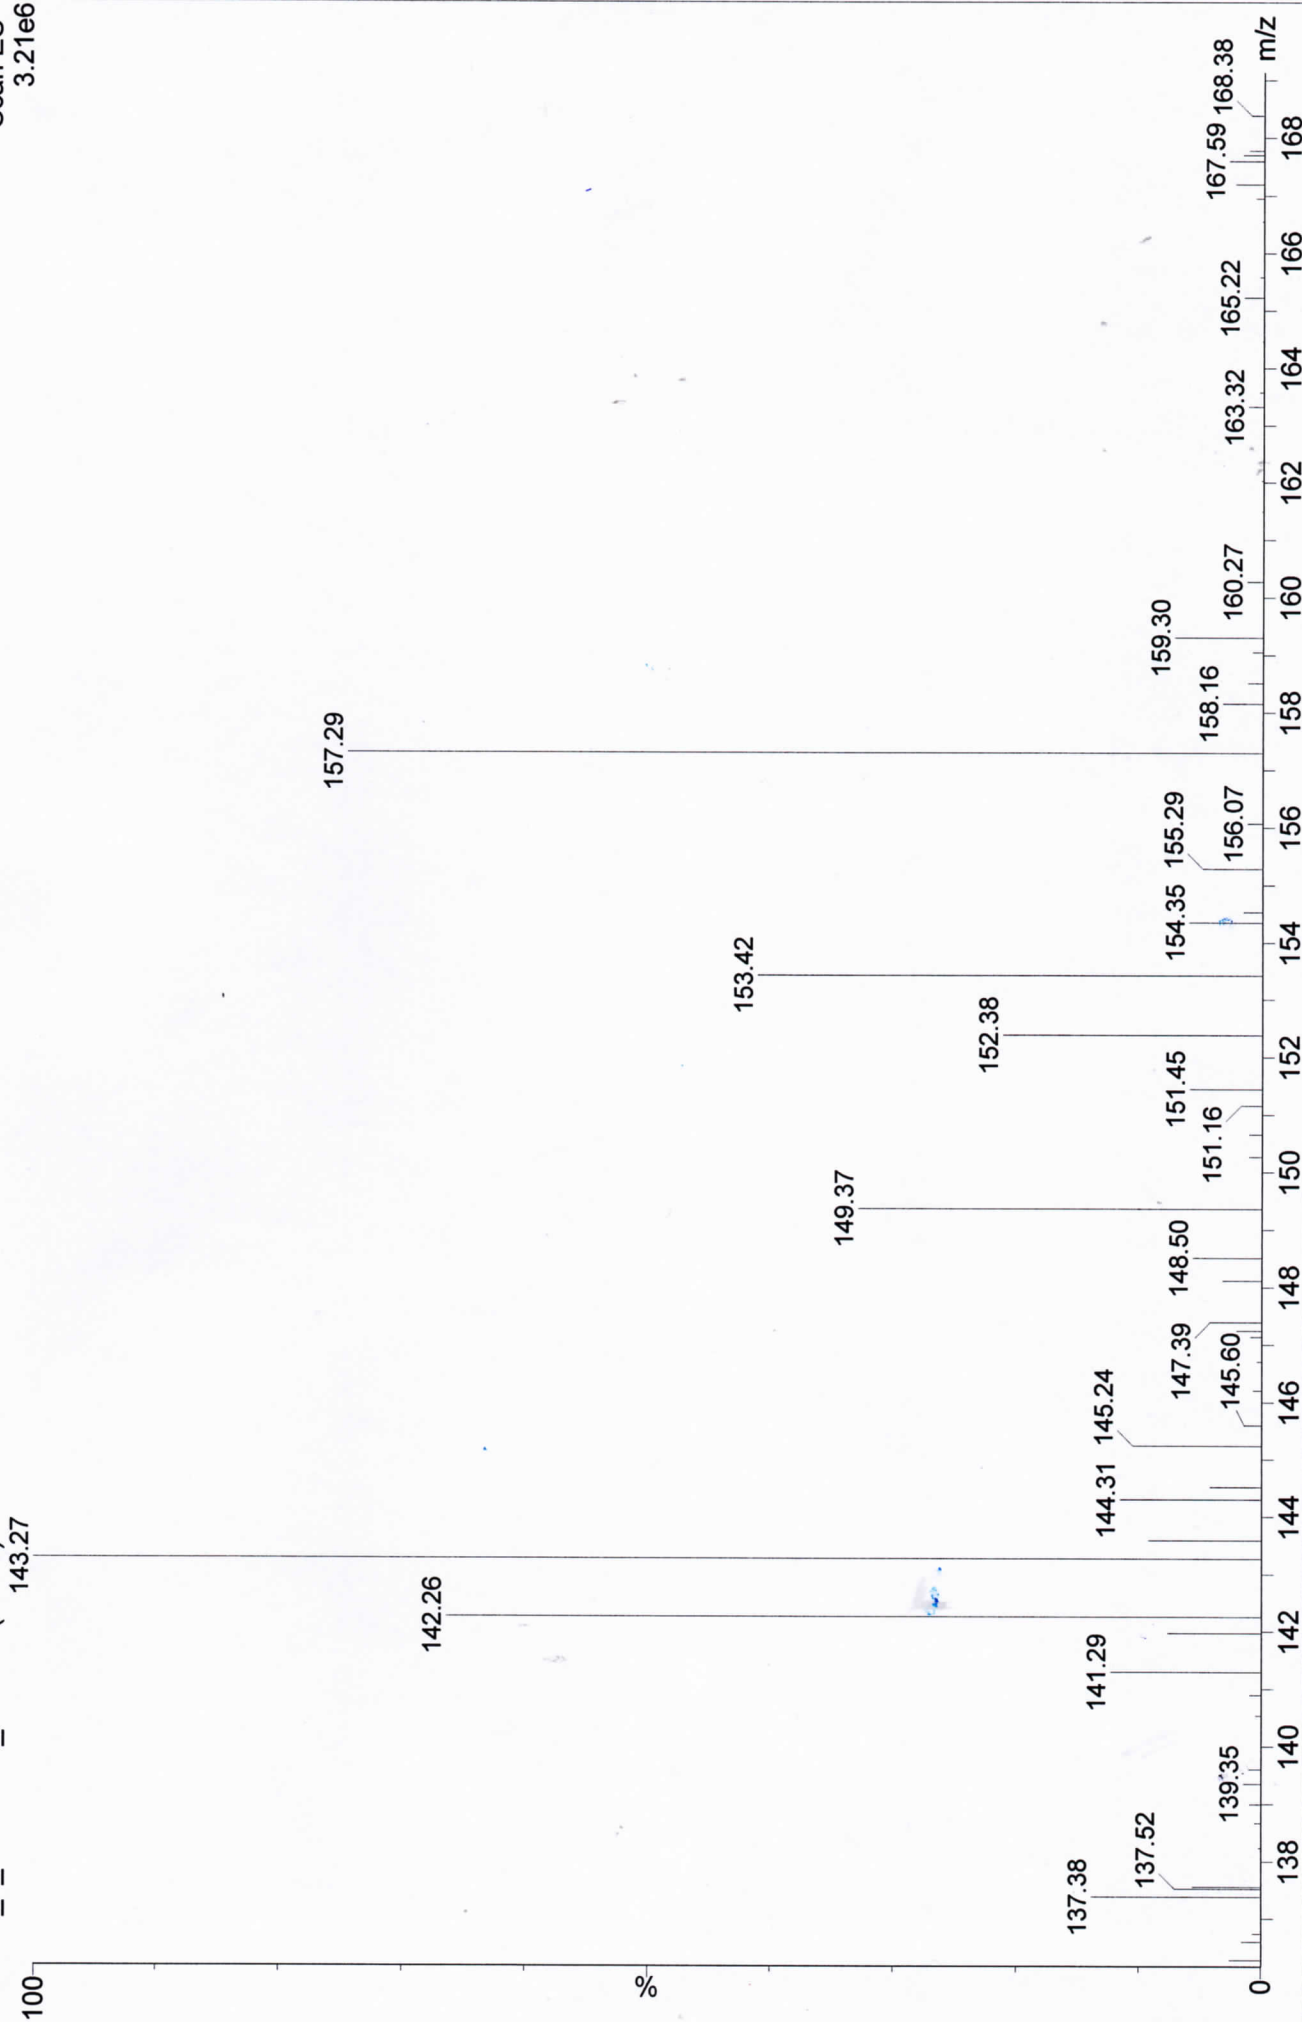

Geofanny Sarah

SAMPEL\_1\_04102019\_SC 1 (0.017) Sm (SG, 1x0.50)

Scan ES-  
8.38e6

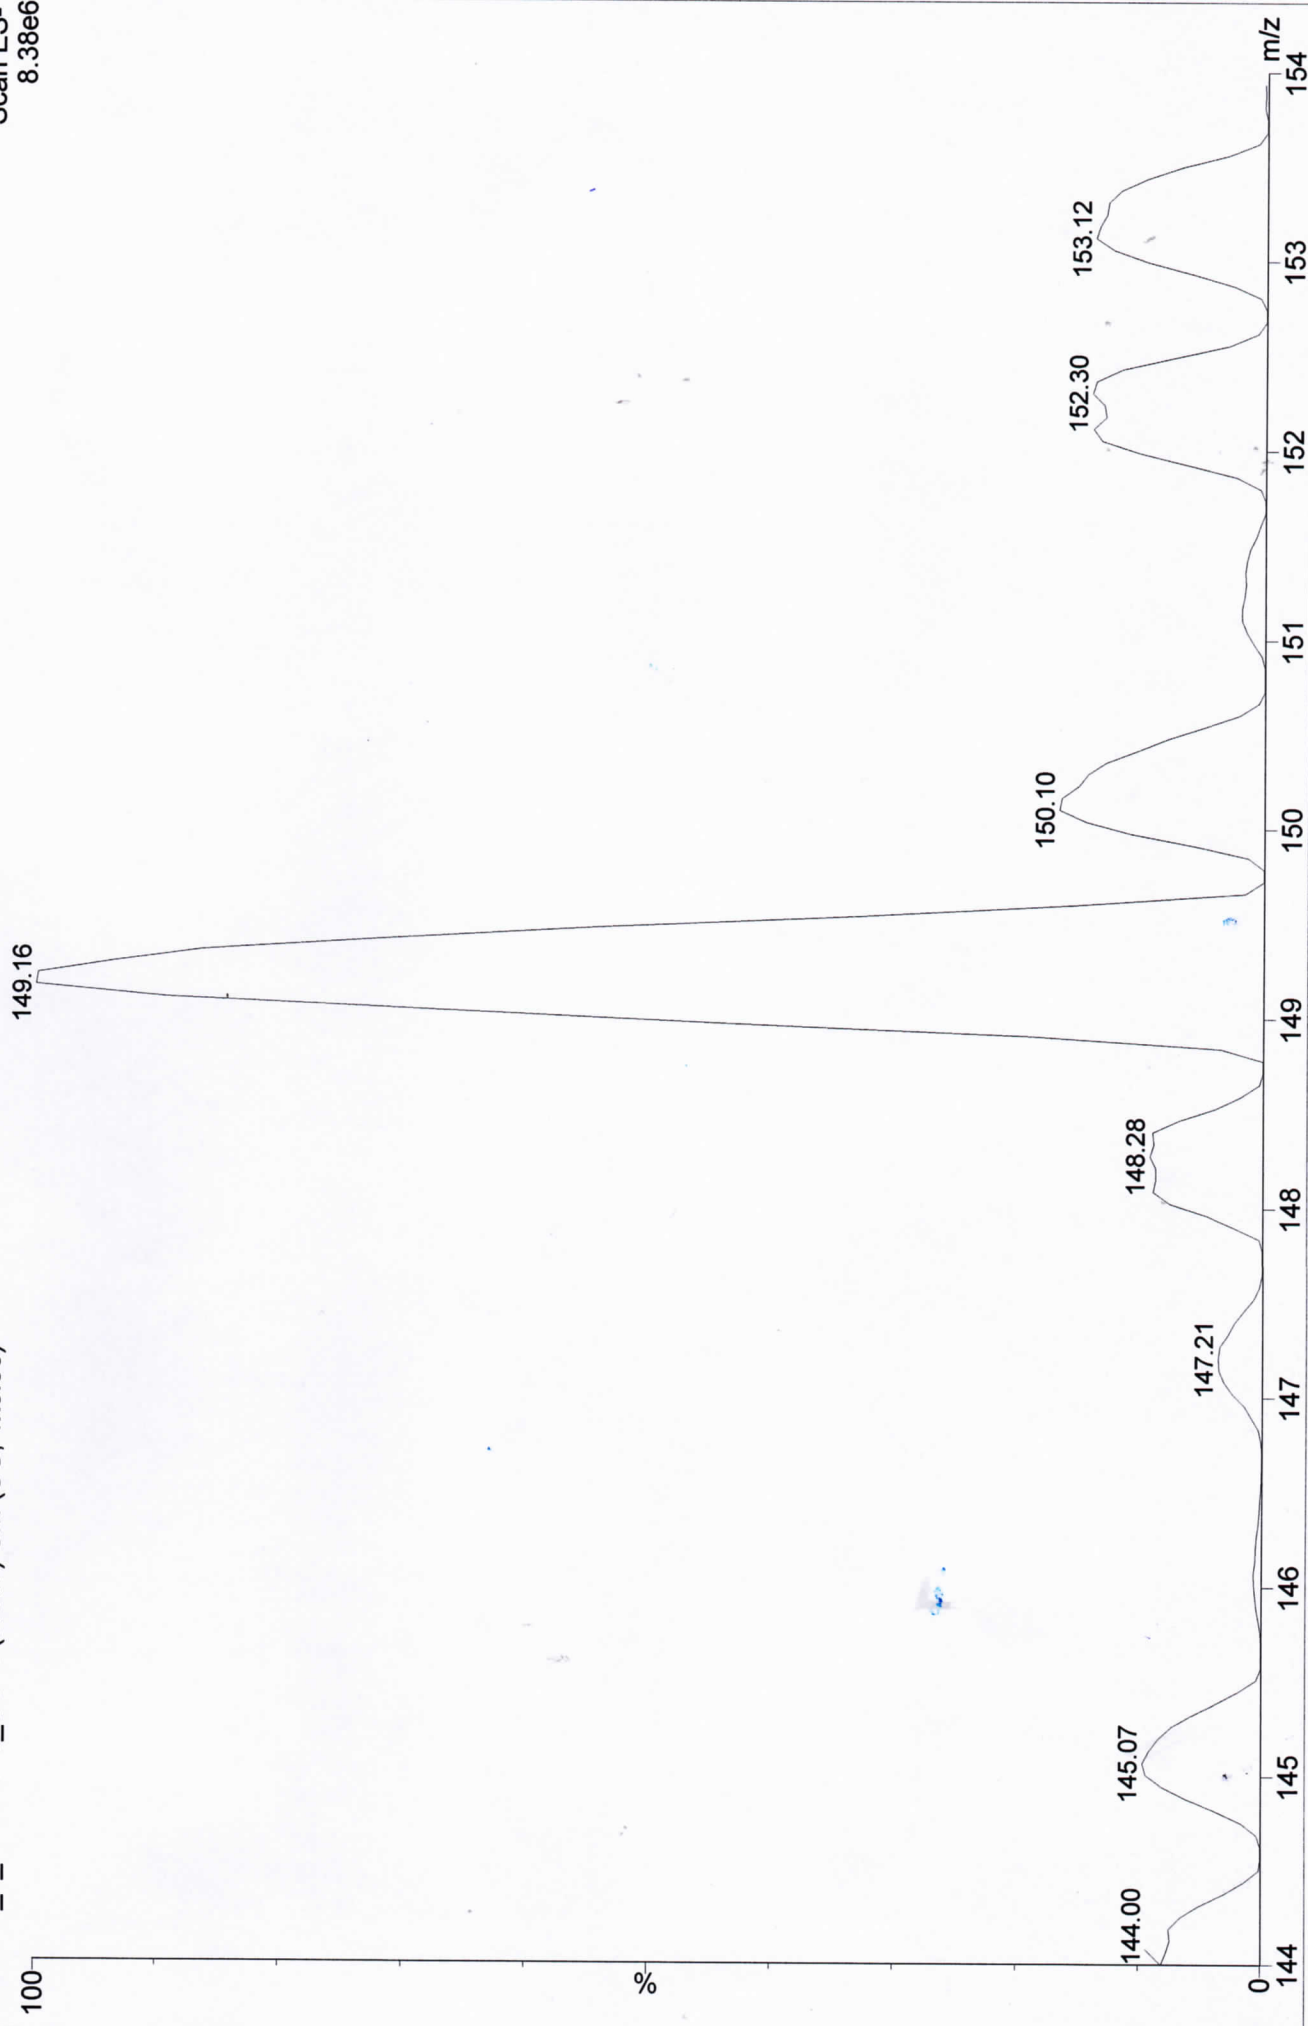

Supplement: Supplementary file 5 [file 15_Jul_2020_Supplement_material_data_5_-_ES-_Mass_spectrum_of_compound_1.pdf › 15_Jul_2020_Supplement_material_data_5_-_ES-_Mass_spectrum_of_compound_1.pdf]
