# Supplementary material
Source: publisher site journal article supplement (https://www.dovepress.com/article/255269)

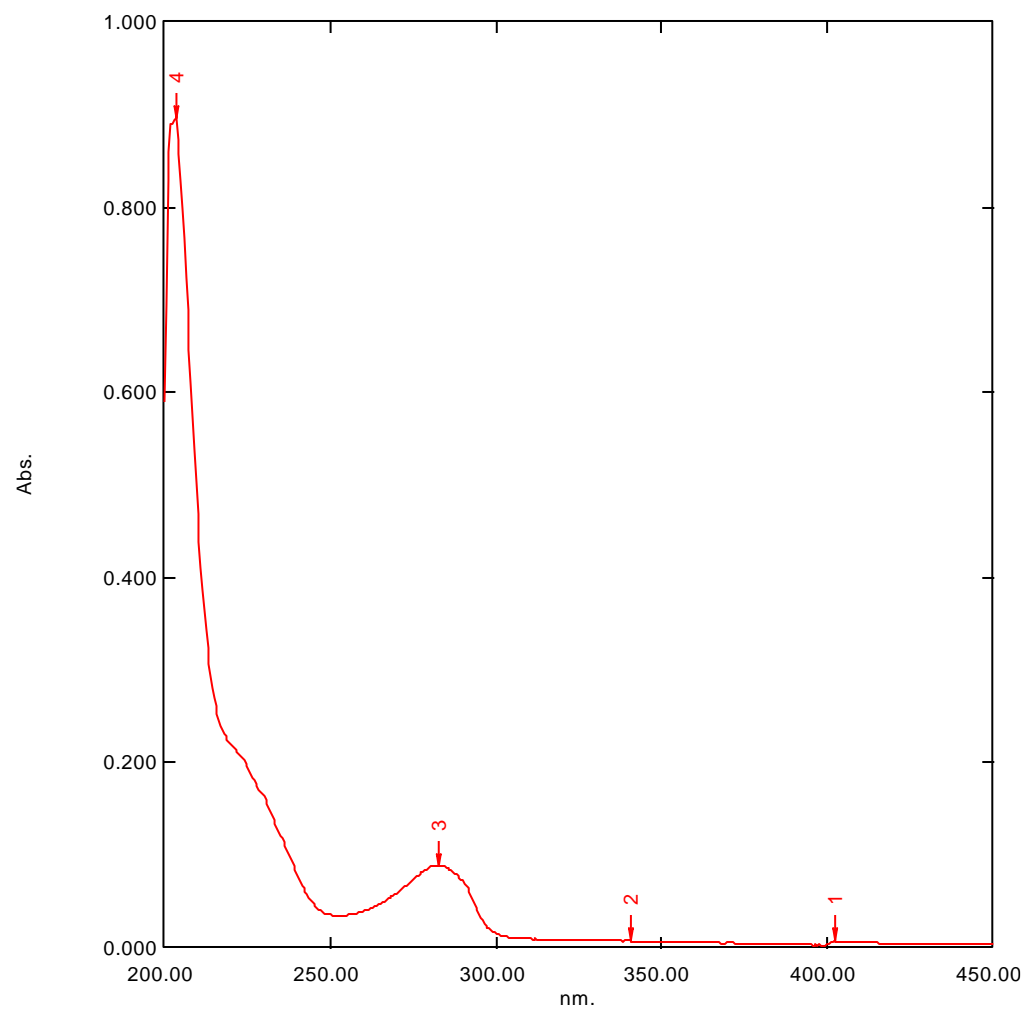

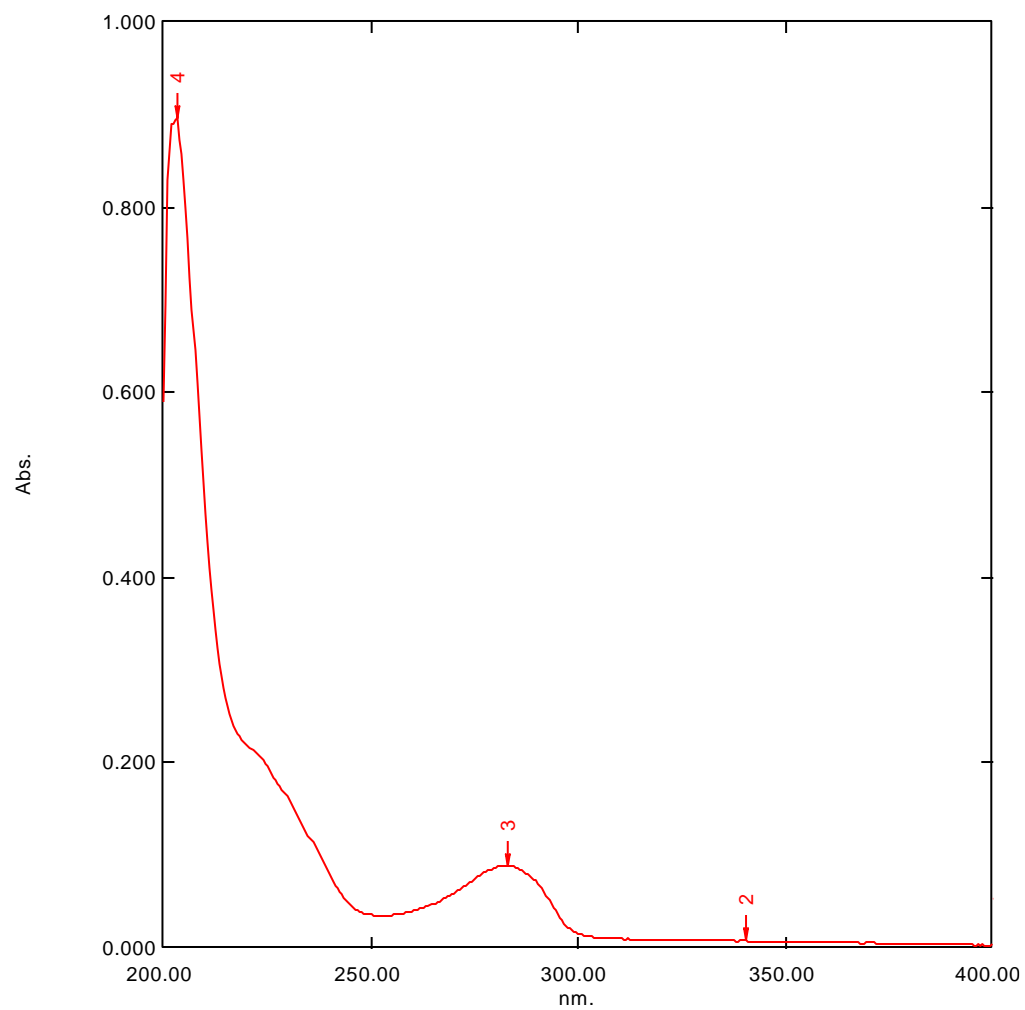

| No. | P/V | Wavelength nm. | Abs.  | Description |
|-----|-----|----------------|-------|-------------|
| 1   |     | 402.00         | 0.008 |             |
| 2   |     | 340.50         | 0.010 |             |
| 3   |     | 283.00         | 0.089 |             |
| 4   |     | 203.50         | 0.896 |             |
| 5   |     | 399.50         | 0.003 |             |
| 6   |     | 338.50         | 0.007 |             |
| 7   |     | 253.00         | 0.035 |             |

Supplement: Supplementary file 1 [file 15_Jul_2020_Supplement_material_data_1_-_UV_spectrum_of_compound_1.pdf › 15_Jul_2020_Supplement_material_data_1_-_UV_spectrum_of_compound_1.pdf]

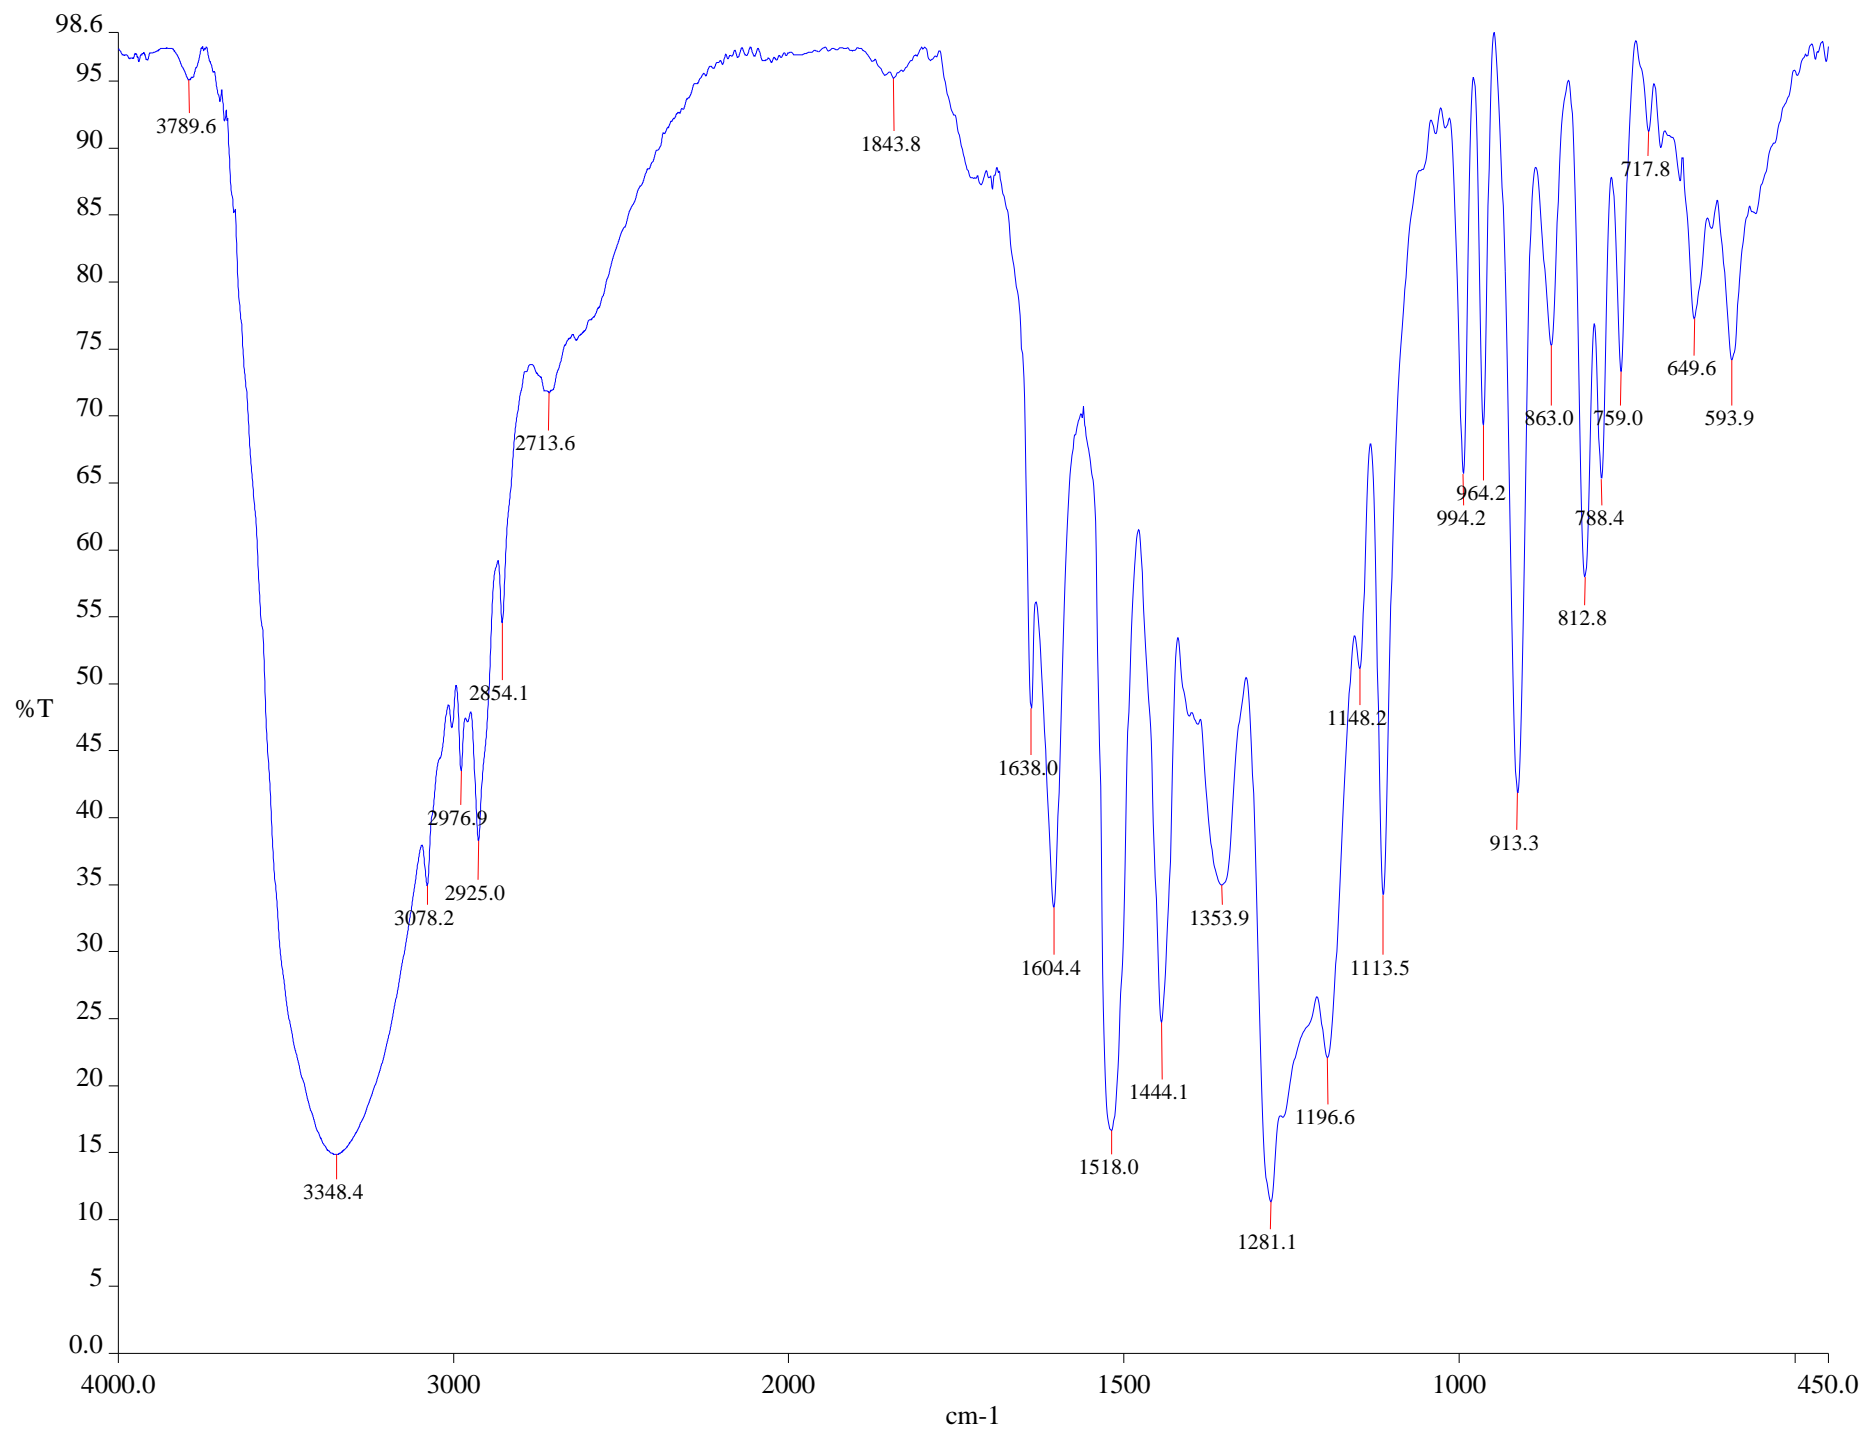

d:\ko\2016\sarah\geofany isolat 1 20 september 2019 edit.sp - isolat 1

Supplement: Supplementary file 2 [file 15_Jul_2020_Supplement_material_data_2_-_IR_spectrum_of_compound_1.pdf › 15_Jul_2020_Supplement_material_data_2_-_IR_spectrum_of_compound_1.pdf]

Geofanny Sarah

SAMPEL\_1\_04102019\_FSC\_ES+ 113 (0.997)

Scan ES+  
4.51e7

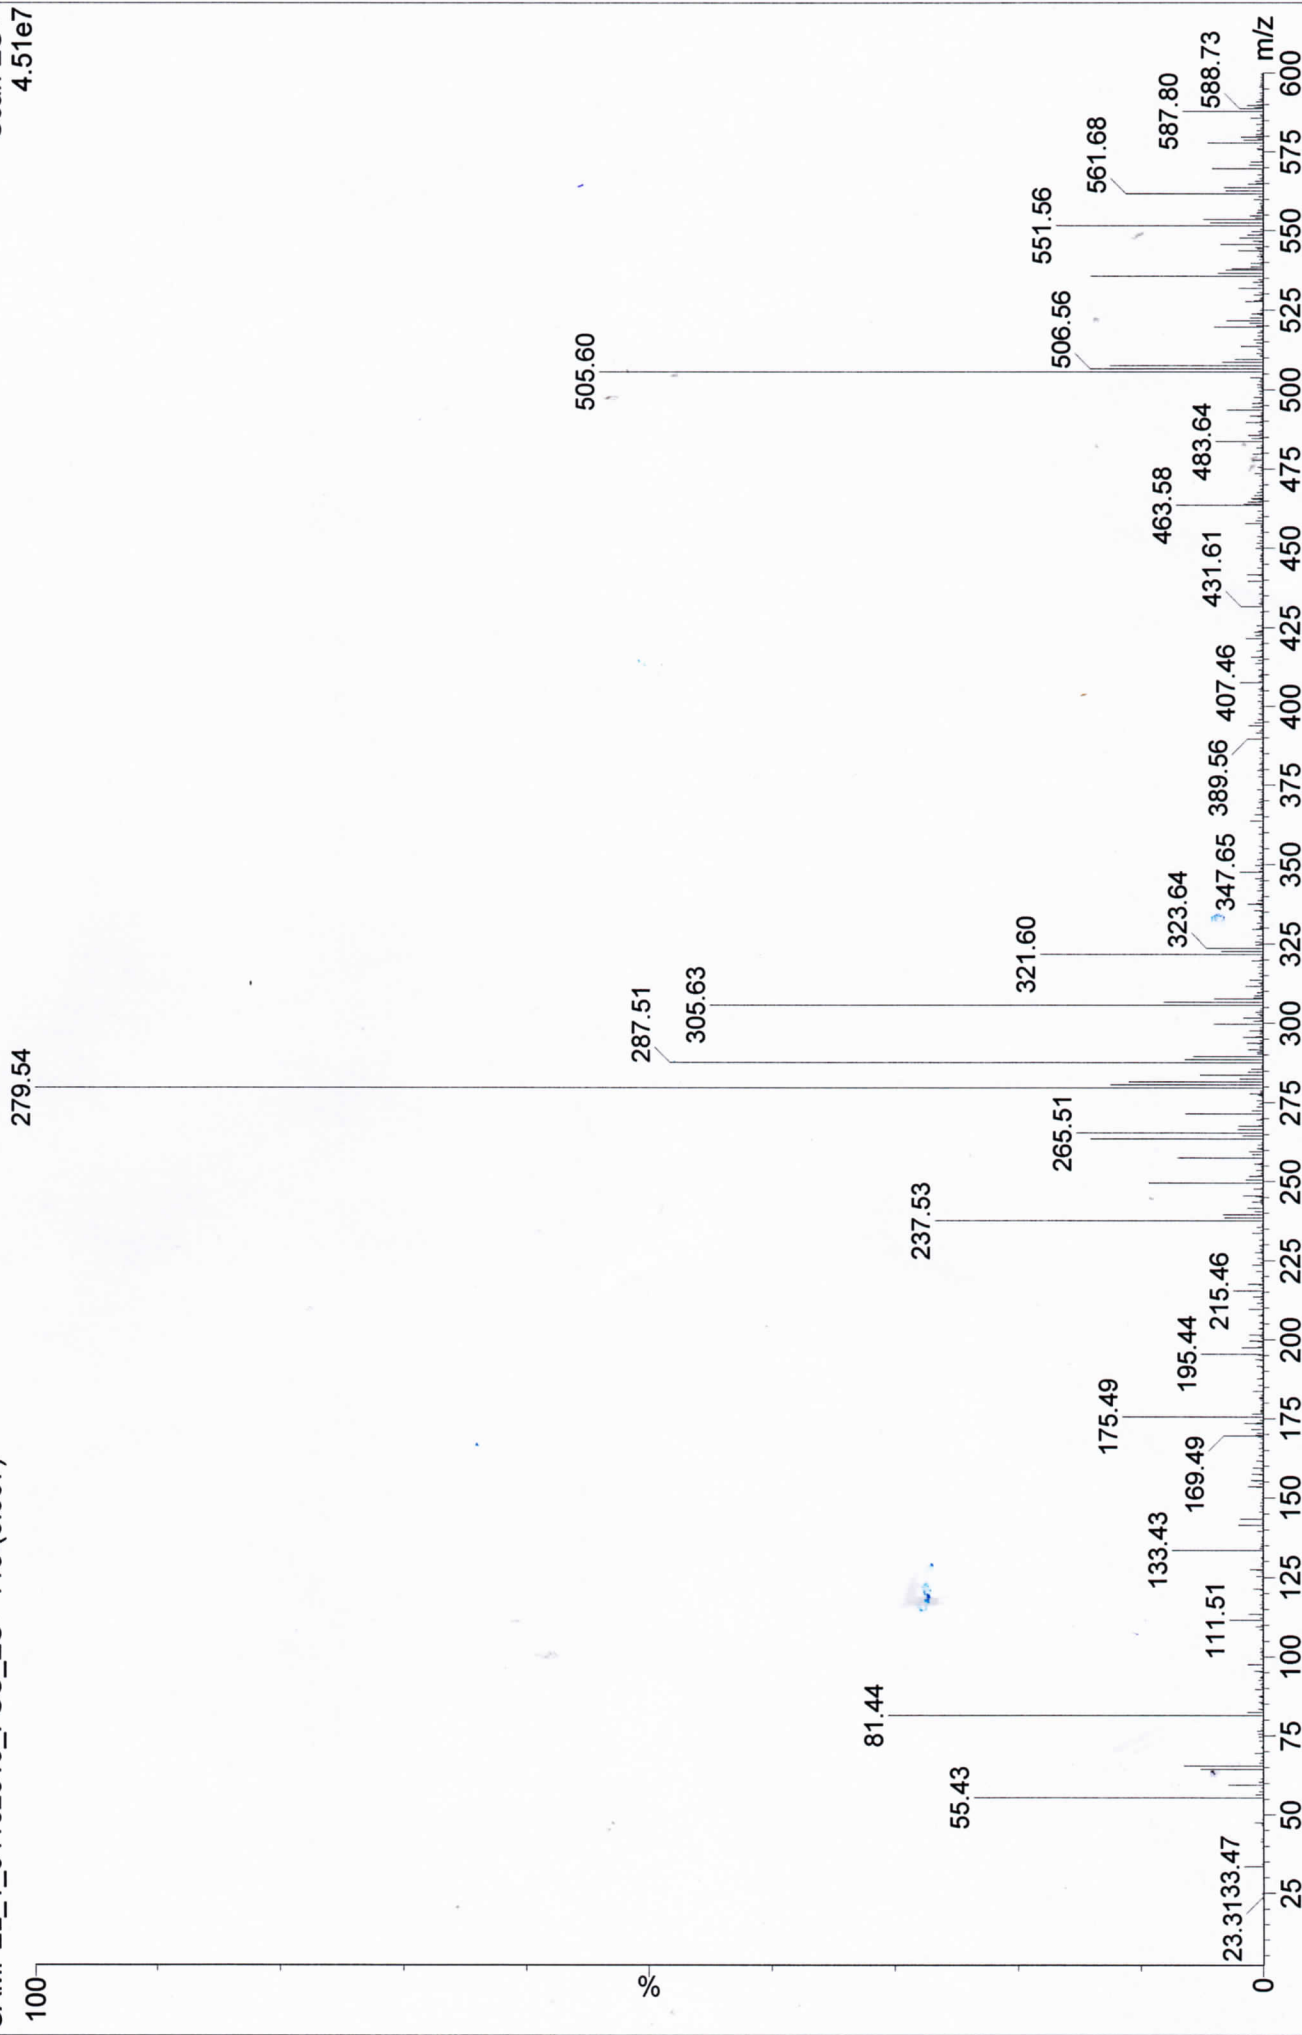

Geofanny Sarah

SAMPEL\_1\_04102019\_FSC\_ES+ 111 (0.980)

Scan ES+  
4.84e6

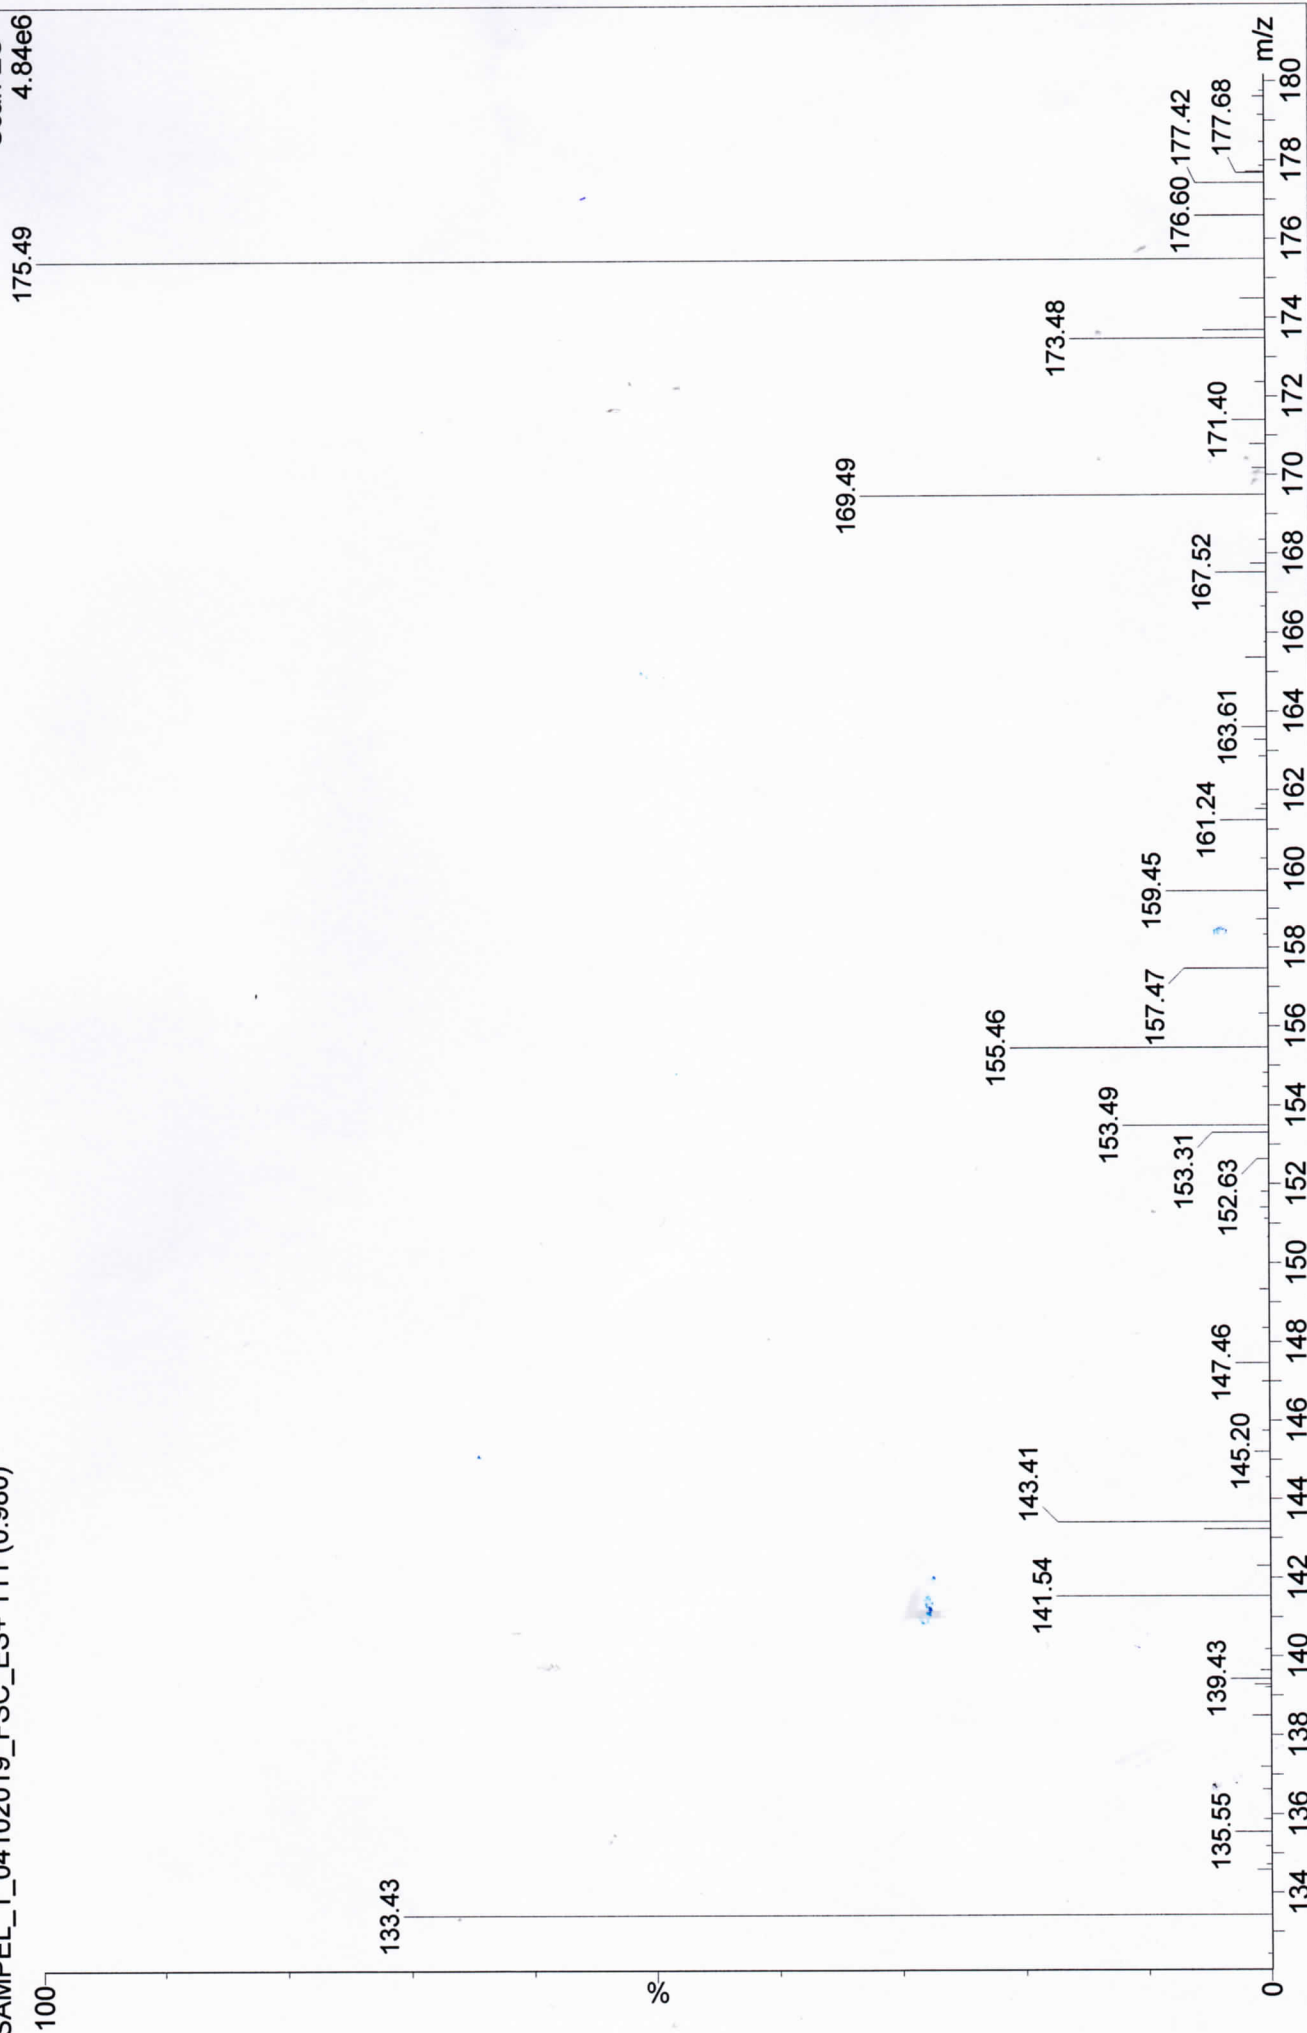

Supplement: Supplementary file 4 [file 15_Jul_2020_Supplement_material_data_4_-_ES_Mass_spectrum_of_compound_1.pdf › 15_Jul_2020_Supplement_material_data_4_-_ES_Mass_spectrum_of_compound_1.pdf]
